# Supplementary material for: Comprehensive analysis of cuproptosis-related long non-coding RNA signature and personalized therapeutic strategy of breast cancer patients
Source: PubMed Central journal article supplement (PMC9815178; doi:10.3389/fonc.2022.1081089), 2022-12-22
Supplement: DataSheet_1.pdf [file DataSheet_1.pdf]

| id           | B cells naive | B cells memory | Plasma cells | T cells CD8 | T cells CD4 naive |
|--------------|---------------|----------------|--------------|-------------|-------------------|
| TCGA-A2-A259 | 0.1306584     | 0              | 0            | 0.01249958  | 0                 |
| TCGA-LL-A5YL | 0.1206136     | 0              | 0.00623823   | 0.09991668  | 0                 |
| TCGA-AC-A6IV | 0.0861181     | 0              | 0            | 0.04084921  | 0                 |
| TCGA-D8-A1X7 | 0.0658515     | 0              | 0            | 0           | 0                 |
| TCGA-AO-A0J2 | 0.0237042     | 0              | 0.00588157   | 0.03023945  | 0                 |
| TCGA-A2-A04Y | 0.0758111     | 0              | 0.08114937   | 0.07187853  | 0                 |
| TCGA-BH-A0B0 | 0.0917598     | 0              | 0.00618201   | 0.08401124  | 0                 |
| TCGA-EW-A1P1 | 0.0019411     | 0              | 0            | 0.06658578  | 0                 |
| TCGA-OL-A66J | 0.0742472     | 0              | 0.02407583   | 0.04741561  | 0                 |
| TCGA-A8-A08A | 0.1033496     | 0              | 0            | 0.02145192  | 0                 |
| TCGA-AO-A03O | 0.0178578     | 0              | 0.04817039   | 0           | 0                 |
| TCGA-AR-A2LQ | 0.0001812     | 0              | 0.0552109    | 0           | 0                 |
| TCGA-AN-A0AM | 0.1132179     | 0              | 0.07418819   | 0.01714326  | 0                 |
| TCGA-A2-A0SY | 0.1539524     | 0              | 0.05747799   | 0.06037867  | 0                 |
| TCGA-AN-A0XO | 0.0072707     | 0              | 0.00207926   | 0           | 0                 |
| TCGA-BH-A0BJ | 0.1041936     | 0              | 0.04715778   | 0.04068491  | 0                 |
| TCGA-BH-A0HA | 0.0897104     | 0              | 0.05074191   | 0.03681669  | 0                 |
| TCGA-D8-A142 | 0.0472173     | 0              | 0.20370396   | 0.06256105  | 0                 |
| TCGA-E9-A3HO | 0.0094431     | 0              | 0            | 0.09514933  | 0                 |
| TCGA-A2-A0T0 | 0.0523747     | 0              | 0            | 0.01399727  | 0                 |
| TCGA-B6-A408 | 0.0973046     | 0              | 0.07355411   | 0.01398605  | 0                 |
| TCGA-BH-A0EB | 0.0914572     | 0              | 0.05149044   | 0.02785224  | 0                 |
| TCGA-GI-A2C9 | 0.0308632     | 0              | 0            | 0           | 0                 |
| TCGA-BH-A0H7 | 0.0849839     | 0              | 0.00579249   | 0.02120532  | 0                 |
| TCGA-AR-A24U | 0.0646133     | 0              | 0.04923042   | 0.01225682  | 0                 |
| TCGA-E2-A14O | 0.0292988     | 0              | 0.02216928   | 0.04316651  | 0                 |
| TCGA-E2-A10F | 0.0694551     | 0              | 0            | 0.0412192   | 0                 |
| TCGA-A7-A26H | 0.0670337     | 0              | 0.01045933   | 0.01410861  | 0                 |
| TCGA-BH-A42U | 0.130416      | 0              | 0.01688363   | 0.06790427  | 0                 |
| TCGA-AN-A0FX | 0.1398259     | 0              | 0.03641252   | 0.03899356  | 0                 |
| TCGA-EW-A1OZ | 0.0566576     | 0              | 0            | 0.01538945  | 0                 |
| TCGA-A7-A0DA | 0.0469431     | 0              | 0.01041516   | 0           | 0                 |
| TCGA-5L-AA0  | 0.0967567     | 0              | 0.00738965   | 0.0981826   | 0                 |
| TCGA-BH-A0BQ | 0.068816      | 0              | 0.04549125   | 0.08457208  | 0                 |
| TCGA-A8-A07C | 0.0099005     | 0              | 0.06708752   | 0.0576974   | 0                 |
| TCGA-BH-A1FB | 0.1349695     | 0              | 0.02442675   | 0.06649263  | 0                 |
| TCGA-AN-A0FL | 0.0733814     | 0              | 0.00505769   | 0           | 0                 |
| TCGA-B6-A1KF | 0.0007641     | 0.004089494    | 0.0243853    | 0.00713253  | 0                 |
| TCGA-A8-A09A | 0.0120295     | 0              | 0            | 0.08984491  | 0                 |
| TCGA-XX-A89A | 0.0533578     | 0              | 0.00878141   | 0.04128442  | 0                 |
| TCGA-A2-A4S3 | 0.0624904     | 0              | 0.01082796   | 0.08033569  | 0                 |
| TCGA-A8-A09M | 0.0049172     | 0              | 0.08342706   | 0.06207335  | 0                 |
| TCGA-E9-A243 | 0.0585237     | 0              | 0.04818937   | 0.07003778  | 0                 |
| TCGA-EW-A1P4 | 0.0253807     | 0              | 0.01837392   | 0.17659669  | 0                 |
| TCGA-A7-A2KD | 0.095136      | 0              | 0            | 0.00877952  | 0                 |
| TCGA-E2-A1AZ | 0.1035016     | 0              | 0.00602687   | 0.03437055  | 0                 |
| TCGA-EW-A2FV | 0.0153041     | 0              | 0            | 0.01821941  | 0                 |
| TCGA-LL-A5YP | 0.0321467     | 0              | 0.08435167   | 0.03281076  | 0                 |
| TCGA-BH-A0C3 | 0.0939268     | 0              | 0            | 0.04491439  | 0                 |
| TCGA-BH-A0DG | 0.1060811     | 0              | 0.0296825    | 0.00014276  | 0                 |
| TCGA-A7-A6VW | 0.0440402     | 0              | 0.03808884   | 0.00667494  | 0                 |
| TCGA-E9-A1R4 | 0.0095997     | 0              | 0            | 0.02810206  | 0                 |
| TCGA-A7-A3J1 | 0.1182882     | 0              | 0.02293778   | 0.08567531  | 0                 |
| TCGA-GM-A2DA | 0.0805803     | 0              | 0.0431139    | 0.16565845  | 0                 |
| TCGA-AQ-A04H | 0.0901655     | 0              | 0.02036961   | 0.00501776  | 0                 |
| TCGA-C8-A8HR | 0.1012755     | 0              | 0.00230609   | 0.09983798  | 0                 |
| TCGA-A2-A1G1 | 0.0585813     | 0              | 0.02673692   | 0.03916909  | 0                 |

|              |           |             |            |            |             |
|--------------|-----------|-------------|------------|------------|-------------|
| TCGA-A2-A0YI | 0.0881116 | 0           | 0.03569206 | 0.03467264 | 0           |
| TCGA-D8-A1JG | 0.0688795 | 0           | 0.11707944 | 0.03101418 | 0           |
| TCGA-BH-A0B4 | 0.0823778 | 0           | 0.00527662 | 0.03761682 | 0           |
| TCGA-A8-A082 | 0.000465  | 0.003665137 | 0.00167301 | 0          | 0           |
| TCGA-OL-A5RU | 0.0935674 | 0           | 0.031343   | 0.04271765 | 0           |
| TCGA-E9-A1RF | 0.0110283 | 0           | 0          | 0.04778986 | 0           |
| TCGA-E2-A1IK | 0.0120927 | 0           | 0.05838951 | 0          | 0           |
| TCGA-A2-A0D4 | 0.0508674 | 0           | 0.01005027 | 0          | 0           |
| TCGA-A8-A06X | 0.062075  | 0           | 0.01849865 | 0.03123427 | 0           |
| TCGA-AC-A23H | 0.0498388 | 0           | 0.04011958 | 0          | 0           |
| TCGA-E9-A1R3 | 0.0348472 | 0           | 0          | 0.011827   | 0           |
| TCGA-D8-A1JC | 0.1049866 | 0           | 0.02813592 | 0          | 0           |
| TCGA-E9-A1N5 | 0.0701546 | 0           | 0.00808598 | 0.08995943 | 0           |
| TCGA-E9-A24A | 0.047981  | 0           | 0.00530813 | 0          | 0           |
| TCGA-HN-A2NL | 0.0623774 | 0           | 0.03962744 | 0.11024203 | 0           |
| TCGA-AN-A0FZ | 0.121534  | 0           | 0.03648321 | 0          | 0           |
| TCGA-E2-A14P | 0.0628013 | 0           | 0.0597451  | 0.04237475 | 0           |
| TCGA-AR-A256 | 0.012167  | 0           | 0          | 0          | 0           |
| TCGA-BH-A18I | 0.0385726 | 0           | 0          | 0.04079941 | 0           |
| TCGA-AR-A2LH | 0.0674366 | 0           | 0.01746255 | 0.04826949 | 0           |
| TCGA-D8-A27R | 0.0159921 | 0           | 0.10267638 | 0.11138788 | 0           |
| TCGA-AO-A03M | 0.141809  | 0           | 0.04168314 | 0          | 0           |
| TCGA-A8-A07W | 0.060997  | 0           | 0.00122001 | 0.02255446 | 0           |
| TCGA-LD-A66U | 0.0084636 | 0           | 0.05433209 | 0.16657094 | 0           |
| TCGA-E9-A22G | 0.055448  | 0           | 0.00842982 | 0.01760634 | 0           |
| TCGA-A2-A04P | 0.1046489 | 0           | 0.05375412 | 0.0463379  | 0           |
| TCGA-E9-A227 | 0.0599485 | 0           | 0.02557043 | 0.08837996 | 0           |
| TCGA-AC-A2FF | 0.1451324 | 0           | 0.06962471 | 0.07184128 | 0           |
| TCGA-B6-A0IN | 0.1187171 | 0           | 0.02004576 | 0.00649306 | 0           |
| TCGA-BH-A8FZ | 0.0982646 | 0           | 0.00706224 | 0.00137072 | 0           |
| TCGA-BH-A203 | 0.0152591 | 0           | 0.02781402 | 0.04425297 | 0           |
| TCGA-AO-A12C | 0.1007751 | 0           | 0.07740693 | 0          | 0           |
| TCGA-B6-A1KC | 0.0700558 | 0           | 0.03390345 | 0.01333173 | 0           |
| TCGA-A2-A3XX | 0.0968028 | 0           | 0.08858178 | 0.05417939 | 0           |
| TCGA-OL-A5D7 | 0.0910629 | 0           | 0.00095106 | 0.12747716 | 0           |
| TCGA-E9-A1RG | 0.0707625 | 0           | 0.01765671 | 0.06121603 | 0           |
| TCGA-A2-A0YF | 0         | 0.003692762 | 0.02219024 | 0          | 0           |
| TCGA-E9-A1NA | 0.0330993 | 0           | 0          | 0.00886619 | 0           |
| TCGA-A7-A0CG | 0.1099671 | 0           | 0.0400521  | 0.05370648 | 0           |
| TCGA-EW-A6SD | 0.0560873 | 0           | 0.09113095 | 0.06487449 | 0           |
| TCGA-C8-A12U | 0.0286664 | 0           | 0.01608507 | 0.18828365 | 0           |
| TCGA-AQ-A54O | 0.038898  | 0           | 0          | 0.02188631 | 0           |
| TCGA-A2-A3XW | 0.0145601 | 0           | 0.00349711 | 0.0266294  | 0           |
| TCGA-BH-A6R8 | 0.1007624 | 0           | 0.02513564 | 0.01492774 | 0           |
| TCGA-BH-A0EE | 0.0751019 | 0           | 0.06740139 | 0.03308001 | 0           |
| TCGA-A8-A08L | 0.094811  | 0           | 0          | 0.07141641 | 0           |
| TCGA-GM-A2DL | 0.0275725 | 0           | 0.03435843 | 0          | 0           |
| TCGA-E9-A1NI | 0.0498013 | 0           | 0          | 0          | 0           |
| TCGA-LL-A50Y | 0.0803443 | 0           | 0.01889487 | 0.08591867 | 0           |
| TCGA-BH-A0BP | 0.0024923 | 0.007294673 | 0.00676157 | 0          | 0           |
| TCGA-AR-A1AS | 0.0001663 | 0.008885538 | 0          | 0          | 0           |
| TCGA-BH-A0RX | 0.0913055 | 0           | 0.02237172 | 0.09417761 | 0           |
| TCGA-AR-A1AK | 0.1045761 | 0           | 0.00150364 | 0.05056447 | 0           |
| TCGA-B6-A1KN | 0.1822209 | 0           | 0.01883669 | 0.15721893 | 0.007625008 |
| TCGA-AC-A5XS | 0.0654336 | 0           | 0.036276   | 0.06974052 | 0           |
| TCGA-A2-A0T3 | 0.075371  | 0           | 0.00391251 | 0.06887209 | 0           |
| TCGA-AR-A2LO | 0.1458318 | 0           | 0.05247251 | 0.11656098 | 0           |
| TCGA-E2-A1L7 | 0.062384  | 0           | 0.01694492 | 0.17188986 | 0           |

|              |           |             |            |            |   |
|--------------|-----------|-------------|------------|------------|---|
| TCGA-D8-A1XM | 0.0832935 | 0           | 0.00301451 | 0.05401557 | 0 |
| TCGA-AO-A0JE | 0.09378   | 0           | 0.0501987  | 0.05944628 | 0 |
| TCGA-AC-A6IX | 0.2094099 | 0           | 0.0103982  | 0.07412315 | 0 |
| TCGA-BH-A1EU | 0.1541005 | 0           | 0.00026996 | 0.04475329 | 0 |
| TCGA-BH-A0E6 | 0.1058897 | 0.005587499 | 0.1790684  | 0.04620467 | 0 |
| TCGA-A2-A0CX | 0.0701974 | 0           | 0.01488934 | 0.00228526 | 0 |
| TCGA-3C-AALI | 0.0816631 | 0           | 0.00880108 | 0.10749473 | 0 |
| TCGA-A8-A07P | 0.0682121 | 0           | 0.11057298 | 0.01878622 | 0 |
| TCGA-A8-A09I | 0.0099293 | 0           | 0          | 0.05560092 | 0 |
| TCGA-A2-A04T | 0.1107625 | 0           | 0.01141977 | 0.07218574 | 0 |
| TCGA-E2-A152 | 0.0597091 | 0           | 0.07690098 | 0          | 0 |
| TCGA-AC-A3W6 | 0.0726907 | 0           | 0.00535975 | 0.09319028 | 0 |
| TCGA-BH-A0BG | 0.1270271 | 0           | 0.00812946 | 0.123299   | 0 |
| TCGA-A8-A096 | 0.0393379 | 0           | 0.00363401 | 0.0334849  | 0 |
| TCGA-AR-A2LL | 0.0305354 | 0           | 0.0201826  | 0          | 0 |
| TCGA-A2-A0D0 | 0.0482907 | 0           | 0          | 0.01067629 | 0 |
| TCGA-AN-A0AL | 0.1494266 | 0           | 0.08864772 | 0          | 0 |
| TCGA-AO-A0JL | 0.126749  | 0           | 0.04716371 | 0.01418416 | 0 |
| TCGA-C8-A12P | 0.0615256 | 0           | 0.04815835 | 0          | 0 |
| TCGA-E2-A153 | 0         | 0.005106021 | 0          | 0          | 0 |
| TCGA-BH-A1FN | 0.0814958 | 0           | 0.00555405 | 0          | 0 |
| TCGA-AC-A3YI | 0.0572637 | 0           | 0.04144351 | 0.00489833 | 0 |
| TCGA-AR-A5QM | 0.0902691 | 0           | 0.02038724 | 0.01294233 | 0 |
| TCGA-C8-A275 | 0.043809  | 0           | 0.02505267 | 0          | 0 |
| TCGA-AC-A62Y | 0.0266069 | 0           | 0          | 0          | 0 |
| TCGA-A2-A0EV | 0.1181848 | 0           | 0.03914031 | 0.01220724 | 0 |
| TCGA-C8-A1HG | 0.0081876 | 0           | 0.14582523 | 0.11153396 | 0 |
| TCGA-AO-A12D | 0.048556  | 0           | 0.0691632  | 0.06050489 | 0 |
| TCGA-GM-A2DD | 0.0614402 | 0           | 0.00218475 | 0.08373279 | 0 |
| TCGA-C8-A132 | 0.1508574 | 0           | 0.00851068 | 0.06858369 | 0 |
| TCGA-B6-A402 | 0.0010473 | 0.009383695 | 0.00403815 | 0          | 0 |
| TCGA-C8-A26Y | 0.11098   | 0           | 0          | 0.04536113 | 0 |
| TCGA-AN-A0XU | 0.1132776 | 0           | 0.06897306 | 0.0767478  | 0 |
| TCGA-LL-A5YO | 0.1182499 | 0           | 0          | 0.14999133 | 0 |
| TCGA-LL-A7T0 | 0.0457943 | 0           | 0.10653212 | 0          | 0 |
| TCGA-AN-A046 | 0.0310957 | 0           | 0          | 0.08919571 | 0 |
| TCGA-E2-A9RU | 0         | 0.001772036 | 0.01206345 | 0.02095817 | 0 |
| TCGA-E2-A150 | 0.0793924 | 0           | 0          | 0          | 0 |
| TCGA-A1-A0SI | 0.0500222 | 0           | 0.02664042 | 0.00897877 | 0 |
| TCGA-Z7-A8R5 | 0.04581   | 0           | 0          | 0.08348115 | 0 |
| TCGA-AR-A0TW | 0.0179151 | 0           | 0.10646663 | 0.11016684 | 0 |
| TCGA-AN-A0FN | 0.1340756 | 0           | 0.01664256 | 0.03940707 | 0 |
| TCGA-EW-A1P8 | 0.0323581 | 0           | 0.00447037 | 0.02851083 | 0 |
| TCGA-E2-A14N | 0.0669156 | 0           | 0          | 0.05381    | 0 |
| TCGA-BH-A0GY | 0.0410566 | 0           | 0          | 0          | 0 |
| TCGA-BH-A0DQ | 0.0558653 | 0           | 0.03429943 | 0          | 0 |
| TCGA-AR-A1AI | 0.0540731 | 0           | 0.07441676 | 0.04953131 | 0 |
| TCGA-PL-A8LV | 0.1263762 | 0           | 0.10448823 | 0.06997026 | 0 |
| TCGA-A1-A0SP | 0.0723149 | 0           | 0.02431997 | 0.02177854 | 0 |
| TCGA-AO-A0JI | 0.1076498 | 0           | 0.09481521 | 0.03025395 | 0 |
| TCGA-A2-A0YH | 0.0088577 | 0           | 0.06157323 | 0.03350006 | 0 |
| TCGA-A7-A4SA | 0.1177686 | 0           | 0.0042555  | 0.11798405 | 0 |
| TCGA-BH-A0B2 | 0.1209036 | 0           | 0          | 0.02274055 | 0 |
| TCGA-AR-A0TX | 0.0935294 | 0           | 0.01701828 | 0          | 0 |
| TCGA-AC-A2FO | 0.1472969 | 0           | 0.02360931 | 0.06794385 | 0 |
| TCGA-GM-A2DH | 0.1664629 | 0           | 0          | 0.01551357 | 0 |
| TCGA-AC-A3BB | 0.1148047 | 0           | 0.05939201 | 0.14440218 | 0 |
| TCGA-OK-A5Q2 | 0.2400674 | 0           | 0.00874337 | 0.0741996  | 0 |

|              |           |             |            |            |             |
|--------------|-----------|-------------|------------|------------|-------------|
| TCGA-AO-A0J6 | 0         | 0           | 0.0024511  | 0.11891961 | 0           |
| TCGA-E2-A3DX | 0.1144809 | 0           | 0.0204416  | 0.16214069 | 0           |
| TCGA-A8-A0A6 | 0.0994965 | 0           | 0.05448518 | 0.0236389  | 0           |
| TCGA-GI-A2C8 | 0.0705364 | 0           | 0          | 0          | 0           |
| TCGA-C8-A12Q | 0.0498203 | 0           | 0          | 0          | 0           |
| TCGA-C8-A1HF | 0.0079707 | 0           | 0.06678926 | 0.07773535 | 0           |
| TCGA-EW-A1J6 | 0.2103409 | 0           | 0.02570776 | 0          | 0           |
| TCGA-A2-A04V | 0.0174726 | 0           | 0          | 0.0246658  | 0           |
| TCGA-AC-A2FE | 0.0613716 | 0           | 0.0079496  | 0.1546163  | 0           |
| TCGA-A8-A075 | 0         | 0           | 0.13426366 | 0          | 0           |
| TCGA-AO-A03T | 0.099669  | 0           | 0.08812879 | 0.03589384 | 0           |
| TCGA-E2-A1IF | 0.0977861 | 0           | 0.01675111 | 0.03870864 | 0           |
| TCGA-D8-A141 | 0.0975392 | 0           | 0.0009123  | 0.07314879 | 0           |
| TCGA-AC-A23G | 0.0443818 | 0           | 0          | 0.03457459 | 0           |
| TCGA-A2-A0T4 | 0.1073375 | 0           | 0          | 0.03155318 | 0           |
| TCGA-AO-A0J8 | 0.084144  | 0           | 0          | 0.016168   | 0           |
| TCGA-E9-A22A | 0.0616369 | 0           | 0.03023055 | 0.05623679 | 0           |
| TCGA-E2-A14T | 0.0510205 | 0           | 0.01877566 | 0.02012884 | 0           |
| TCGA-BH-A0HB | 0.0539374 | 0           | 0.00398191 | 0.06090279 | 0           |
| TCGA-A2-A0EN | 0.1232466 | 0           | 0          | 0.07436968 | 0           |
| TCGA-BH-A1FC | 0.0481103 | 0           | 0.20694457 | 0.02915136 | 0           |
| TCGA-AR-A252 | 0.0211214 | 0           | 0.08491098 | 0.05095737 | 0           |
| TCGA-AC-A5XU | 0.0455494 | 0           | 0.18037191 | 0.01252527 | 0           |
| TCGA-E2-A15A | 0.1800632 | 0           | 0          | 0          | 0           |
| TCGA-B6-A0WS | 0.0862211 | 0           | 0.02962785 | 0.02454307 | 0           |
| TCGA-E9-A1NE | 0.0911628 | 0           | 0.01014198 | 0.10549545 | 0           |
| TCGA-A2-A0D2 | 0.0911066 | 0           | 0.02943069 | 0.06495529 | 0           |
| TCGA-A2-A0CM | 0.0154802 | 0           | 0          | 0.03719453 | 0           |
| TCGA-A8-A08Z | 0.0318847 | 0           | 0.00020088 | 0.01538228 | 0           |
| TCGA-AC-A8OQ | 0.0499368 | 0           | 0.18551582 | 0.01135856 | 0           |
| TCGA-A8-A07I | 0.0341197 | 0           | 0.06081551 | 0.01145013 | 0           |
| TCGA-A2-A25D | 0.1263995 | 0           | 0          | 0.0300271  | 0           |
| TCGA-AO-A0J4 | 0.133907  | 0           | 0.01824719 | 0.00787116 | 0           |
| TCGA-BH-A0AY | 0.0447086 | 0           | 0.04138151 | 0.05731821 | 0           |
| TCGA-AN-A0XW | 0.0668066 | 0           | 0          | 0          | 0           |
| TCGA-E2-A1LA | 0.0422433 | 0           | 0.01905684 | 0.11779435 | 0           |
| TCGA-AR-A1AT | 0.0712509 | 0           | 0.01057782 | 0.08453653 | 0           |
| TCGA-AC-A3OD | 0.0562798 | 0           | 0.03190931 | 0.00782438 | 0           |
| TCGA-E2-A14Z | 0.0832064 | 0           | 0          | 0.02057193 | 0           |
| TCGA-BH-A1FU | 0.1001116 | 0           | 0          | 0.0103822  | 0           |
| TCGA-AR-A0U0 | 0.0572918 | 0           | 0.0752297  | 0.03391323 | 0           |
| TCGA-LL-A740 | 0.037058  | 0           | 0.00429499 | 0          | 0           |
| TCGA-A8-A09X | 0.1164683 | 0           | 0.04096315 | 0.04946289 | 0           |
| TCGA-E2-A1LE | 0.081141  | 0           | 0          | 0.09241036 | 0           |
| TCGA-A2-A0YK | 0.1423119 | 0           | 0.01160481 | 0.13325624 | 0           |
| TCGA-BH-A1F6 | 0.0574623 | 0           | 0.03646213 | 0.03786225 | 0           |
| TCGA-E2-A573 | 0.0985567 | 0           | 0.08889483 | 0          | 0           |
| TCGA-AR-A0TP | 0.0003451 | 0.005370548 | 0          | 0          | 0           |
| TCGA-LL-A7SZ | 0.0227727 | 0           | 0.31696012 | 0.08824312 | 0           |
| TCGA-AO-A03R | 0.0349745 | 0.003387035 | 0          | 0.10186717 | 0.031313185 |
| TCGA-BH-A0DH | 0.0211895 | 0           | 0.23206286 | 0          | 0           |
| TCGA-EW-A2FW | 0.1005076 | 0           | 0.14537319 | 0          | 0           |
| TCGA-E9-A3X8 | 0.0115498 | 0           | 0.15900652 | 0.15769977 | 0           |
| TCGA-XX-A899 | 0.1083643 | 0.00895671  | 0          | 0.0660237  | 0           |
| TCGA-A2-A04X | 0.0212268 | 0           | 0.05568138 | 0.01497868 | 0           |
| TCGA-BH-A18K | 0.0809822 | 0           | 0.00979892 | 0.0127597  | 0           |
| TCGA-A8-A097 | 0.091411  | 0           | 0          | 0          | 0           |
| TCGA-A7-A4SD | 0.0449356 | 0           | 0.10277006 | 0.05680936 | 0           |

|              |           |             |            |            |   |
|--------------|-----------|-------------|------------|------------|---|
| TCGA-B6-A0IA | 0.1313438 | 0           | 0          | 0          | 0 |
| TCGA-E2-A15M | 0.0661712 | 0           | 0.01211668 | 0.00906298 | 0 |
| TCGA-BH-A0DI | 0.0781981 | 0           | 0.05816878 | 0.00125264 | 0 |
| TCGA-BH-A0DZ | 0.0301379 | 0           | 0.12259584 | 0.02468999 | 0 |
| TCGA-A2-A3Y0 | 0.0063357 | 0.004619021 | 0.00588628 | 0.17489357 | 0 |
| TCGA-BH-A1EY | 0.0527304 | 0           | 0          | 0.02704491 | 0 |
| TCGA-GM-A2DN | 0.0448116 | 0           | 0.09139534 | 0.05840537 | 0 |
| TCGA-A2-A0T1 | 0.0509355 | 0           | 0.05780374 | 0.02837819 | 0 |
| TCGA-BH-A18J | 0.0422539 | 0           | 0          | 0          | 0 |
| TCGA-A8-A09R | 0.0670902 | 0           | 0.00594897 | 0.04747947 | 0 |
| TCGA-LL-A73Z | 0.075445  | 0           | 0.00120673 | 0.05099327 | 0 |
| TCGA-A8-A09D | 0.078563  | 0           | 0.0084341  | 0.00279292 | 0 |
| TCGA-E2-A1B1 | 0.0934911 | 0           | 0          | 0.03779452 | 0 |
| TCGA-EW-A2FR | 0.0593825 | 0           | 0.04663867 | 0          | 0 |
| TCGA-BH-A18H | 0.112218  | 0           | 0.03431049 | 0.11345842 | 0 |
| TCGA-C8-A1HM | 0.0731914 | 0           | 0.03776334 | 0.13102009 | 0 |
| TCGA-AR-A0TQ | 0.0610852 | 0           | 0.01810404 | 0.08500185 | 0 |
| TCGA-AO-A1KQ | 0.0794394 | 0           | 0.01228832 | 0.16523952 | 0 |
| TCGA-C8-A12W | 0.0687681 | 0           | 0.16342567 | 0.01250983 | 0 |
| TCGA-BH-A0BL | 0.0966864 | 0           | 0.00684183 | 0.05152798 | 0 |
| TCGA-D8-A1XL | 0.0455174 | 0           | 0.00566595 | 0.01373678 | 0 |
| TCGA-AO-A0J9 | 0.0569357 | 0           | 1.50E-05   | 0.10133134 | 0 |
| TCGA-E2-A1LH | 0.0432602 | 0           | 0.05927666 | 0.07592028 | 0 |
| TCGA-AN-A0FV | 0.0239002 | 0           | 0          | 0          | 0 |
| TCGA-D8-A1J8 | 0.0469336 | 0           | 0          | 0.04441439 | 0 |
| TCGA-AR-A1AQ | 0.0265996 | 0           | 0.10310596 | 0.02174807 | 0 |
| TCGA-LL-A6FR | 0.0011366 | 0.007395906 | 0.00207865 | 0          | 0 |
| TCGA-BH-A0B7 | 0.071791  | 0           | 0.0085818  | 0.05302089 | 0 |
| TCGA-AO-A129 | 0.0967346 | 0           | 0.03310371 | 0.02541273 | 0 |
| TCGA-AR-A0TY | 0.1177066 | 0           | 0.09399503 | 0.02786601 | 0 |
| TCGA-BH-A1F0 | 0.0612605 | 0           | 0.03218184 | 0.02766022 | 0 |
| TCGA-AN-A0AT | 0.1020281 | 0           | 0.02438641 | 0.02285599 | 0 |
| TCGA-BH-A0BR | 0.0475726 | 0           | 0          | 0.02476565 | 0 |
| TCGA-E9-A22E | 0.0738724 | 0           | 0.00527914 | 0.05114364 | 0 |
| TCGA-AR-A1AX | 0.1424093 | 0           | 0          | 0.05418016 | 0 |
| TCGA-PL-A8LZ | 0.0718765 | 0           | 0          | 0          | 0 |
| TCGA-AR-A1AJ | 0.0149217 | 0.010636907 | 0.00537223 | 0.00569243 | 0 |
| TCGA-A8-A08X | 0.0565455 | 0           | 0.23703966 | 0          | 0 |
| TCGA-BH-A0BF | 0.1083349 | 0           | 0.08935417 | 0.04197013 | 0 |
| TCGA-A2-A0SW | 0.0660928 | 0           | 0.19351146 | 0.11139385 | 0 |
| TCGA-A7-A6VY | 0.0458181 | 0           | 0.08802682 | 0          | 0 |
| TCGA-E2-A159 | 0.0595363 | 0           | 0.05274477 | 0.09681241 | 0 |
| TCGA-E9-A1RB | 0.0900752 | 0           | 0          | 0.00283833 | 0 |
| TCGA-A8-A06Z | 0.0432337 | 0           | 0.05059699 | 0          | 0 |
| TCGA-BH-A18V | 0.061615  | 0           | 0          | 0.02354974 | 0 |
| TCGA-5L-AAT1 | 0.0647405 | 0           | 0.022474   | 0.13896296 | 0 |
| TCGA-D8-A1JL | 0.0343223 | 0           | 0          | 0          | 0 |
| TCGA-GM-A3XL | 0.0148739 | 0           | 0.08421564 | 0.01721726 | 0 |
| TCGA-A7-A4SE | 0.0411493 | 0           | 0.00043583 | 0          | 0 |
| TCGA-BH-A0HQ | 0.053657  | 0           | 0.04788805 | 0          | 0 |
| TCGA-AR-A254 | 0.0773943 | 0           | 0.02935733 | 0.03921219 | 0 |
| TCGA-D8-A1Y3 | 0.0428783 | 0           | 0          | 0.01912804 | 0 |
| TCGA-E9-A248 | 0.0335454 | 0           | 0.15042132 | 0.05391526 | 0 |
| TCGA-EW-A1IZ | 0.1185974 | 0           | 0.0349817  | 0.25263232 | 0 |
| TCGA-E2-A1II | 0.0231498 | 0           | 0          | 0.06209879 | 0 |
| TCGA-PE-A5DE | 0.0937484 | 0           | 0.01788321 | 0.15211382 | 0 |
| TCGA-D8-A1JJ | 0.0563167 | 0           | 0.07055045 | 0          | 0 |
| TCGA-BH-A0B3 | 0.0428579 | 0           | 0.15850934 | 0.06280569 | 0 |

|              |           |             |            |            |   |
|--------------|-----------|-------------|------------|------------|---|
| TCGA-D8-A1JB | 0.1658611 | 0           | 0          | 0.07752938 | 0 |
| TCGA-EW-A1P5 | 0.0077005 | 0           | 0          | 0          | 0 |
| TCGA-AQ-A04J | 0.2105296 | 0           | 0.01047234 | 0.02700498 | 0 |
| TCGA-E2-A1IH | 0.025262  | 0.022151814 | 0          | 0.10438688 | 0 |
| TCGA-D8-A73U | 0.0540648 | 0           | 0.04666958 | 0.0969093  | 0 |
| TCGA-BH-A0B9 | 0.0710711 | 0           | 0.00645864 | 0.11389521 | 0 |
| TCGA-EW-A3E8 | 0.0926669 | 0           | 0.02226219 | 0.06735837 | 0 |
| TCGA-AC-A3W5 | 0.0745301 | 0           | 0.00827511 | 0.03662486 | 0 |
| TCGA-AR-A0TT | 0.0826348 | 0           | 0.05894982 | 0.00700027 | 0 |
| TCGA-C8-A278 | 0.0970355 | 0           | 0.171537   | 0.01974325 | 0 |
| TCGA-BH-A2L8 | 0.0893208 | 0           | 0.01287111 | 0.18772229 | 0 |
| TCGA-E2-A108 | 0.0898406 | 0           | 0          | 0.15101041 | 0 |
| TCGA-D8-A27M | 0.1286811 | 0           | 0.0599046  | 0.04580871 | 0 |
| TCGA-BH-A0DS | 0.0875018 | 0           | 0.01798521 | 0.07666229 | 0 |
| TCGA-B6-A0IJ | 0.0320877 | 0           | 0.05770916 | 0.04288863 | 0 |
| TCGA-AC-A3HN | 0.0864581 | 0           | 0.02085026 | 0.03306565 | 0 |
| TCGA-D8-A27F | 0.0533584 | 0           | 0.00967134 | 0.00915936 | 0 |
| TCGA-AN-A0AS | 0         | 0.005494097 | 0.00191451 | 0          | 0 |
| TCGA-AN-A0FD | 0.0041427 | 0           | 0.00947125 | 0.01003702 | 0 |
| TCGA-E9-A1QZ | 0.0136796 | 0.042642222 | 0          | 0.04943111 | 0 |
| TCGA-AN-A0AJ | 0.0462552 | 0           | 0.01031048 | 0.09455271 | 0 |
| TCGA-AC-A2FB | 0.1067801 | 0           | 0.01242724 | 0.09769588 | 0 |
| TCGA-GM-A2DF | 0.062261  | 0           | 0.1130823  | 0.04216629 | 0 |
| TCGA-A8-A094 | 0.0856861 | 0           | 0.05359068 | 0.03118149 | 0 |
| TCGA-AC-A62V | 0.0301462 | 0           | 0          | 0.01930052 | 0 |
| TCGA-AO-A0JM | 0.0970558 | 0           | 0.08442046 | 0          | 0 |
| TCGA-EW-A3U0 | 0.0764632 | 0           | 0.02890528 | 0.06347834 | 0 |
| TCGA-C8-A12O | 0.0797514 | 0           | 0.0301493  | 0.00997306 | 0 |
| TCGA-AQ-A7U7 | 0.1225576 | 0           | 0.02769687 | 0.0562008  | 0 |
| TCGA-D8-A1XT | 0.0528556 | 0           | 0          | 0          | 0 |
| TCGA-A2-A3XZ | 0.2172126 | 0.019454623 | 0          | 0.06793981 | 0 |
| TCGA-BH-A0C0 | 0.0467593 | 0           | 0          | 0.0740196  | 0 |
| TCGA-BH-A0W7 | 0.0361005 | 0           | 0.02945006 | 0.04286975 | 0 |
| TCGA-D8-A1XQ | 0.0330319 | 0           | 0.10759984 | 0.02987773 | 0 |
| TCGA-EW-A1IY | 0.0275477 | 0           | 0.00298479 | 0          | 0 |
| TCGA-AR-A250 | 0.0535132 | 0           | 0.00861184 | 0          | 0 |
| TCGA-AC-A6IW | 0.0021789 | 0           | 0          | 0          | 0 |
| TCGA-AR-A24S | 0.0485612 | 0           | 0          | 0          | 0 |
| TCGA-3C-AALJ | 0.0835601 | 0           | 0.01416754 | 0.02910764 | 0 |
| TCGA-BH-A0DK | 0.0878586 | 0           | 0.02490064 | 0.10011708 | 0 |
| TCGA-GM-A2DK | 0.0563054 | 0           | 0.00683877 | 0.02413111 | 0 |
| TCGA-A8-A07J | 0.0637683 | 0           | 0          | 0          | 0 |
| TCGA-A8-A08F | 0.0061062 | 0           | 0          | 0.03904952 | 0 |
| TCGA-E9-A1N6 | 0.017117  | 0           | 0          | 0.0235849  | 0 |
| TCGA-A2-A0YM | 0.020871  | 0           | 0          | 0.02704788 | 0 |
| TCGA-GM-A2DB | 0.1179167 | 0           | 0.01330576 | 0.07016013 | 0 |
| TCGA-GM-A2DI | 0.0938846 | 0           | 0          | 0.15661556 | 0 |
| TCGA-BH-A0BC | 0.088606  | 0           | 0          | 0.04737435 | 0 |
| TCGA-AC-A23E | 0.0702164 | 0           | 0.02067901 | 0          | 0 |
| TCGA-D8-A27N | 0.0618351 | 0           | 0.04634953 | 0.008115   | 0 |
| TCGA-A8-A08I | 0.0682235 | 0           | 0.02221996 | 0.09146538 | 0 |
| TCGA-C8-A138 | 0.0628436 | 0           | 0.03663689 | 0.04949596 | 0 |
| TCGA-LD-A74U | 0.0564065 | 0           | 0          | 0.00490019 | 0 |
| TCGA-A2-A0EQ | 0.0797071 | 0           | 0.04989663 | 0.02481851 | 0 |
| TCGA-OL-A5S0 | 0.0454579 | 0           | 0.00936348 | 0.01933648 | 0 |
| TCGA-AN-A0XN | 0.0022796 | 0.001320216 | 0          | 0          | 0 |
| TCGA-AC-A5EH | 0.0379413 | 0           | 0          | 0.01513581 | 0 |
| TCGA-AO-A128 | 0.0368213 | 0           | 0          | 0.11687067 | 0 |

|              |           |             |            |            |             |
|--------------|-----------|-------------|------------|------------|-------------|
| TCGA-E9-A2JT | 0.332557  | 0.081539334 | 0          | 0.14606638 | 0           |
| TCGA-A8-A07U | 0.1044075 | 0           | 0.06200985 | 0.04319489 | 0           |
| TCGA-A2-A3XT | 0.0251772 | 0           | 0          | 0          | 0           |
| TCGA-E2-A1B6 | 0.0903459 | 0.041688605 | 0.0137075  | 0.14666441 | 0           |
| TCGA-BH-A0BZ | 0.0573562 | 0           | 0.04361739 | 0.00607    | 0           |
| TCGA-AR-A1AO | 0.01818   | 0           | 0          | 0          | 0           |
| TCGA-EW-A6SB | 0.0229035 | 0.005056688 | 0.23150617 | 0.07307841 | 0           |
| TCGA-E9-A1NC | 0.0469678 | 0           | 0.05570775 | 0          | 0           |
| TCGA-E9-A228 | 0.0013233 | 0.002404962 | 0          | 0          | 0           |
| TCGA-AN-A0FF | 0.0339665 | 0           | 0.02438665 | 0          | 0.018697548 |
| TCGA-E9-A22D | 0.065815  | 0           | 0.01822498 | 0.16510492 | 0           |
| TCGA-A2-A0SX | 0.0288556 | 0           | 0.05011893 | 0.01215966 | 0           |
| TCGA-EW-A1P7 | 0.1782949 | 0.087556933 | 0.01482782 | 0.11681596 | 0           |
| TCGA-D8-A1Y2 | 0.0745892 | 0           | 0.00217178 | 0.00796141 | 0           |
| TCGA-E2-A10A | 0.0340456 | 0           | 0.03999983 | 0          | 0           |
| TCGA-BH-A0E1 | 0.0698388 | 0           | 0.045855   | 0.01300639 | 0           |
| TCGA-A8-A08R | 0.0188619 | 0           | 0.03961606 | 0          | 0           |
| TCGA-EW-A1OV | 0.1305648 | 0           | 0.02060668 | 0.13993275 | 0           |
| TCGA-A8-A08P | 0.02812   | 0           | 0          | 0.02104742 | 0           |
| TCGA-LL-A73Y | 0.0683038 | 0           | 0.00433986 | 0          | 0           |
| TCGA-BH-A0B6 | 0.0443058 | 0           | 0.02889826 | 0.15852094 | 0           |
| TCGA-AR-A24Q | 0.0526789 | 0           | 0.08463925 | 0.02112135 | 0           |
| TCGA-A7-A56D | 0.0006242 | 0           | 0.07652046 | 0.00927352 | 0           |
| TCGA-AR-A0TS | 0.2332897 | 0           | 0.01532132 | 0.02405686 | 0           |
| TCGA-B6-A401 | 0.0458061 | 0.006627656 | 0          | 0          | 0           |
| TCGA-E2-A1B5 | 0.1113824 | 0           | 0.02033794 | 0.11590787 | 0           |
| TCGA-B6-A400 | 0.0065811 | 0           | 0          | 0          | 0           |
| TCGA-A2-A3XY | 0.0523504 | 0           | 0          | 0          | 0           |
| TCGA-C8-A27B | 0.0410135 | 0           | 0.02606231 | 0.03919694 | 0           |
| TCGA-C8-A12V | 0.082808  | 0           | 0.02452979 | 0.08323416 | 0           |
| TCGA-BH-A0BW | 0.0692707 | 0           | 0.01524692 | 0.0109465  | 0           |
| TCGA-A2-A25F | 0.052641  | 0           | 0          | 0.03922843 | 0           |
| TCGA-C8-A26X | 0.0575535 | 0           | 0.11902017 | 0          | 0           |
| TCGA-BH-A0W5 | 0.254664  | 0           | 0.00702083 | 0.04808569 | 0           |
| TCGA-E9-A1NG | 0.0315256 | 0           | 0.00237572 | 0          | 0           |
| TCGA-S3-AA17 | 0.0890448 | 0           | 0.06186706 | 0.01708257 | 0           |
| TCGA-A2-A0CR | 0.083495  | 0           | 0.00342095 | 0.18774804 | 0           |
| TCGA-E2-A14R | 0.0519673 | 0           | 0.07807142 | 0.05268509 | 0           |
| TCGA-AO-A0JC | 0.2848126 | 0.016225167 | 0          | 0.12835374 | 0           |
| TCGA-A7-A6VV | 0.0467538 | 0           | 0.01097064 | 0          | 0           |
| TCGA-B6-A3ZX | 0.339772  | 0           | 0.00893385 | 0.10957416 | 0           |
| TCGA-BH-A0AV | 0.0543369 | 0           | 0.02254811 | 0          | 0           |
| TCGA-AR-A0TU | 0.0130152 | 0           | 0          | 0.06712245 | 0           |
| TCGA-A8-A090 | 0.0379924 | 0           | 0.00757538 | 0.00841313 | 0           |
| TCGA-C8-A134 | 0.0759181 | 0           | 0.00727947 | 0.0415222  | 0           |
| TCGA-BH-A0DX | 0.0210228 | 0           | 0.0002952  | 0          | 0           |
| TCGA-LL-A441 | 0.2686383 | 0.027412373 | 0          | 0.01433316 | 0           |
| TCGA-B6-A0I2 | 0.0589686 | 0           | 0.0341413  | 0.1552258  | 0           |
| TCGA-WT-AB41 | 0.0760169 | 0           | 0.04309597 | 0.15786062 | 0           |
| TCGA-JL-A3YW | 0.0434877 | 0           | 0.00341596 | 0          | 0           |
| TCGA-A8-A07O | 0.0479217 | 0           | 0.00117017 | 0.02748855 | 0           |
| TCGA-A8-A08J | 0.0651778 | 0           | 0.11825257 | 0.01537213 | 0           |
| TCGA-OL-A5RY | 0.1721076 | 0           | 0.02554924 | 0.07039505 | 0           |
| TCGA-E9-A3QA | 0.0741779 | 0           | 0          | 0.05409731 | 0           |
| TCGA-AR-A1AR | 0.0131368 | 0           | 0          | 0          | 0           |
| TCGA-A2-A04Q | 0.0804139 | 0           | 0.04851762 | 0.10660553 | 0           |
| TCGA-E9-A1N4 | 0.0527895 | 0           | 0.00072745 | 0.00614951 | 0           |
| TCGA-GM-A2DC | 0.2231369 | 0           | 0.01716904 | 0.12695411 | 0           |

|              |           |             |            |            |   |
|--------------|-----------|-------------|------------|------------|---|
| TCGA-B6-A0RT | 0.0729783 | 0           | 0.00091336 | 0.10773926 | 0 |
| TCGA-E9-A1NF | 0.0482641 | 0           | 0.00145204 | 0          | 0 |
| TCGA-C8-A12K | 0.0298702 | 0           | 0.01113039 | 0.07601056 | 0 |
| TCGA-BH-A209 | 0.0830187 | 0           | 0.02565495 | 0.08938891 | 0 |
| TCGA-BH-A8G0 | 0.139494  | 0.017693032 | 0          | 0.00304391 | 0 |
| TCGA-A2-A0CZ | 0.0410292 | 0           | 0.05016039 | 0.0327846  | 0 |
| TCGA-A2-A0ST | 0.0679182 | 0.001831622 | 0.04366982 | 0.09827819 | 0 |
| TCGA-LL-A6FQ | 0.0431769 | 0           | 0.004828   | 0.01990408 | 0 |
| TCGA-LL-A8F5 | 0.0471416 | 0           | 0.23964585 | 0          | 0 |
| TCGA-A2-A0CL | 0.1153181 | 0           | 0.00693814 | 0.08572203 | 0 |
| TCGA-AQ-A0Y5 | 0.069076  | 0           | 0.10834784 | 0          | 0 |
| TCGA-E9-A5FK | 0.1218379 | 0           | 0.01932069 | 0.19888241 | 0 |
| TCGA-A8-A0A1 | 0.0455984 | 0           | 0          | 0.01670894 | 0 |
| TCGA-OL-A66P | 0.0256584 | 0           | 0.18308254 | 0.20171319 | 0 |
| TCGA-LL-A5YN | 0.1498061 | 0           | 0          | 0.11057385 | 0 |
| TCGA-OL-A66I | 0.0028455 | 0           | 0.01025893 | 0.20284548 | 0 |
| TCGA-LL-A5YM | 0.0006643 | 0           | 0.11350666 | 0.00621809 | 0 |
| TCGA-LD-A9QF | 0.0480573 | 0           | 0          | 0.07032341 | 0 |
| TCGA-BH-A0AW | 0.0759989 | 0           | 0.02184995 | 0.08108276 | 0 |
| TCGA-A8-A06R | 0         | 0           | 0.13166197 | 0          | 0 |
| TCGA-AR-A0U4 | 0         | 0           | 0.00183501 | 0.01123401 | 0 |
| TCGA-E2-A1L9 | 0.0014265 | 0.005979901 | 0          | 0          | 0 |
| TCGA-BH-A5J0 | 0.0547375 | 0           | 0.01569824 | 0.04702143 | 0 |
| TCGA-E9-A1ND | 0.0091778 | 0           | 0          | 0.02555058 | 0 |
| TCGA-AO-A03N | 0.1124278 | 0           | 0.04055922 | 0          | 0 |
| TCGA-AR-A1AN | 0.025369  | 0           | 0.00236944 | 0.05270769 | 0 |
| TCGA-E2-A1L6 | 0.0234843 | 0           | 0.00212813 | 0          | 0 |
| TCGA-LL-A440 | 0.0350988 | 0           | 0          | 0.00623813 | 0 |
| TCGA-S3-AA15 | 0.1446641 | 0           | 0.24325992 | 0.05253274 | 0 |
| TCGA-AR-A1AW | 0.0860818 | 0           | 0.08800047 | 0.03314035 | 0 |
| TCGA-D8-A13Z | 0.0828189 | 0           | 0          | 0          | 0 |
| TCGA-BH-A0HF | 0.0687389 | 0           | 0.01212788 | 0          | 0 |
| TCGA-BH-A0H5 | 0.0657402 | 0           | 0.02415786 | 0.08389558 | 0 |
| TCGA-A8-A08H | 0.0269271 | 0           | 0          | 0.01772302 | 0 |
| TCGA-A8-A0A7 | 0.0709679 | 0           | 0.06951039 | 0.09154533 | 0 |
| TCGA-A2-A0EP | 0.092007  | 0           | 0          | 0.03216269 | 0 |
| TCGA-AR-A2LJ | 0.0215761 | 0           | 0.00073548 | 0.02863394 | 0 |
| TCGA-A7-A13H | 0.056479  | 0           | 0.01370093 | 0.01539741 | 0 |
| TCGA-EW-A1PB | 0.0552629 | 0           | 0          | 0.0760916  | 0 |
| TCGA-S3-AA10 | 0.0708483 | 0           | 0.03701382 | 0.09768513 | 0 |



| T cells CD4 memory resting | T cells CD4 memory activated | T cells follicular helper |
|----------------------------|------------------------------|---------------------------|
| 0.297944733                | 0.019112609                  | 0                         |
| 0.223788619                | 0                            | 0.030086359               |
| 0.371995809                | 0                            | 0                         |
| 0.186434995                | 0                            | 0.030356892               |
| 0.227499495                | 0                            | 0.118785901               |
| 0.323420968                | 0                            | 0.009296051               |
| 0.232657731                | 0.012081963                  | 0.016932654               |
| 0.339908971                | 0                            | 0.053798354               |
| 0.102828821                | 0                            | 0.029211344               |
| 0.176179534                | 0                            | 0.070606966               |
| 0.353373061                | 0.004749285                  | 0.020674642               |
| 0.252636752                | 0                            | 0                         |
| 0.248626566                | 0                            | 0.047334554               |
| 0.345045195                | 0.002536583                  | 0                         |
| 0.20017986                 | 0                            | 0.010365036               |
| 0.26425548                 | 0                            | 0                         |
| 0.335217657                | 0                            | 0.038825497               |
| 0.127962772                | 0                            | 0.023290463               |
| 0.214967792                | 0                            | 0.0412968                 |
| 0.273556942                | 0                            | 0.04685336                |
| 0.225735956                | 0                            | 0.031197068               |
| 0.251051519                | 0.004758978                  | 0.014289513               |
| 0.191383469                | 0                            | 0.075053631               |
| 0.199360999                | 0                            | 0.018341195               |
| 0.402114558                | 0.005181243                  | 0                         |
| 0.146083053                | 0                            | 0.026161303               |
| 0.31799458                 | 0                            | 0.008879814               |
| 0.312891301                | 0                            | 0.004566775               |
| 0.311115454                | 0                            | 0.005366575               |
| 0.17634867                 | 0                            | 0.015785369               |
| 0.229110661                | 0.003066393                  | 0.013265357               |
| 0.188307441                | 0                            | 0.020014805               |
| 0.300288575                | 0                            | 0.004335119               |
| 0.270991035                | 0.016816905                  | 0                         |
| 0.326202228                | 0.008181628                  | 0.039669702               |
| 0.37756071                 | 0.018494939                  | 0                         |
| 0.200613076                | 0                            | 0.008801499               |
| 0.1985739                  | 0                            | 0.043656687               |
| 0.234891581                | 0                            | 0                         |
| 0.395188497                | 0.00387837                   | 0                         |
| 0.25086333                 | 0.006114541                  | 0.047752945               |
| 0.286882171                | 0                            | 0                         |
| 0.345896194                | 0.0242574                    | 0                         |
| 0.218380545                | 0.058555106                  | 0.009904823               |
| 0.257932223                | 0                            | 0.044298792               |
| 0.415734119                | 0.032736963                  | 0.030093425               |
| 0.455606555                | 0                            | 0.050304388               |
| 0.25964741                 | 0                            | 0.042198917               |
| 0.399291608                | 0                            | 0                         |
| 0.339453457                | 0                            | 0.020036177               |
| 0.099489241                | 0                            | 0.054798099               |
| 0.310339626                | 0.015921938                  | 0.010829469               |
| 0.418318241                | 0.009328635                  | 0                         |
| 0.366460967                | 0                            | 0.005364358               |
| 0.206711079                | 0                            | 0.022741527               |
| 0.2434559                  | 0                            | 0.022874809               |
| 0.270886011                | 0.043195227                  | 0.024375939               |

|             |             |             |
|-------------|-------------|-------------|
| 0.288799662 | 0.009084401 | 0.005918973 |
| 0.303000368 | 0.01978362  | 0.000315782 |
| 0.30834972  | 0           | 0.010447874 |
| 0.31572948  | 0.000518992 | 0.012922411 |
| 0.335543427 | 0           | 0           |
| 0.318333366 | 0           | 0.052052394 |
| 0.329918832 | 0           | 0.006896513 |
| 0.39065315  | 0           | 0.053040151 |
| 0.153972323 | 0.001140756 | 0.078685557 |
| 0.080957145 | 0           | 0.039472677 |
| 0.278059295 | 0           | 0.008489079 |
| 0.222309088 | 0           | 0.042295832 |
| 0.261251072 | 0           | 0.014518184 |
| 0.225290294 | 0           | 0.00617164  |
| 0.220274134 | 0           | 0.048332693 |
| 0.066251836 | 0           | 0.02842003  |
| 0.313977901 | 0           | 0.040960326 |
| 0.299591565 | 0           | 0.058130742 |
| 0.361091438 | 0           | 0.005020731 |
| 0.482859991 | 0           | 0           |
| 0.219245737 | 0           | 0           |
| 0.262160463 | 0.00604789  | 0.066623004 |
| 0.185085878 | 0           | 0.022906131 |
| 0.271941918 | 0           | 0.037306776 |
| 0.17845843  | 0.01146998  | 0.083156729 |
| 0.326004723 | 0           | 0.038751962 |
| 0.391053493 | 0.011933076 | 0           |
| 0.349635242 | 0.006867769 | 0           |
| 0.301479387 | 0.007852587 | 0.009431255 |
| 0.235269508 | 0.019484101 | 0.026209895 |
| 0.203101947 | 0           | 0.032564375 |
| 0.055941512 | 0           | 0.017453394 |
| 0.095275334 | 0           | 0.011173972 |
| 0.149608461 | 0.013083045 | 0.028431275 |
| 0.253718011 | 0.022200462 | 0.061850031 |
| 0.127554464 | 0           | 0.022786769 |
| 0.197183814 | 0           | 0.033673387 |
| 0.212352623 | 0           | 0.005052895 |
| 0.473548948 | 0.010403961 | 0           |
| 0.224736519 | 0.019553774 | 0.040945688 |
| 0.194143136 | 0.059156273 | 0.044998448 |
| 0.075661017 | 0           | 0.119724239 |
| 0.210656467 | 0           | 0.008086895 |
| 0.18437981  | 0           | 0.05663543  |
| 0.232321395 | 0           | 0.040855194 |
| 0.344384099 | 0           | 0.030215336 |
| 0.186737974 | 0           | 0.018257312 |
| 0.137685525 | 0           | 0.029913708 |
| 0.16105387  | 0           | 0.016463489 |
| 0.175976655 | 0           | 0.03911066  |
| 0.325286224 | 0           | 0.008291245 |
| 0.224891965 | 0.062791781 | 0.026778601 |
| 0.317238953 | 0.004186833 | 0.053045194 |
| 0.193863253 | 0           | 0           |
| 0.342553923 | 0           | 0.000481323 |
| 0.193175313 | 0           | 0.068940084 |
| 0.365195133 | 0.003612242 | 0.024903065 |
| 0.3208427   | 0.010483835 | 0.019148283 |

|             |             |             |
|-------------|-------------|-------------|
| 0.336127542 | 0.012890631 | 0           |
| 0.265390163 | 0.020734797 | 0.04188408  |
| 0.389710261 | 0           | 0           |
| 0.404031323 | 0.000703392 | 0           |
| 0.068034796 | 0           | 0.033301346 |
| 0.307563756 | 0           | 0.037372311 |
| 0.308153148 | 0           | 0.04021079  |
| 0.191093778 | 0.00615088  | 0           |
| 0.267332202 | 0           | 0.104093249 |
| 0.301384948 | 0           | 0.087940582 |
| 0.190098316 | 0           | 0.001878903 |
| 0.361699581 | 0           | 0.008224861 |
| 0.225205367 | 0.023771452 | 0.058520402 |
| 0.369560744 | 0.001965881 | 0.022073163 |
| 0.12205917  | 0           | 0.025514198 |
| 0.314585271 | 0.012005462 | 0.081899069 |
| 0.295634468 | 0           | 0.005685994 |
| 0.103856582 | 0           | 0.053643435 |
| 0.282201847 | 0           | 0.021279347 |
| 0.230262531 | 0           | 0.014258388 |
| 0.117417497 | 0           | 0.070027201 |
| 0.09433704  | 0           | 0.007835824 |
| 0.174306712 | 0           | 0.009030516 |
| 0.318855647 | 0.01446942  | 0.049044695 |
| 0.170725394 | 0           | 0.021507472 |
| 0.232136228 | 0           | 0.021731997 |
| 0.286441466 | 0.035041768 | 0.02741144  |
| 0.359182708 | 0           | 0.018670813 |
| 0.408917015 | 0.032456596 | 0           |
| 0.331299662 | 0           | 0           |
| 0.159923571 | 0           | 0.060045924 |
| 0.119767991 | 0           | 0.063379787 |
| 0.099475095 | 9.86E-05    | 0.082115232 |
| 0.166034007 | 0           | 0.025159604 |
| 0.171913694 | 0           | 0.03014024  |
| 0.312515385 | 0.030184992 | 0.078647122 |
| 0.168800013 | 0           | 0.039114852 |
| 0.236001175 | 0           | 0.061212537 |
| 0.232275331 | 0           | 0.083346075 |
| 0.158786022 | 0           | 0.018630506 |
| 0.25620312  | 0.010523907 | 0.058480531 |
| 0.395206639 | 0.013358383 | 0.040124978 |
| 0.194325145 | 0           | 0.033988974 |
| 0.43344312  | 0.032820675 | 0.018721629 |
| 0.217357319 | 0           | 0.016844448 |
| 0.094224687 | 0           | 0.016956581 |
| 0.33725886  | 0.022534036 | 0.034170737 |
| 0.20219388  | 0           | 0.003038203 |
| 0.236326333 | 0           | 0.006248276 |
| 0.18690316  | 0           | 0           |
| 0.244647371 | 0.001826231 | 0.002531567 |
| 0.422541982 | 0.007672126 | 0           |
| 0.301604339 | 0           | 0.017630156 |
| 0.300305181 | 0.020941488 | 0.009227847 |
| 0.42415181  | 0.010787856 | 0           |
| 0.357169973 | 0           | 0.058357042 |
| 0.232671899 | 0           | 0.052562726 |
| 0.404834113 | 0.004528694 | 0           |

|             |             |             |
|-------------|-------------|-------------|
| 0.13759177  | 0           | 0.118463787 |
| 0.439658332 | 0.008415076 | 0           |
| 0.422268853 | 0           | 0.013797502 |
| 0.125537229 | 0           | 0.011821959 |
| 0.17613832  | 0           | 0.054581496 |
| 0.369307435 | 0.042684531 | 0.039135991 |
| 0.26551174  | 0.002445936 | 0.075671377 |
| 0.191536819 | 0           | 0.007954562 |
| 0.426193478 | 0.004994275 | 0.001600194 |
| 0.224228703 | 0           | 0           |
| 0.231442755 | 0           | 0.012429158 |
| 0.158382719 | 0           | 0.000335692 |
| 0.39072717  | 0           | 0.013600798 |
| 0.096821627 | 0           | 0.003428722 |
| 0.160136486 | 0           | 0.024204625 |
| 0.180069938 | 0           | 0.029845638 |
| 0.31254843  | 0.003766155 | 0.016383058 |
| 0.066865901 | 0           | 0.007686151 |
| 0.343590116 | 0.010713012 | 0.001495395 |
| 0.393807419 | 0           | 0.008838787 |
| 0.247167294 | 0.081404854 | 0.068572878 |
| 0.500010497 | 0.003364985 | 0           |
| 0.144568013 | 0           | 0.016931332 |
| 0.288247135 | 0           | 0.0057378   |
| 0.320256395 | 0           | 0.016784954 |
| 0.527800055 | 0.026744165 | 0           |
| 0.270881661 | 0.031156635 | 0           |
| 0.375405636 | 0.00372861  | 0.055682334 |
| 0.227755902 | 0           | 0           |
| 0.233840272 | 0.001909849 | 0.022405815 |
| 0.181933924 | 0           | 0.014758808 |
| 0.402475056 | 0.001260867 | 0.048506877 |
| 0.373800533 | 0           | 0.031339651 |
| 0.240746324 | 0           | 0.007544733 |
| 0.364215345 | 0.003195717 | 0.070107972 |
| 0.192636168 | 0.037078    | 0.043259753 |
| 0.348157542 | 0.003203955 | 0.00675478  |
| 0.568645102 | 0.011033417 | 0           |
| 0.333017148 | 0.018679505 | 0.04020215  |
| 0.376363904 | 0.010406804 | 0           |
| 0.233607548 | 0.023209381 | 0.048342214 |
| 0.151677157 | 0           | 0.024621985 |
| 0.310856446 | 0.011424642 | 9.26E-05    |
| 0.30653316  | 0           | 0.020252209 |
| 0.406409693 | 0.022728145 | 0.004022692 |
| 0.210654557 | 0.006419365 | 0.014349096 |
| 0.202363469 | 0           | 0.065953862 |
| 0.153126083 | 0           | 0.007185516 |
| 0.190622651 | 0.009119358 | 0.018267882 |
| 0.31232176  | 0           | 0           |
| 0.143385467 | 0           | 0           |
| 0.129927403 | 0           | 0.012912134 |
| 0.170264182 | 0           | 0.023746986 |
| 0.355955222 | 0.017694273 | 0           |
| 0.35824499  | 0           | 0.03253993  |
| 0.108003302 | 0           | 0.067617405 |
| 0.175679364 | 0           | 0.019660593 |
| 0.245513934 | 0.007339885 | 0.04763148  |

|             |             |             |
|-------------|-------------|-------------|
| 0.049000295 | 0           | 0.09851809  |
| 0.535052357 | 0.019743609 | 0           |
| 0.170811999 | 0           | 0.008340603 |
| 0.156026551 | 0.007336877 | 0.014008098 |
| 0.210912335 | 0           | 0.076845116 |
| 0.386073362 | 0.00365048  | 0.000283409 |
| 0.342640666 | 0.017637334 | 0           |
| 0.262139383 | 0.006477109 | 0.010871373 |
| 0.098486452 | 0           | 0.002353928 |
| 0.11788713  | 0.003760532 | 0.061796123 |
| 0.228840743 | 0           | 0.02353558  |
| 0.196791773 | 0           | 0.01056173  |
| 0.308876069 | 0.000220801 | 0.003938757 |
| 0.169375528 | 0           | 0.025746738 |
| 0.334701239 | 0.020431139 | 0           |
| 0.219161493 | 0.065723893 | 0.049721765 |
| 0.318658228 | 0.023103685 | 0           |
| 0.200391636 | 0.006243456 | 0.027531574 |
| 0.12666483  | 9.96E-05    | 0           |
| 0.290768486 | 0.040273885 | 0.037000511 |
| 0.378408598 | 0.000130226 | 0.047483631 |
| 0.220777875 | 0           | 0.003854613 |
| 0.253267977 | 0           | 0.068834371 |
| 0.042994718 | 0           | 0.0590058   |
| 0.300237458 | 0           | 0.108768164 |
| 0.252733573 | 0.010978132 | 0.069027699 |
| 0.116994613 | 0           | 0.02272966  |
| 0.392237975 | 0.020434453 | 0           |
| 0.324393208 | 0           | 0.041392575 |
| 0.130962897 | 0           | 0           |
| 0.315756226 | 0.02965282  | 0           |
| 0.238011475 | 0.002837141 | 0.021777337 |
| 0.188526562 | 0.001243692 | 0.024840846 |
| 0.182629938 | 0           | 0.011353067 |
| 0.279881442 | 0.007351169 | 0           |
| 0.315623676 | 0           | 0.080208156 |
| 0.346644062 | 0.02718593  | 0.03877617  |
| 0.205897504 | 0           | 0.007120539 |
| 0.264833425 | 0.013315041 | 0.038705771 |
| 0.236842263 | 0.00239562  | 0.008754139 |
| 0.151636064 | 0.00968126  | 0.064901883 |
| 0.310926031 | 0.034472924 | 0.002028424 |
| 0.113707919 | 0           | 0.063453235 |
| 0.152106512 | 0           | 0           |
| 0.283307751 | 0           | 0.059210646 |
| 0.223052889 | 0           | 0.029399003 |
| 0.329844112 | 0.003383321 | 0.076877981 |
| 0.264341901 | 0.020720985 | 0.06661648  |
| 0.224948162 | 0           | 0.048185001 |
| 0.085921354 | 0           | 0.001585539 |
| 0.306351972 | 0           | 0           |
| 0.155369433 | 0           | 0.059039011 |
| 0.300648869 | 0.024708482 | 0           |
| 0.219371725 | 0.001626404 | 0.056852294 |
| 0.386192228 | 0.028534423 | 0.07203907  |
| 0.369878971 | 0.006396652 | 0.00919181  |
| 0.105230577 | 0           | 0.019309482 |
| 0.1317405   | 0           | 0.04336346  |

|             |             |             |
|-------------|-------------|-------------|
| 0.254362797 | 0.005875333 | 0.056940907 |
| 0.2056651   | 0           | 0.057312011 |
| 0.428703411 | 0.009578188 | 0           |
| 0.308982083 | 0.002173257 | 0.053295789 |
| 0.308587108 | 0           | 0.019235252 |
| 0.233131057 | 0.016185505 | 0.067711454 |
| 0.335987934 | 0           | 0.003463053 |
| 0.204043244 | 0           | 0.027005356 |
| 0.264511706 | 0.00832585  | 0.019365416 |
| 0.20761635  | 0.018217226 | 0.020949852 |
| 0.26357636  | 0.027777556 | 0.040987381 |
| 0.259105433 | 0.009933384 | 0.048154994 |
| 0.224083954 | 0           | 0.054951275 |
| 0.172837988 | 0           | 0.014805241 |
| 0.188525428 | 0           | 0.028674201 |
| 0.153692517 | 0           | 0.033961702 |
| 0.200412307 | 0           | 0           |
| 0.159388546 | 0           | 0.020876849 |
| 0.170110275 | 0           | 0.038890017 |
| 0.5158513   | 0.000247306 | 0           |
| 0.228249594 | 0.036029406 | 0.047016192 |
| 0.406218776 | 0.052255971 | 0           |
| 0.179964938 | 0           | 0.034309302 |
| 0.19046456  | 0.018570612 | 0.01896144  |
| 0.069115661 | 0           | 0.000496191 |
| 0.097655233 | 0           | 0.045972894 |
| 0.286701973 | 0.007917392 | 0.015249318 |
| 0.146462601 | 0           | 0.047168932 |
| 0.417000572 | 0           | 0.038715601 |
| 0.123936043 | 0           | 0.04402074  |
| 0.261203433 | 0.006146872 | 0.029542778 |
| 0.208250165 | 0.005707879 | 0.065470209 |
| 0.272917677 | 0.001719391 | 0           |
| 0.218028113 | 0.011342723 | 0.018122364 |
| 0.515863537 | 0           | 0.04376497  |
| 0.260030147 | 0.00027217  | 0.031183361 |
| 0.276112426 | 0           | 0.059894118 |
| 0.259722295 | 0.008956474 | 0           |
| 0.291843253 | 0           | 0           |
| 0.345453684 | 0.013503262 | 0           |
| 0.187360099 | 0           | 0.017795577 |
| 0.137856097 | 0           | 0.009351341 |
| 0.23586293  | 0           | 0.001443335 |
| 0.163962573 | 0           | 0.046668117 |
| 0.184151521 | 0           | 0           |
| 0.237871887 | 0           | 0.00773632  |
| 0.34358387  | 0.045114834 | 0           |
| 0.166192984 | 0           | 0.016624862 |
| 0.145715544 | 0           | 0.02397154  |
| 0.176312476 | 0           | 0.003958631 |
| 0.179138258 | 0.002937371 | 0.010125777 |
| 0.129915875 | 0           | 0.039851826 |
| 0.099177946 | 0           | 0.005535305 |
| 0.3051072   | 0.006577306 | 0.034522863 |
| 0.143468158 | 0           | 0.026929477 |
| 0.13658874  | 0           | 0           |
| 0.172316647 | 0           | 0.043953916 |
| 0.17174808  | 0.051178574 | 0.054202973 |

|             |             |             |
|-------------|-------------|-------------|
| 0.250171907 | 0.011294674 | 0.013450336 |
| 0.256659509 | 0.023748842 | 0.046234018 |
| 0.143154112 | 0           | 0.017981152 |
| 0.29348415  | 0.041504394 | 0.014254499 |
| 0.355477029 | 0           | 0.011445237 |
| 0.105513475 | 0           | 0.014872694 |
| 0.200290735 | 0.009253788 | 0.086252262 |
| 0.288456824 | 0           | 0.027496561 |
| 0.191820538 | 0           | 0.006299835 |
| 0.115101132 | 0           | 0.047173885 |
| 0.228722609 | 0.08624477  | 0.022614006 |
| 0.351495429 | 0           | 0.01463696  |
| 0.266854778 | 0.013772988 | 0           |
| 0.157155462 | 0           | 0.00787648  |
| 0.159693614 | 0           | 0.018782543 |
| 0.13381617  | 0           | 0           |
| 0.223782475 | 0.003168604 | 0.003752747 |
| 0.321251517 | 0.016567205 | 0.015881297 |
| 0.327909586 | 0           | 0           |
| 0.274781521 | 0           | 0.014631791 |
| 0.220145963 | 0           | 0.013508253 |
| 0.224508262 | 0.002008274 | 0.012361506 |
| 0.03542456  | 0           | 0.016819551 |
| 0.382155901 | 0.003999397 | 0           |
| 0.114466182 | 0           | 0.144544839 |
| 0.436820463 | 0.012717336 | 0           |
| 0.141598514 | 0           | 0.034210839 |
| 0.273227889 | 0           | 0.033707775 |
| 0.212580664 | 0.026516782 | 0.033590239 |
| 0.234449054 | 0.012872687 | 0.056619452 |
| 0.253289245 | 0.019898793 | 0.038828473 |
| 0.435585287 | 0.033415725 | 0           |
| 0.188560092 | 0.007609314 | 0.033611224 |
| 0.372865072 | 0.015654189 | 0           |
| 0.204861735 | 0           | 0.004124472 |
| 0.316184034 | 0.00997464  | 0.002141362 |
| 0.284200232 | 0           | 0.017642044 |
| 0.123401146 | 0.001818231 | 0.096560184 |
| 0.361923227 | 0.023811105 | 0           |
| 0.11842266  | 0           | 0.027174271 |
| 0.215095028 | 0.004725657 | 0.054737937 |
| 0.119277266 | 0.00116626  | 0.003331965 |
| 0.205442155 | 0.042028935 | 0.069996208 |
| 0.117159879 | 0           | 0.022743676 |
| 0.142182807 | 0.012776731 | 0.03463973  |
| 0.107044731 | 0           | 0.008730457 |
| 0.203263354 | 0.009547454 | 0           |
| 0.123720223 | 0.00059848  | 0.084940476 |
| 0.172632116 | 0           | 0.055813886 |
| 0.15837084  | 0           | 0.03620466  |
| 0.160464768 | 0           | 0           |
| 0.100833917 | 0           | 0.01173248  |
| 0.356032688 | 0.016326641 | 0           |
| 0.225357196 | 0.027697917 | 0.000498564 |
| 0.367624915 | 0.002076699 | 0.004123943 |
| 0.243391143 | 0.030221236 | 0.027042562 |
| 0.254124768 | 0.015491248 | 0           |
| 0.330515891 | 0.017435003 | 0           |

|             |             |             |
|-------------|-------------|-------------|
| 0.389840317 | 0.016901518 | 0           |
| 0.148916187 | 0           | 0.010448989 |
| 0.172364866 | 0           | 0.030401317 |
| 0.417869756 | 0.041862049 | 0           |
| 0.159029665 | 0           | 0           |
| 0.177158542 | 0           | 0.011304846 |
| 0.268581285 | 0.005489192 | 0.045165231 |
| 0.086105737 | 0           | 0.013094335 |
| 0.170004514 | 0.004633501 | 0.045138359 |
| 0.448235759 | 0.020587402 | 0           |
| 0.139034032 | 0           | 2.82E-05    |
| 0.203053793 | 0           | 0.023142543 |
| 0.148141396 | 0           | 0.052285359 |
| 0.140794095 | 0           | 0.028264963 |
| 0.253238529 | 0           | 0.055610586 |
| 0.314072874 | 0.028360347 | 0           |
| 0.016855736 | 0           | 0.005663536 |
| 0.160261023 | 0           | 0.039546688 |
| 0.367721751 | 0.006939521 | 0           |
| 0.212750653 | 0           | 0           |
| 0.126527082 | 0.006418853 | 0.006669898 |
| 0.150767825 | 0           | 0.023411469 |
| 0.198298573 | 0           | 0.020389897 |
| 0.280742462 | 0.003952005 | 0.103401282 |
| 0.044278255 | 0           | 0.097094712 |
| 0.160380242 | 0           | 0.001366128 |
| 0.261329541 | 0           | 0.049606869 |
| 0.117232788 | 0           | 0           |
| 0.212160486 | 0.041622899 | 0           |
| 0.306246766 | 0.029262581 | 0           |
| 0.182354339 | 0           | 0.033257052 |
| 0.133301117 | 0           | 0.024019011 |
| 0.48094828  | 0.014969064 | 0           |
| 0.156450197 | 0           | 0           |
| 0.310709096 | 0.01277584  | 0           |
| 0.249365957 | 0.011947587 | 0.017141856 |
| 0.147210616 | 0           | 0.00274726  |
| 0.127900901 | 0           | 0.006141595 |
| 0.150401242 | 0           | 0.060010882 |
| 0.216805691 | 0.013472862 | 0.107213613 |



| T cells regulatory (Tregs) | T cells gamma delta | NK cells resting | NK cells activated | Monocytes   |
|----------------------------|---------------------|------------------|--------------------|-------------|
| 0                          | 0                   | 0.05102397       | 0                  | 0.055028805 |
| 0.03249374                 | 0                   | 0                | 0.029527213        | 0.052850893 |
| 0                          | 0                   | 0.049296379      | 0                  | 0.034398607 |
| 0                          | 0                   | 0.029019117      | 0                  | 0           |
| 0.028064992                | 0                   | 0.052381661      | 0.062110606        | 0.047798487 |
| 0.006398515                | 0                   | 0.02956345       | 0                  | 0.011883108 |
| 0.036976933                | 0                   | 0.029660903      | 0                  | 0.022423527 |
| 0                          | 0                   | 0.033953494      | 0                  | 0.055285216 |
| 0.009639832                | 0                   | 0.028973247      | 0.003983467        | 0           |
| 0.031371023                | 0                   | 0.030747137      | 0                  | 0.007100376 |
| 0.040987335                | 0                   | 0.022396872      | 0.00343907         | 0.024373653 |
| 0.0009058                  | 0                   | 0.062117616      | 0                  | 0.019572522 |
| 0.058090948                | 0                   | 0.031005989      | 0.017421505        | 0.015028489 |
| 0.000750211                | 0                   | 0.039445648      | 0                  | 0.034230831 |
| 0.062445182                | 0                   | 0.040418213      | 0.018513356        | 0           |
| 0.030360897                | 0                   | 0.032100477      | 0                  | 0.004400828 |
| 0.038401407                | 0                   | 0.017091967      | 0.01319496         | 0.016004649 |
| 0.029007325                | 0                   | 0                | 0.026088625        | 0.018668075 |
| 0.073864845                | 0                   | 0.007315264      | 0.05363936         | 0.076183843 |
| 0.060305903                | 0                   | 0.047810337      | 0                  | 0           |
| 0.075082816                | 0                   | 0.031936146      | 0                  | 0.007658824 |
| 0.027571131                | 0                   | 0.037302249      | 0                  | 0.07297701  |
| 0.025326149                | 0                   | 0.001540812      | 0.009507498        | 0.00068772  |
| 0.026994018                | 0                   | 0.020443817      | 0                  | 0           |
| 0                          | 0                   | 0.058102672      | 0                  | 0.026521429 |
| 0.02445828                 | 0                   | 0.002658123      | 0.019375253        | 0           |
| 0.013103533                | 0                   | 0.024860282      | 0                  | 0.014946674 |
| 0                          | 0                   | 0.035789344      | 0                  | 0.00887387  |
| 0.038227052                | 0                   | 0.014536332      | 0.023565802        | 0.018310267 |
| 0.039254301                | 0                   | 0.032303449      | 0                  | 0           |
| 0.036891988                | 0                   | 0.042716668      | 0                  | 0.002197287 |
| 0.060161922                | 0                   | 0.061151119      | 0.013795939        | 0.026072143 |
| 0.056693395                | 0                   | 0.046540768      | 0                  | 0.013310994 |
| 0                          | 0                   | 0.038193105      | 0                  | 0.008481182 |
| 0                          | 0                   | 0.002841726      | 0.018288688        | 0.03456331  |
| 0                          | 0                   | 0.054883267      | 0                  | 0.027017025 |
| 0.01208664                 | 0                   | 0.042035302      | 0                  | 0.009278284 |
| 0.046843215                | 0                   | 0.111386228      | 0                  | 0           |
| 0.000818267                | 0                   | 0                | 0                  | 0.038463976 |
| 0                          | 0                   | 0.040246509      | 0                  | 0.021211923 |
| 0.082814721                | 0                   | 0.037380484      | 0                  | 0.003605226 |
| 0.077084648                | 0                   | 0                | 0.013251205        | 0.033798481 |
| 0.003326546                | 0                   | 0.010726585      | 0.000807709        | 0.007280781 |
| 0                          | 0                   | 0.081135747      | 0.033214173        | 0.024447263 |
| 0.075188299                | 0                   | 0.044263083      | 0                  | 0.022469513 |
| 0                          | 0                   | 0.053516552      | 0                  | 0.027517792 |
| 0                          | 0                   | 0.017581114      | 0                  | 0.046947246 |
| 0                          | 0                   | 0.042659164      | 0                  | 0.041843421 |
| 0                          | 0                   | 0.05106083       | 0                  | 0.039786037 |
| 0                          | 0                   | 0.078175814      | 0                  | 0.019391322 |
| 0.043983283                | 0                   | 0                | 0.047693258        | 0.015447404 |
| 0.069695828                | 0                   | 0.065414954      | 0                  | 0.028673361 |
| 0                          | 0                   | 0.072975486      | 0                  | 0.019398539 |
| 0.002176536                | 0                   | 0                | 0.02200058         | 0.040432136 |
| 0.022302589                | 0                   | 0.050628207      | 0                  | 0           |
| 0.026105562                | 0                   | 0.036193383      | 0                  | 0.013354942 |
| 0.011785816                | 0                   | 0.045312222      | 0                  | 0.01977088  |

|             |   |             |             |             |
|-------------|---|-------------|-------------|-------------|
| 0.00859124  | 0 | 0.040928414 | 0           | 0.000706503 |
| 0           | 0 | 0.054385762 | 0           | 0.007290558 |
| 0.039025121 | 0 | 0.03979886  | 6.96E-05    | 0.020617411 |
| 0.04609127  | 0 | 0.203739796 | 0           | 0.050663476 |
| 0.10241367  | 0 | 0.104464934 | 0           | 0.055368796 |
| 0           | 0 | 0.035512845 | 0.003515248 | 0.034239363 |
| 0.056949091 | 0 | 0.055085331 | 0           | 0.038066101 |
| 0           | 0 | 0.079698344 | 0.00489259  | 0.054892072 |
| 0.031478193 | 0 | 0.023644531 | 0.005013872 | 0           |
| 0.034286538 | 0 | 0           | 0.023862111 | 0           |
| 0           | 0 | 0.035795796 | 0           | 0.022719522 |
| 0.044266473 | 0 | 0.029775064 | 0           | 0           |
| 0.049245788 | 0 | 0.0120006   | 0.002471581 | 0.011542119 |
| 0           | 0 | 0.039434891 | 0           | 0.03753512  |
| 0.053809989 | 0 | 0           | 0.019144297 | 0           |
| 0.058101439 | 0 | 0.006420189 | 0.006651708 | 0           |
| 0.010412548 | 0 | 0.030336812 | 0           | 0.037448389 |
| 0           | 0 | 0.020733717 | 0           | 0.001105782 |
| 0.006014515 | 0 | 0.019106822 | 0.016309393 | 0.032653897 |
| 0.021846854 | 0 | 0.061943324 | 0           | 0.092135895 |
| 0.005813463 | 0 | 0           | 0.001707248 | 0.068485715 |
| 0.019033453 | 0 | 0.045925246 | 0.003976418 | 0.023203188 |
| 0.017926366 | 0 | 0.021014294 | 0.005383959 | 0.011771169 |
| 0.104183866 | 0 | 0           | 0.034544311 | 0.045056331 |
| 0.025728663 | 0 | 0.045857628 | 0           | 0.018071396 |
| 0.033482812 | 0 | 0.038398391 | 0           | 0.016375395 |
| 0           | 0 | 0.018905327 | 0.00173996  | 0.044129679 |
| 0           | 0 | 0.026902046 | 0           | 0.015690359 |
| 0.053940797 | 0 | 0.063609466 | 0           | 0.030097553 |
| 0.010456476 | 0 | 0.035918801 | 0           | 0.041614962 |
| 0.001288658 | 0 | 0.030368452 | 0.016800843 | 0.043550892 |
| 0.018229098 | 0 | 0.004008376 | 0           | 0           |
| 0.016552483 | 0 | 0           | 0.010714902 | 0           |
| 0.003556474 | 0 | 0.069593633 | 0           | 0           |
| 0.076849909 | 0 | 0.073168027 | 0           | 0.024985343 |
| 0.084733542 | 0 | 0.000208693 | 0.024708568 | 0.029091642 |
| 0.053436816 | 0 | 0.090067441 | 0           | 0           |
| 0.004119089 | 0 | 0.024908872 | 0           | 0.118608849 |
| 0           | 0 | 0.035921251 | 0           | 0.02048698  |
| 0.030006475 | 0 | 0.048781617 | 0           | 0.014307517 |
| 0.0281945   | 0 | 0.068147223 | 0           | 0.038718536 |
| 0.056088556 | 0 | 0.019402298 | 0           | 0           |
| 0.104376202 | 0 | 0.032767088 | 0.017543029 | 0.033570356 |
| 0.081518782 | 0 | 0.031975407 | 0.009155238 | 0.024575607 |
| 0.049383284 | 0 | 0.067509678 | 0.009304099 | 0.013939267 |
| 0.024644894 | 0 | 0.057799499 | 0.00128081  | 0.040719937 |
| 0.031791945 | 0 | 0.01499165  | 0.007276913 | 0.001979277 |
| 0.017278199 | 0 | 0           | 0.019198203 | 0           |
| 0.025309228 | 0 | 0.017366229 | 0.004154188 | 0.006825359 |
| 0.026264839 | 0 | 0.06536625  | 0           | 0           |
| 0.055513898 | 0 | 0.098041359 | 0           | 0           |
| 0.013180599 | 0 | 0.055213855 | 0.022662862 | 0.023942179 |
| 0.003027093 | 0 | 0.018915606 | 0           | 0.0926971   |
| 0           | 0 | 0.046350464 | 0           | 0.031825088 |
| 0           | 0 | 0.020492701 | 0           | 0.01011984  |
| 0           | 0 | 0.043257824 | 0           | 0.05156975  |
| 0           | 0 | 0.040729397 | 0           | 0.027477096 |
| 0.015542795 | 0 | 0.019039595 | 0           | 0.012197423 |

|             |             |             |             |             |
|-------------|-------------|-------------|-------------|-------------|
| 0           | 0           | 0.03265007  | 0           | 0.025542604 |
| 0.066556877 | 0           | 0.02496047  | 0           | 0.029986444 |
| 0           | 0           | 0.045521192 | 0           | 0.024291605 |
| 0           | 0           | 0.016841463 | 0           | 0.012603963 |
| 0.069689526 | 0           | 0.003802193 | 0           | 0           |
| 0.007797834 | 0           | 0.025792775 | 0           | 0           |
| 0.072378356 | 0           | 0.013952521 | 0           | 0.022486094 |
| 0           | 0           | 0.010182811 | 0.003029818 | 0.050698524 |
| 0.000404726 | 0           | 0.004515546 | 0.018029022 | 0.024433037 |
| 0.001760012 | 0           | 0.014123691 | 0.017136611 | 0.035647395 |
| 0.032029016 | 0           | 0.009519964 | 0.02665924  | 0           |
| 0.052437753 | 0           | 0.059403871 | 0           | 0.017612888 |
| 0.052258635 | 0           | 0.031079658 | 0           | 0.015985306 |
| 0.008011252 | 0           | 0.065303123 | 0           | 0.100709618 |
| 0.034984415 | 0           | 0           | 0.018878274 | 0.013689123 |
| 0.026995141 | 0           | 0           | 0.020361114 | 0.009496243 |
| 0.001958355 | 0           | 0.06861046  | 0           | 0.007418382 |
| 0.033080753 | 0           | 0           | 0.006789064 | 0           |
| 0.017654801 | 0           | 0.015055104 | 0           | 0           |
| 0.044258739 | 0           | 0.052302798 | 0.005703572 | 0.027623785 |
| 0.031594725 | 0           | 0.027041386 | 0           | 0           |
| 0.033066869 | 0           | 0.020058595 | 0           | 0.021531601 |
| 0.025190722 | 0           | 0.023437454 | 0           | 0           |
| 0.001096895 | 0           | 0.029928677 | 0.010638013 | 0.020296629 |
| 0.018891059 | 0           | 0.034874147 | 0           | 0           |
| 0.023731109 | 0           | 0.016001174 | 0           | 0           |
| 0.013455929 | 0           | 0.010673945 | 0           | 0.015307425 |
| 0.000864161 | 0           | 0.058859518 | 0           | 0.026056674 |
| 0           | 0           | 0.04557462  | 0           | 0.016930818 |
| 0.039919684 | 0           | 0.072387448 | 0           | 0.040610066 |
| 0.077463157 | 0           | 0.123340136 | 0           | 0           |
| 0.051335986 | 0           | 0.043145837 | 0           | 0           |
| 0.014172719 | 0           | 0.05969044  | 0.018397998 | 0           |
| 0.112692698 | 0           | 0.028082202 | 0           | 0.015911796 |
| 0.064328782 | 0           | 0.002717484 | 0.036514539 | 0.012655822 |
| 0.005534939 | 0           | 0.093820444 | 0           | 0.043743213 |
| 0           | 0           | 0.011700506 | 0.011108478 | 0.009829541 |
| 0.061274606 | 0           | 0.060706989 | 0           | 0.006082534 |
| 0.020658885 | 0           | 0.004388236 | 0.035383159 | 0.026187428 |
| 0.008463932 | 0           | 0.062044707 | 0           | 0.063450152 |
| 0.001554411 | 0           | 0.0325232   | 0           | 0.037991163 |
| 0.001962494 | 0.019982421 | 0.014985004 | 0           | 0           |
| 0.034277053 | 0           | 0.018016327 | 0           | 0.095821539 |
| 0           | 0           | 0.044400528 | 0           | 0.016671349 |
| 0           | 0           | 0.043589274 | 0           | 0           |
| 0.031248252 | 0           | 0.02495808  | 0           | 0           |
| 0           | 0           | 0.040470097 | 0.009237523 | 0.043720678 |
| 0.054241955 | 0           | 0.043412666 | 0.006227019 | 0.019223225 |
| 0.020524879 | 0           | 0           | 0.033238874 | 0.045287765 |
| 0           | 0           | 0           | 0.024580787 | 0           |
| 0.012978493 | 0           | 0.040973835 | 0           | 0.031135138 |
| 0.00238425  | 0           | 0.056382491 | 0           | 0.024501745 |
| 0.005784233 | 0           | 0.047022917 | 0           | 0           |
| 0.052390424 | 0           | 0.075873678 | 0           | 0.020568345 |
| 0           | 0           | 0.027374154 | 0           | 0.030700102 |
| 0.030039334 | 0           | 0.058874138 | 0.010480519 | 0.034971189 |
| 0.047007208 | 0           | 0.032759148 | 0           | 0.018620861 |
| 0.003886794 | 0           | 0.03696405  | 0           | 0.013120238 |

|             |   |             |             |             |
|-------------|---|-------------|-------------|-------------|
| 0.018443449 | 0 | 0.084655642 | 0.043306658 | 0.018349906 |
| 0           | 0 | 0           | 0           | 0.018679597 |
| 0.015683414 | 0 | 0.022118529 | 0           | 0.00814678  |
| 0.017047924 | 0 | 0.035084202 | 0           | 0           |
| 0.020868234 | 0 | 0.024025286 | 0           | 0           |
| 0.033231494 | 0 | 0.007315071 | 0.010284153 | 0.019321783 |
| 0.005357434 | 0 | 0.016280835 | 0.019539633 | 0.021741891 |
| 0.065420627 | 0 | 0           | 0.075822085 | 0.037273599 |
| 0.017898725 | 0 | 0.051492388 | 0           | 0.039565109 |
| 0.000908415 | 0 | 0.010301576 | 0.031057083 | 0           |
| 0.03554194  | 0 | 0.013385203 | 0.030455769 | 0.025169404 |
| 0.050986911 | 0 | 0.009820438 | 0.005654688 | 0           |
| 0.030331947 | 0 | 0.043436998 | 0           | 0.018061805 |
| 0.030921668 | 0 | 0.006954978 | 0           | 0           |
| 0.027251925 | 0 | 0           | 0.01560476  | 0           |
| 0.049174667 | 0 | 0.015534537 | 0.008033126 | 0.003663385 |
| 0.025876226 | 0 | 0.037180738 | 0           | 0.001853577 |
| 0.008991943 | 0 | 0.005204784 | 0           | 0           |
| 0.053221113 | 0 | 0.034860249 | 0           | 0.030575212 |
| 0.03647911  | 0 | 0.067033699 | 0           | 0.02670165  |
| 0.004389217 | 0 | 0.034138783 | 0.012120166 | 0.015218821 |
| 0           | 0 | 0.045969686 | 0.003525043 | 0.053978178 |
| 0.050975572 | 0 | 0           | 0.033798031 | 0           |
| 0.037469885 | 0 | 0.175894804 | 0           | 0.046063097 |
| 0.050113817 | 0 | 0.03846915  | 0           | 0.017259662 |
| 0           | 0 | 0.02396902  | 0           | 0.024536834 |
| 0           | 0 | 0.082418774 | 0           | 0.034047773 |
| 0.055907426 | 0 | 0.041648272 | 0.009087802 | 0.035185165 |
| 0           | 0 | 0.031958959 | 0           | 0.019737378 |
| 0.08970147  | 0 | 0.063851933 | 0           | 0.035657255 |
| 0.057363651 | 0 | 0.020434666 | 0           | 0           |
| 0.006108735 | 0 | 0.083731403 | 0           | 0.040403151 |
| 0.01897342  | 0 | 0.064805855 | 0           | 0.023195418 |
| 0.021358979 | 0 | 0.000675433 | 0.015864735 | 0.015990068 |
| 0.049627834 | 0 | 0.06073916  | 0           | 0.019233526 |
| 0.046910932 | 0 | 0.018306004 | 0.014557972 | 0.009095606 |
| 0.004400319 | 0 | 0.050827717 | 0           | 0.01287571  |
| 0           | 0 | 0.033105698 | 0           | 0.021322561 |
| 0.025018066 | 0 | 0.076293561 | 0           | 0.060079886 |
| 0           | 0 | 0.066754674 | 0           | 0.019245848 |
| 0.000176486 | 0 | 0.097604018 | 0           | 0.013224807 |
| 0.041299361 | 0 | 0.019322403 | 0.001351654 | 0.012731327 |
| 0.062262038 | 0 | 0.030848682 | 0.00089555  | 0.01641933  |
| 0.057478701 | 0 | 0.033118854 | 0           | 0           |
| 0           | 0 | 0.031058412 | 0           | 0.01531054  |
| 0.019521356 | 0 | 0.058298686 | 0           | 0.020636663 |
| 0.006161997 | 0 | 0.03476508  | 0.027922718 | 0           |
| 0.0402211   | 0 | 0.095609859 | 0           | 0           |
| 0.052288279 | 0 | 0.046506579 | 0           | 0.012861039 |
| 0.00827443  | 0 | 0.021366946 | 0.015753563 | 0.07739999  |
| 0.086153459 | 0 | 0.015514137 | 0.021854202 | 0.000684173 |
| 0.018197068 | 0 | 0.034045393 | 0           | 0           |
| 0.069792214 | 0 | 0.02076059  | 0.017033227 | 0.024166449 |
| 0           | 0 | 0.041934379 | 0           | 0.035255663 |
| 0.015541159 | 0 | 0.041154893 | 0.010604398 | 0.029940522 |
| 0.021599502 | 0 | 0.021121459 | 0           | 0           |
| 0.029140696 | 0 | 0.012360514 | 0.000884737 | 0           |
| 0.005069063 | 0 | 0.071280052 | 0           | 0.006038066 |

|             |             |             |             |             |
|-------------|-------------|-------------|-------------|-------------|
| 0.021502626 | 0.039928538 | 0.007371397 | 0           | 0           |
| 0           | 0           | 0.032935897 | 0           | 0.028577662 |
| 0.042469447 | 0           | 0.016269072 | 0           | 0           |
| 0.025739992 | 0           | 0.019972041 | 0           | 0           |
| 0.104246519 | 0           | 0.028125759 | 0.037597205 | 0.018500005 |
| 0           | 0           | 0.039174343 | 0           | 0.020790629 |
| 0.001449297 | 0           | 0.032600819 | 0           | 0.008632151 |
| 0.05542847  | 0           | 0.027976089 | 0.01518866  | 0.030590826 |
| 0.03559392  | 0           | 0.007646207 | 0           | 0           |
| 0.042526467 | 0           | 0.03047684  | 0           | 0           |
| 0.054588012 | 0           | 0.019508881 | 0.015865502 | 0.026591804 |
| 0.027293714 | 0           | 0.034715088 | 0           | 0           |
| 0.003735999 | 0           | 0.04221495  | 0           | 0.032865528 |
| 0.028606064 | 0           | 0.005554914 | 0.010255945 | 0           |
| 0.017283332 | 0           | 0.065760719 | 0           | 0.006011103 |
| 0.050975363 | 0           | 0.056998011 | 0.021895434 | 0.012704074 |
| 0           | 0           | 0.04226126  | 0           | 0.010678614 |
| 0.046540695 | 0           | 0.035068948 | 0           | 0           |
| 0.041289402 | 0           | 0.024189559 | 0           | 0           |
| 0.004618735 | 0           | 0.060098192 | 0           | 0.02490048  |
| 0.047813836 | 0           | 0.043022923 | 0           | 0.048933157 |
| 0.038675329 | 0           | 0.008123799 | 0.017108043 | 0.010364083 |
| 0.022530692 | 0           | 0           | 0.034385685 | 0.016782924 |
| 0.026430258 | 0           | 0           | 0.019947063 | 0           |
| 0           | 0           | 0.007972767 | 0.043177106 | 0.018865727 |
| 0.014510147 | 0           | 0.023430062 | 0.0208886   | 0.022103036 |
| 0.057558306 | 0           | 0.085632179 | 0           | 0           |
| 0           | 0           | 0.043792503 | 0           | 0.000393184 |
| 0.055689307 | 0           | 0.05863808  | 0           | 0.043482334 |
| 0.007730236 | 0           | 0.018627531 | 0           | 0           |
| 0           | 0           | 0.057475971 | 0           | 0.059586378 |
| 0.026399801 | 0           | 0.036892098 | 0           | 0           |
| 0.035838153 | 0           | 0.042299635 | 0           | 0           |
| 0.059718066 | 0           | 0.035963356 | 0           | 0           |
| 0.039257841 | 0           | 0.103056762 | 0           | 0.049769424 |
| 0.032153201 | 0           | 0.040117832 | 0.018445475 | 0.019252643 |
| 0           | 0           | 0.080531084 | 0           | 0.013187648 |
| 0.055071671 | 0           | 0.033684229 | 0           | 0.015123883 |
| 0.046074269 | 0           | 0.026626627 | 0.001759831 | 0.014697962 |
| 0.034903244 | 0           | 0.041749829 | 0           | 0.026719071 |
| 0.014903051 | 0           | 0.067817477 | 0           | 0           |
| 0           | 0           | 0.058912159 | 0           | 0.008937848 |
| 0.024019853 | 0           | 0.001938969 | 0.00494832  | 0           |
| 0.067017471 | 0           | 0.028084787 | 0           | 0           |
| 0.059464054 | 0           | 0.022972497 | 0.007966149 | 0.035766445 |
| 0.064482248 | 0           | 0.064552502 | 0           | 0.018847378 |
| 0.004900874 | 0           | 0.038796224 | 0           | 0.008363804 |
| 0.00708215  | 0           | 0.037812638 | 0.047936403 | 0.023306597 |
| 0.014640068 | 0           | 0.042668829 | 0           | 0.000396478 |
| 0.025812142 | 0           | 0.004108494 | 0.009337693 | 0           |
| 0           | 0           | 0.048335553 | 0           | 0.019248321 |
| 0.011545087 | 0           | 0.005837945 | 0.0014787   | 0.026593272 |
| 0           | 0           | 0.020364754 | 0.030580412 | 0.014855854 |
| 0.035316784 | 0           | 0           | 0.042868359 | 0.019611481 |
| 0.064623447 | 0           | 0.016924187 | 0.007263633 | 0.014209008 |
| 0.024333306 | 0           | 0.08610335  | 0           | 0.038592089 |
| 0.027344695 | 0           | 0           | 0.003113739 | 0           |
| 0.04983725  | 0           | 0.044745063 | 0           | 0.006634223 |

|             |   |             |             |             |
|-------------|---|-------------|-------------|-------------|
| 0.02802577  | 0 | 0.101038654 | 0           | 0.032567626 |
| 0.004867109 | 0 | 0.015981414 | 0.009118725 | 0.021241184 |
| 0           | 0 | 0.070453783 | 0           | 0.030843671 |
| 0.006157204 | 0 | 0.031067235 | 0           | 0.036000018 |
| 0.049534819 | 0 | 0.070377867 | 0           | 0.02047526  |
| 0.066965946 | 0 | 0.014873146 | 0           | 0.010135001 |
| 0.055515267 | 0 | 0.067282719 | 0           | 0.051146175 |
| 0.071243769 | 0 | 0.02514003  | 0.000114408 | 0.000117166 |
| 0.052146387 | 0 | 0.049463642 | 0           | 0.007788345 |
| 0.000770093 | 0 | 0.027486916 | 0           | 0.002200119 |
| 0.014992315 | 0 | 0.016818176 | 0           | 0.026027329 |
| 0.011241706 | 0 | 0.010693801 | 0.014324114 | 0.033994862 |
| 0.000159822 | 0 | 0.075727856 | 0           | 0.024822695 |
| 0.022655898 | 0 | 0.01723066  | 0           | 0           |
| 0.070607116 | 0 | 0.019110276 | 0.005292348 | 0.01528127  |
| 0.029595474 | 0 | 0.026928376 | 0.005848242 | 0           |
| 0           | 0 | 0.057156949 | 0           | 0.010711545 |
| 0.079530986 | 0 | 0.041822353 | 0.016174146 | 0           |
| 0.055045929 | 0 | 0           | 0.06517164  | 0           |
| 0           | 0 | 0.038095634 | 0.006015391 | 0.038399071 |
| 0.032446685 | 0 | 0.039528965 | 0           | 0.013265149 |
| 0           | 0 | 0.016681699 | 0           | 0.020444526 |
| 0.040989354 | 0 | 0.017034173 | 0           | 0.008999809 |
| 0.009194446 | 0 | 0.021335081 | 0           | 0.002856876 |
| 0.029850509 | 0 | 0.028909732 | 0           | 0           |
| 0.057147013 | 0 | 0.006916312 | 0           | 0           |
| 0.05035236  | 0 | 0.057244011 | 0.011697253 | 0.05342913  |
| 0.043430697 | 0 | 0.040501844 | 0           | 0           |
| 0.024123874 | 0 | 0.031628517 | 0           | 0.016829071 |
| 0.022960045 | 0 | 0.030722053 | 0           | 0           |
| 0.075133049 | 0 | 0.032645278 | 0.003323159 | 0.019209486 |
| 0.070686326 | 0 | 0.01535137  | 0.035994667 | 0.032030265 |
| 0.020469421 | 0 | 0.054997881 | 0           | 0.022674218 |
| 0.012868345 | 0 | 0.035387494 | 0           | 0.002994604 |
| 0           | 0 | 0.029446219 | 0           | 0.020522536 |
| 0.028592768 | 0 | 0.032482624 | 0           | 0           |
| 0.032752384 | 0 | 0           | 0.036973561 | 0.017728926 |
| 0           | 0 | 0.050139641 | 0           | 0.011066912 |
| 0.037397122 | 0 | 0.107852911 | 0           | 0.0338463   |
| 0.027831048 | 0 | 0.039758946 | 0           | 0.012153549 |
| 0.024155962 | 0 | 0.017228869 | 0.004605259 | 0           |
| 0.031212308 | 0 | 0.017124275 | 0           | 0.009549022 |
| 0.020376514 | 0 | 0           | 0.03022403  | 0.056583261 |
| 0.016396972 | 0 | 0           | 0           | 0.002254576 |
| 0           | 0 | 0.038236423 | 0           | 0.026235578 |
| 0.020385195 | 0 | 0.042322999 | 0           | 0           |
| 0           | 0 | 0.048990599 | 0           | 0.026124602 |
| 0.052649753 | 0 | 0.010762904 | 0           | 0           |
| 0.004407927 | 0 | 0           | 0.021827559 | 0           |
| 0.032786595 | 0 | 0.012528422 | 0           | 0           |
| 0.038122854 | 0 | 0.014166817 | 0.010938441 | 0           |
| 0.060039877 | 0 | 0           | 0.043309313 | 0.005181215 |
| 0.027315423 | 0 | 0.0268661   | 0           | 0           |
| 0.040222391 | 0 | 0.046317739 | 0.010910106 | 0           |
| 0.031575333 | 0 | 0.009904348 | 0.004182025 | 0.005410026 |
| 0.025837119 | 0 | 0.031958536 | 0.005265183 | 0           |
| 0.021461598 | 0 | 0.037386161 | 0           | 0           |
| 0.031949496 | 0 | 0.094397629 | 0           | 0.009721023 |

|             |             |             |             |             |
|-------------|-------------|-------------|-------------|-------------|
| 0.005672872 | 0           | 0.022263048 | 0           | 0.00936656  |
| 0.045434186 | 0           | 0.046335796 | 0.005269216 | 0.02330411  |
| 0.037992617 | 0           | 0.014552583 | 0           | 0.01367556  |
| 0.033729065 | 0           | 0.075154858 | 0           | 0.016659468 |
| 0.036316005 | 0           | 0.014890101 | 0.021897936 | 0.021689007 |
| 0.025820943 | 0           | 0.022449579 | 0           | 0           |
| 0.058067443 | 0           | 0           | 0.032289425 | 0.002955559 |
| 0.062654767 | 0           | 0.02153622  | 0.004987703 | 0.0104238   |
| 0.016338669 | 0           | 0.06794234  | 0           | 0           |
| 0.03315192  | 0           | 0.028941608 | 0           | 0.018201568 |
| 0.041651693 | 0           | 0.058868995 | 0           | 0.019140428 |
| 0.044742508 | 0           | 0.025721899 | 0.0018518   | 0.032470914 |
| 0.001620656 | 0           | 0.045361469 | 0           | 0.007682085 |
| 0.024408688 | 0           | 0.024323506 | 0           | 0           |
| 0.024463911 | 0           | 0.012727723 | 0           | 0           |
| 0           | 0           | 0.026313976 | 0.004970276 | 0.001165258 |
| 0.048328807 | 0           | 0.025267625 | 0.001325216 | 0           |
| 0.011930137 | 0           | 0.029305309 | 0           | 0.016542608 |
| 0.014727472 | 0           | 0           | 0.023437382 | 0.023647841 |
| 0.020376187 | 0           | 0.02025917  | 0.011240561 | 0           |
| 0.09202972  | 0           | 0.020834192 | 0.045080495 | 0.060130981 |
| 0.003865845 | 0           | 0           | 0.007997661 | 0           |
| 0.034503951 | 0.004386742 | 0           | 0.033773315 | 0.021018586 |
| 0.000727137 | 0           | 0.071540364 | 0           | 0.034786325 |
| 0.041856182 | 0           | 0.077481647 | 0           | 0           |
| 0.051668082 | 0           | 0.04033758  | 0           | 0.020637    |
| 0.040932466 | 0           | 0.018194708 | 0           | 0           |
| 0.016197117 | 0           | 0.078184199 | 0           | 0           |
| 0.009015244 | 0           | 0.053644008 | 0           | 0.012282859 |
| 0.054405976 | 0           | 0.055941619 | 0           | 0.009410924 |
| 0.011432682 | 0           | 0.099897882 | 0           | 0.023329187 |
| 0.00086794  | 0           | 0.040958403 | 0           | 0.013822008 |
| 0.009030938 | 0           | 0.015967816 | 0.015821567 | 0           |
| 0           | 0           | 0.03016802  | 0           | 0.007042493 |
| 0.011173969 | 0           | 0.016523222 | 0.025620891 | 0.021445447 |
| 0.009843626 | 0           | 0.099391002 | 0           | 0.044047223 |
| 0.069548755 | 0           | 0           | 0.033448312 | 0.030385022 |
| 0.000790752 | 0           | 0.005181124 | 0.016883609 | 0           |
| 0.008050752 | 0           | 0.034344515 | 0           | 0.014101416 |
| 0.037854076 | 0           | 0.028231669 | 0           | 0           |
| 0.056735476 | 0           | 0.031654656 | 0           | 0.011432704 |
| 0.015711799 | 0           | 0.032328135 | 0           | 0           |
| 0.021384272 | 0           | 0.028191866 | 0.01052173  | 0.011158983 |
| 0.033944701 | 0           | 0.038125303 | 0           | 0           |
| 0.045626404 | 0           | 0.048843729 | 0           | 0.004078864 |
| 0.011991059 | 0           | 0.021061401 | 0           | 0           |
| 0.045973443 | 0           | 0.120395816 | 0           | 0           |
| 0.054321887 | 0           | 0.036805204 | 0.045226418 | 0.011571185 |
| 0.084988634 | 0           | 0.010295619 | 0.000568624 | 0.010140772 |
| 0.037517945 | 0           | 0.034648653 | 0           | 0           |
| 0.049297474 | 0           | 0.047333299 | 0           | 0.006948211 |
| 0.021782778 | 0           | 0.002760869 | 0.004545991 | 0           |
| 0           | 0           | 0.010878693 | 0.001699255 | 0.020606309 |
| 0.069537213 | 0           | 0.072521261 | 0           | 0.017620371 |
| 0           | 0           | 0.060990317 | 0           | 0.034794001 |
| 0.043332631 | 0           | 0.086236464 | 0           | 0.015383786 |
| 0           | 0           | 0.032556695 | 0           | 0           |
| 0           | 0           | 0.032333807 | 0           | 0.006866132 |

|             |             |             |             |             |
|-------------|-------------|-------------|-------------|-------------|
| 0.0623324   | 0           | 0.074026585 | 0           | 0.032356838 |
| 0.031110544 | 0           | 0.021214476 | 0           | 0           |
| 0.066776274 | 0           | 0.032299905 | 0.03255477  | 0.013328863 |
| 0           | 0           | 0.048579309 | 0           | 0.01506912  |
| 0.003247916 | 0           | 0.040417273 | 0           | 0           |
| 0.012147335 | 0           | 0.0185209   | 0.005742011 | 0           |
| 0.058081755 | 0           | 0.024060943 | 0           | 0.011620614 |
| 0.03331837  | 0           | 0.021363449 | 0           | 0.063665461 |
| 0.048475863 | 0           | 0.028936282 | 0           | 0           |
| 0.010357318 | 0           | 0.080044672 | 0           | 0.03209817  |
| 0.019954117 | 0           | 0.015512904 | 0.013267018 | 0           |
| 0.127470478 | 0           | 0.019945082 | 0.017627918 | 0.022897861 |
| 0.044573325 | 0           | 0.010958688 | 0           | 0.006782245 |
| 0.029747248 | 0           | 0.025887465 | 0.028843425 | 0.01360179  |
| 0.097368169 | 0           | 0.00064821  | 0.019573723 | 0.015915783 |
| 0.069785656 | 0           | 0.016698851 | 0.00933355  | 0.016559514 |
| 0.026163496 | 0.028051716 | 0.01024652  | 0           | 0           |
| 0.067940403 | 0           | 0.023811779 | 0           | 0           |
| 0.055392775 | 0           | 0.036865537 | 0           | 0.023428019 |
| 0.062683618 | 0           | 0.016286541 | 0.037831188 | 0.007788954 |
| 0           | 0           | 0.020477124 | 0           | 0.067709935 |
| 0.046182658 | 0           | 0.046900001 | 0           | 0           |
| 0.063947726 | 0           | 0.021675393 | 0.000937413 | 0.027291673 |
| 0.01163697  | 0           | 0.021460565 | 0.037243398 | 0.011103195 |
| 0.034172136 | 0           | 0           | 0.016170065 | 0           |
| 0.001336098 | 0           | 0.022396196 | 0.003417758 | 0           |
| 0           | 0           | 0.075784293 | 0           | 0           |
| 0.014271168 | 0           | 0.025452973 | 0           | 0           |
| 0           | 0           | 0.062600404 | 0           | 0.015092573 |
| 0.010079665 | 0           | 0.080465383 | 0           | 0.026574286 |
| 0.025968396 | 0           | 0.040848567 | 0           | 0           |
| 0.023625645 | 0           | 0.007195005 | 0.004182623 | 0           |
| 0.004446823 | 0           | 0.08361894  | 0           | 0.036701662 |
| 0.001322562 | 0           | 0.021316802 | 0.006181012 | 0.121639374 |
| 0.058221564 | 0           | 0.033373637 | 0           | 0.01849142  |
| 0.020583    | 0           | 0.044754435 | 0           | 0.050346792 |
| 0.063967427 | 0           | 0           | 0.025897367 | 0.028396418 |
| 0.05041551  | 0           | 0.007627614 | 0           | 0.006201652 |
| 0.017316713 | 0           | 0.051212918 | 0.002141489 | 0.008226096 |
| 0.035840489 | 0           | 0.038166316 | 0.005172802 | 0.015145373 |



| Macrophages M0 | Macrophages M1 | Macrophages M2 | Dendritic cells resting |
|----------------|----------------|----------------|-------------------------|
| 0.026282906    | 0.03988693     | 0.106343537    | 0.001186772             |
| 0              | 0.04632231     | 0.297627792    | 0                       |
| 0.067358288    | 0.058996609    | 0.222029016    | 0                       |
| 0.288231333    | 0.017396105    | 0.321635178    | 0                       |
| 0.126599845    | 0.099236214    | 0.066206454    | 0.00094632              |
| 0.01384261     | 0.043728355    | 0.303021207    | 0                       |
| 0.156222736    | 0.062060013    | 0.13346125     | 0                       |
| 0.283619955    | 0.071263931    | 0.076210898    | 0                       |
| 0.340206936    | 0.040979317    | 0.260528704    | 0                       |
| 0.171770741    | 0.061140456    | 0.319310006    | 0                       |
| 0.108562149    | 0.118125579    | 0.189401408    | 0                       |
| 0.318205223    | 0.009407225    | 0.222730682    | 0                       |
| 0.066986211    | 0.144169853    | 0.166756667    | 0                       |
| 0.020321848    | 0.062802231    | 0.153582141    | 0.00807116              |
| 0.496836982    | 0              | 0.012425787    | 0                       |
| 0.18037635     | 0.040052344    | 0.194716091    | 0                       |
| 0              | 0.116611319    | 0.164774082    | 0.007361358             |
| 0.273409824    | 0.046453645    | 0.081748245    | 0                       |
| 0.117134589    | 0.124780274    | 0.060277607    | 0.007252525             |
| 0.265781555    | 0.082688805    | 0.145381993    | 0                       |
| 0.152980659    | 0.029690429    | 0.219387477    | 0                       |
| 0              | 0.072233608    | 0.2668882      | 0.043431057             |
| 0.206314751    | 0.05123291     | 0.275594315    | 0.028963772             |
| 0.270790085    | 0.072904577    | 0.202847492    | 0                       |
| 0.132174126    | 0.080359231    | 0.121461487    | 0                       |
| 0.463870115    | 0.05844469     | 0.128010415    | 0                       |
| 0.147665931    | 0.066661231    | 0.221296298    | 0.005639146             |
| 0.235929849    | 0.055999676    | 0.236451013    | 0                       |
| 0.174322591    | 0.043990723    | 0.130476376    | 0                       |
| 0.29328018     | 0.094904169    | 0.117527974    | 0                       |
| 0.237410425    | 0.04608108     | 0.266659296    | 0                       |
| 0.432375423    | 0              | 0.056034104    | 0                       |
| 0.046516642    | 0.071404331    | 0.209303422    | 0                       |
| 0.151207717    | 0.059587404    | 0.163404734    | 0                       |
| 0.053957502    | 0.078576085    | 0.217121302    | 0                       |
| 0.004868328    | 0.067262076    | 0.12395827     | 0.041982511             |
| 0.341422949    | 0.018480257    | 0.194335906    | 0                       |
| 0.513636265    | 0              | 0.031832981    | 0                       |
| 0.209717142    | 0.133254934    | 0.074972524    | 0.021687624             |
| 0.056752164    | 0.047345737    | 0.305224251    | 0                       |
| 0.217963585    | 0.058124363    | 0.117216765    | 0                       |
| 0.051448091    | 0.078727226    | 0.155690662    | 0.0138144               |
| 0.074596922    | 0.125610797    | 0.188095643    | 0                       |
| 0.057583478    | 0.077988459    | 0.128734764    | 0.028648484             |
| 0.115000865    | 0.073461961    | 0.228947779    | 0                       |
| 0.022585794    | 0.124000544    | 0.105472299    | 0                       |
| 0.0711107223   | 0.09945267     | 0.142256254    | 0.00370235              |
| 0.158602818    | 0.041317662    | 0.219322406    | 0.013475134             |
| 0.031156563    | 0.103195592    | 0.131471058    | 0.019588406             |
| 0.127729082    | 0.078606914    | 0.170747796    | 0                       |
| 0.175722703    | 0              | 0.248684489    | 0                       |
| 0.072342861    | 0.075835485    | 0.226374944    | 0.010039839             |
| 0.022808954    | 0.073035596    | 0.129521982    | 0                       |
| 0.042836987    | 0.135902088    | 0.003526018    | 0.007847914             |
| 0.312040893    | 0.035665338    | 0.193612685    | 0                       |
| 0              | 0.101678315    | 0.341199806    | 0                       |
| 0.078220322    | 0.157804497    | 0.158810015    | 0.003702172             |

|             |             |             |             |
|-------------|-------------|-------------|-------------|
| 0.152113354 | 0.063689304 | 0.25572197  | 0.001085037 |
| 0.066710565 | 0.11977358  | 0.185252323 | 0           |
| 0.079992996 | 0.105683967 | 0.191664325 | 0           |
| 0.076222708 | 0           | 0.194326783 | 0.009493116 |
| 0.107469083 | 0.09769781  | 0.012223466 | 0.008928034 |
| 0.070312383 | 0.133746199 | 0.217416024 | 0.017060599 |
| 0.21178942  | 0.075718679 | 0.100018743 | 0.003910859 |
| 0.10448514  | 0.005710182 | 0.035740191 | 0           |
| 0.265926428 | 0.058144734 | 0.2384569   | 0           |
| 0.44734203  | 0.04671238  | 0.196168588 | 0           |
| 0.147004697 | 0.007341091 | 0.249196381 | 0.065315579 |
| 0.305296921 | 0.064470346 | 0.115526337 | 0           |
| 0.199484084 | 0.054259043 | 0.187960075 | 0           |
| 0.014761089 | 0.067872127 | 0.531836332 | 0           |
| 0.229135862 | 0.094824128 | 0.106995781 | 0           |
| 0.360380597 | 0.033114464 | 0.276030501 | 0           |
| 0.14095582  | 0.121774987 | 0.113891137 | 0           |
| 0.32979457  | 0.026513929 | 0.11855514  | 0           |
| 0.097906798 | 0.130215667 | 0.081871945 | 0.01167981  |
| 0.015815529 | 0.070211877 | 0.091013645 | 0           |
| 0           | 0.045185626 | 0.316520599 | 0           |
| 0.080989833 | 0.098610594 | 0.121094306 | 0           |
| 0.296330487 | 0.063700075 | 0.245438147 | 0           |
| 0.041192453 | 0.072174174 | 0.101301732 | 0.001910824 |
| 0.265474662 | 0.062523324 | 0.061564601 | 0           |
| 0           | 0.11881332  | 0.149793146 | 0           |
| 0           | 0.037844417 | 0.188428329 | 0.05131213  |
| 0           | 0.035688965 | 0.15982975  | 0.026099782 |
| 0.128634259 | 0.046051361 | 0.141019348 | 0.056424288 |
| 0.187324496 | 0.016488426 | 0.153670537 | 0.024781395 |
| 0.174818373 | 0.081718009 | 0.180199478 | 0           |
| 0.389359338 | 0.031543852 | 0.22194826  | 0           |
| 0.174805649 | 0.036678577 | 0.437214857 | 0           |
| 0.280590897 | 0.067887309 | 0.129385136 | 0           |
| 0.066989585 | 0.107278305 | 0.081784411 | 0           |
| 0.078838899 | 0.087649327 | 0.307092757 | 0.02425687  |
| 0.35758285  | 0           | 0.162675479 | 0.001425991 |
| 0.13520539  | 0.036828248 | 0.336420583 | 0           |
| 0           | 0.055357614 | 0.136596176 | 0.007583006 |
| 0.091777186 | 0.112915077 | 0.160682808 | 0.008101328 |
| 0.062468974 | 0.100709531 | 0.090839721 | 0.000174547 |
| 0.370786861 | 0.058710184 | 0.205061739 | 0           |
| 0.188516942 | 0.011487082 | 0.221356943 | 0.047593776 |
| 0.160553323 | 0.049241533 | 0.211480665 | 0           |
| 0.06102485  | 0.141619122 | 0.094875783 | 0           |
| 0.092933467 | 0.083201217 | 0.136417431 | 0           |
| 0.211981419 | 0.057262079 | 0.325059564 | 0.013887184 |
| 0.359411573 | 0.012940121 | 0.300062415 | 0           |
| 0.131121738 | 0.023283127 | 0.31503458  | 0.044423927 |
| 0.444554141 | 0.015176759 | 0.168517754 | 0           |
| 0.349434591 | 0           | 0.109565816 | 0           |
| 0.115861509 | 0.1073502   | 0.076807929 | 0           |
| 0           | 0.078868019 | 0.239968446 | 0           |
| 0.088004309 | 0.044671572 | 0.037400729 | 0           |
| 0           | 0.072758973 | 0.333505149 | 0           |
| 0.417517407 | 0.020932198 | 0.022745813 | 0           |
| 0           | 0.066687487 | 0.143986365 | 0           |
| 0.075076532 | 0.082367042 | 0.180984924 | 0.004176787 |

|             |             |             |             |
|-------------|-------------|-------------|-------------|
| 0.018585228 | 0.058942477 | 0.279949096 | 0.04090579  |
| 0           | 0.062235785 | 0.212792504 | 0           |
| 0           | 0.033674808 | 0.170663488 | 0           |
| 0.077007126 | 0.047072502 | 0.192010074 | 0.004054361 |
| 0.437571226 | 0.039356508 | 0.011494169 | 0           |
| 0.249075778 | 0.069302316 | 0.177564651 | 0           |
| 0.200329914 | 0.096245137 | 0.004395622 | 0           |
| 0.029080297 | 0.031351571 | 0.250906402 | 0.009015116 |
| 0.034647367 | 0.132296923 | 0.273831848 | 0.003172213 |
| 0.122609268 | 0.076706695 | 0.109334659 | 0.001272715 |
| 0.240101932 | 0.031850997 | 0.259706661 | 0           |
| 0           | 0.09897551  | 0.177216462 | 0.002407584 |
| 0.035690752 | 0.088625497 | 0.148941377 | 0           |
| 0           | 0.063130315 | 0.260549378 | 0.017756824 |
| 0.270197915 | 0.005814922 | 0.267042706 | 0.032332962 |
| 0.306185194 | 0.110326914 | 0.059178568 | 0           |
| 0.151120964 | 0.040126112 | 0.128977665 | 0           |
| 0.391520338 | 0.060554307 | 0.139618201 | 0           |
| 0.132500501 | 0.107303574 | 0.23795518  | 0           |
| 0.378199302 | 0           | 0.150281216 | 0           |
| 0.450801716 | 0.064385815 | 0.139940896 | 0           |
| 0.442034982 | 0.027293685 | 0.146313888 | 0           |
| 0.389708986 | 0.020585092 | 0.111681066 | 0           |
| 0.127497396 | 0.114099306 | 0.144055593 | 0           |
| 0.423677376 | 0.024433507 | 0.264936735 | 0           |
| 0.298916083 | 0.02376023  | 0.144203945 | 0           |
| 0.049484892 | 0.086941903 | 0.158575358 | 0           |
| 0.066620873 | 0.085602855 | 0.150483543 | 0           |
| 0.073963595 | 0.102586855 | 0.120391723 | 0.007751914 |
| 0.187524203 | 0.050150493 | 0.048208682 | 0           |
| 0.555694643 | 0.008585214 | 0.000478207 | 0           |
| 0.330682903 | 0.025887598 | 0.205163862 | 0           |
| 0.185898456 | 0.122057801 | 0.140430242 | 0.00164988  |
| 0.16337428  | 0.115242359 | 0.07158827  | 0           |
| 0.295404004 | 0.063245899 | 0.121483696 | 0           |
| 0.053607277 | 0.090511602 | 0.127349564 | 0.014904101 |
| 0.334868992 | 0.105678542 | 0.227229664 | 0           |
| 0.308540804 | 0.08923449  | 0.097554481 | 0           |
| 0.277330157 | 0.100369059 | 0.063998588 | 0           |
| 0.146762888 | 0.017127251 | 0.317715083 | 0           |
| 0.052720463 | 0.122736561 | 0.132736262 | 0.003624071 |
| 0.032698589 | 0.084057908 | 0.173709617 | 0           |
| 0.085035685 | 0.049553296 | 0.317735664 | 0.094025633 |
| 0.085006307 | 0.149854449 | 0.078553085 | 0           |
| 0.395138538 | 0.073994297 | 0.134314773 | 0           |
| 0.373493569 | 0.043131346 | 0.220716741 | 0           |
| 0.099844771 | 0.082215365 | 0.095476369 | 0.009174787 |
| 0.17048835  | 0.152977262 | 0.040100875 | 0.007261829 |
| 0.24021725  | 0.051186997 | 0.156672524 | 0.03258407  |
| 0.003216833 | 0.03279386  | 0.046580839 | 0           |
| 0.086140049 | 0.055011914 | 0.275685509 | 0           |
| 0           | 0.101309296 | 0.10916392  | 0.004742882 |
| 0.186750784 | 0.038781368 | 0.224121005 | 0           |
| 0.083139579 | 0.079483976 | 0.178432406 | 0.002266567 |
| 0           | 0.055442192 | 0.171775254 | 0.023297767 |
| 0.09692118  | 0.072184981 | 0.053268397 | 0           |
| 0.045568467 | 0.048954853 | 0.17003161  | 0           |
| 0.049847377 | 0.040492186 | 0.100002137 | 0.011869301 |

|             |             |             |             |
|-------------|-------------|-------------|-------------|
| 0.046070581 | 0.101287698 | 0.119378672 | 0           |
| 0.023877794 | 0.044633944 | 0.109842294 | 0           |
| 0.034393323 | 0.097649641 | 0.158500881 | 0.006144981 |
| 0.333462425 | 0.033889931 | 0.322389731 | 0           |
| 0.37198189  | 0.074895472 | 0.173043659 | 0           |
| 0.030805201 | 0.120150655 | 0.117918667 | 0.004911703 |
| 0.012508307 | 0.113303245 | 0.175244007 | 0           |
| 0.26893967  | 0.016535641 | 0.168719572 | 0           |
| 0           | 0.071500654 | 0.122521382 | 0.004367008 |
| 0.21342404  | 0.095120477 | 0.15374478  | 0.016770508 |
| 0.204566679 | 0.103313556 | 0.096818345 | 0           |
| 0.409890517 | 0.016012137 | 0.16094646  | 0           |
| 0.142428174 | 0.078991035 | 0.090626659 | 0           |
| 0.553419982 | 0.023342458 | 0.171227017 | 0           |
| 0.194001631 | 0.057666314 | 0.203366276 | 0           |
| 0.409889839 | 0.039309214 | 0.095404152 | 0           |
| 0.089193845 | 0.078897451 | 0.222651641 | 0           |
| 0.620741986 | 0.024466513 | 0.142296036 | 0           |
| 0.123097461 | 0.065113728 | 0.186813171 | 0.002368474 |
| 0.021193378 | 0.067973707 | 0.141799253 | 0.009586489 |
| 0.042723653 | 0.110791144 | 0.050529137 | 0           |
| 0.034267129 | 0.055233994 | 0.099378952 | 0.006311956 |
| 0.214959342 | 0.042797429 | 0.1973913   | 0           |
| 0.029233372 | 0.109449795 | 0.125802405 | 0.002038554 |
| 0.200700544 | 0.09100819  | 0.086808175 | 0           |
| 0           | 0.083437152 | 0.093628716 | 0           |
| 0.197923644 | 0.067114583 | 0.108701868 | 0           |
| 0.1666339   | 0.137671626 | 0.053085985 | 0           |
| 0.240598194 | 0.033188669 | 0.344461901 | 0           |
| 0.169599215 | 0.074647289 | 0.061575687 | 0           |
| 0.257336128 | 0.074104784 | 0.243963359 | 0           |
| 0.006895659 | 0.100198515 | 0.092331255 | 0           |
| 0.146524185 | 0.149810732 | 0.022625604 | 0           |
| 0.072549967 | 0.053137726 | 0.293088707 | 0           |
| 0.016996034 | 0.119697676 | 0.147272821 | 0.004384926 |
| 0.150254496 | 0.073668693 | 0.161103056 | 0.022598655 |
| 0.12794815  | 0.0772925   | 0.179171945 | 0           |
| 0.008402579 | 0.075067592 | 0.115282723 | 0.019524811 |
| 0.063462423 | 0.070743741 | 0.107121808 | 0.004265785 |
| 0.229995998 | 0.065173798 | 0.101651178 | 0           |
| 0.09750088  | 0.18617162  | 0.101253599 | 0           |
| 0.37140885  | 0.006672143 | 0.233176046 | 0.004178958 |
| 0.036753089 | 0.060834804 | 0.20447457  | 0           |
| 0.183643417 | 0.067001906 | 0.148205075 | 0           |
| 0           | 0.074058995 | 0.119953328 | 0.01987184  |
| 0.260850404 | 0.096176185 | 0.181306978 | 0           |
| 0.29899152  | 0.077178901 | 0.075013787 | 0           |
| 0.675698227 | 0           | 0.021373849 | 0           |
| 0.03025652  | 0.025163589 | 0.183797934 | 0           |
| 0.066291858 | 0.150697989 | 0.070076406 | 0.018595823 |
| 0.310311105 | 0.031148133 | 0.080068214 | 0           |
| 0.200526135 | 0.036463493 | 0.240895194 | 0           |
| 0.065474444 | 0.103953522 | 0.096779021 | 0.015744242 |
| 0.089412481 | 0.044144065 | 0.133381899 | 0           |
| 0.112935571 | 0.086178306 | 0.116899984 | 0           |
| 0.308171791 | 0.051672531 | 0.274430568 | 0.00562057  |
| 0.325851223 | 0.085371633 | 0.217361531 | 0           |
| 0.165638468 | 0.156622993 | 0.034737978 | 0           |

|             |             |             |             |
|-------------|-------------|-------------|-------------|
| 0.409213549 | 0           | 0.12015702  | 0           |
| 0.028130452 | 0.052721683 | 0.192552908 | 0.004952215 |
| 0.310842873 | 0.069853275 | 0.213721473 | 0           |
| 0.137891353 | 0.099962678 | 0.316962765 | 0           |
| 0.112681295 | 0.097263328 | 0.105855268 | 0           |
| 0.129125147 | 0.065860613 | 0.191440472 | 0.030320942 |
| 0.246454955 | 0.064297299 | 0.061912104 | 0.01191764  |
| 0.212895176 | 0.088711512 | 0.120821359 | 0           |
| 0.399161303 | 0.038609359 | 0.357931046 | 0           |
| 0.272721093 | 0.109084263 | 0.208166489 | 0           |
| 0.04024101  | 0.21829155  | 0.186217665 | 0           |
| 0.319514189 | 0.049951477 | 0.238876984 | 0           |
| 0.227611531 | 0.108994076 | 0.097750708 | 0           |
| 0.339571199 | 0.061926349 | 0.188647789 | 0           |
| 0.163358672 | 0.077105912 | 0.035361672 | 0           |
| 0.004981602 | 0.113412081 | 0.119561719 | 0           |
| 0.276734442 | 0.065374638 | 0.084728397 | 0           |
| 0.222084757 | 0.047689911 | 0.141782024 | 0           |
| 0.299928111 | 0.041577327 | 0.195980174 | 0           |
| 0.063376261 | 0.160751262 | 0.106667126 | 0.022876298 |
| 0.042411198 | 0.138187304 | 0.155327623 | 0.000843261 |
| 0.193154266 | 0.038591039 | 0.2545842   | 0.017495089 |
| 0.15722423  | 0.149275775 | 0.074337549 | 0.003013492 |
| 0.434956259 | 0.013364576 | 0.276066282 | 0           |
| 0.07621416  | 0.146839584 | 0.128415788 | 0           |
| 0.197600259 | 0.087576411 | 0.096918565 | 0.002118924 |
| 0.564764483 | 0           | 0.122165431 | 0           |
| 0.227837233 | 0.08484249  | 0.088907951 | 0           |
| 0.153566623 | 0.131246783 | 0.012046134 | 0           |
| 0.240434588 | 0.016487937 | 0.264362448 | 0           |
| 0.066175203 | 0.10237074  | 0.181850851 | 0           |
| 0.335871501 | 0.039352785 | 0.138340786 | 0           |
| 0.341911933 | 0.043365513 | 0.191333387 | 0           |
| 0.235739118 | 0.089418235 | 0.210183401 | 0           |
| 0.023943239 | 0.140523913 | 0.037724627 | 0.001063661 |
| 0.060343776 | 0.179719031 | 0.103128105 | 0           |
| 0.068087847 | 0.111060019 | 0.251640059 | 0           |
| 0.137682392 | 0.028600034 | 0.152314265 | 0           |
| 0.042909237 | 0.080356904 | 0.134015077 | 0           |
| 0.075759405 | 0.063517646 | 0.101661175 | 0           |
| 0.287408766 | 0.136522856 | 0.13328372  | 0           |
| 0.113138708 | 0.117872701 | 0.121339095 | 0.003165185 |
| 0.524680598 | 0.044018283 | 0.095022939 | 0           |
| 0.23370904  | 0.041225883 | 0.352545532 | 0           |
| 0.183650356 | 0.131292072 | 0.085484105 | 0           |
| 0           | 0.104650716 | 0.243642894 | 0.002842911 |
| 0.254008567 | 0.105612415 | 0.093430217 | 0           |
| 0.089046125 | 0.118876153 | 0.145822117 | 0.004482522 |
| 0.460058036 | 0.098282077 | 0.061462981 | 0           |
| 0.460883398 | 0.011630633 | 0.124675373 | 0           |
| 0.174801193 | 0.103333316 | 0.179928076 | 0.002020245 |
| 0.025935944 | 0.055103367 | 0.495868613 | 0           |
| 0.139235486 | 0.08645571  | 0.070610705 | 0           |
| 0.030093917 | 0.099380258 | 0.048904112 | 0.000975285 |
| 0.051138402 | 0.149409869 | 0.082105319 | 0.006132202 |
| 0.035416264 | 0.108416194 | 0.050741012 | 0.003711521 |
| 0.422296024 | 0.068962838 | 0.211429875 | 0           |
| 0.098784203 | 0.173225664 | 0.17078998  | 0           |

|             |             |             |             |
|-------------|-------------|-------------|-------------|
| 0.046569607 | 0.14841219  | 0.059334863 | 0.000820165 |
| 0.2892783   | 0.073098503 | 0.172368574 | 0           |
| 0.088736691 | 0.047696062 | 0.065251683 | 0           |
| 0.259574663 | 0.092872643 | 0.049047016 | 0.001619437 |
| 0.094860296 | 0.057319096 | 0.149686334 | 0           |
| 0.097190675 | 0.144961747 | 0.084340483 | 0.049138305 |
| 0.090228075 | 0.107608397 | 0.023833649 | 0.005623079 |
| 0.294967107 | 0.069346067 | 0.13830803  | 0           |
| 0.213274017 | 0.074201201 | 0.128945181 | 0           |
| 0.120786675 | 0.06923358  | 0.172886057 | 0.008523122 |
| 0.020376332 | 0.087522183 | 0.180132698 | 0.000413643 |
| 0.095926789 | 0.080327157 | 0.105298694 | 0.000369372 |
| 0.020556844 | 0.157412165 | 0.172861824 | 0           |
| 0.256990926 | 0.047923385 | 0.265195932 | 0.005532837 |
| 0.271297058 | 0.103276778 | 0.139656868 | 0.001786266 |
| 0.290145786 | 0.043115702 | 0.18012098  | 0           |
| 0.495583395 | 0.017769008 | 0.112177827 | 0           |
| 0.548095389 | 0           | 0.034257352 | 0           |
| 0.334163209 | 0.132013631 | 0.098500355 | 0.012848312 |
| 0.05335548  | 0.101498726 | 0.048460815 | 0.007177908 |
| 0.177202962 | 0.078792671 | 0.171288756 | 0           |
| 0.000190182 | 0.097481982 | 0.085829678 | 0           |
| 0.280938238 | 0.093822075 | 0.126432553 | 0           |
| 0.195097125 | 0.145040237 | 0.173548812 | 0           |
| 0.30108501  | 0.001404425 | 0.449091459 | 0           |
| 0.370034585 | 0.026720118 | 0.165409853 | 0           |
| 0.16021381  | 0.101929764 | 0.04497469  | 0           |
| 0.334344055 | 0.051627046 | 0.169518895 | 0           |
| 0.028519488 | 0.134315692 | 0.078208318 | 0           |
| 0.300038732 | 0.128743387 | 0.265603721 | 0           |
| 0.026540022 | 0.045392247 | 0.164977272 | 0.000305379 |
| 0.096289002 | 0.130514146 | 0.128944387 | 0.001821462 |
| 0.268697262 | 0.08679203  | 0.082881237 | 0.003215825 |
| 0.185145625 | 0.122411583 | 0.222423745 | 0           |
| 0.012808087 | 0.182495337 | 0.074587333 | 0.021347678 |
| 0.230143265 | 0.051924887 | 0.264099178 | 0           |
| 0.027458768 | 0.155071067 | 0.212977838 | 0.116752967 |
| 0.239968794 | 0.067771662 | 0.186386169 | 0.097074874 |
| 0.312725664 | 0.048222721 | 0.04127671  | 0           |
| 0.094218495 | 0.100398408 | 0.142149641 | 0           |
| 0.314762541 | 0.026954468 | 0.29880532  | 0           |
| 0.272906365 | 0.030349098 | 0.296693177 | 0.044172918 |
| 0.180773372 | 0.082774651 | 0.273323208 | 0.003065745 |
| 0.394201652 | 0.031903188 | 0.26712699  | 0           |
| 0.474759513 | 0.060618763 | 0.04170539  | 0           |
| 0.236196662 | 0.161835426 | 0.073778437 | 0           |
| 0.079947066 | 0.090380774 | 0.094463421 | 0           |
| 0.271168354 | 0.071213864 | 0.245754665 | 0           |
| 0.168264043 | 0.01142667  | 0.449273407 | 0           |
| 0.343627792 | 0.048969502 | 0.209480356 | 0           |
| 0.36275295  | 0.094572715 | 0.071203218 | 0           |
| 0.303850853 | 0.062762817 | 0.082358852 | 0           |
| 0.472218547 | 0.021361048 | 0.20741475  | 0           |
| 0.186033481 | 0.121652886 | 0.068167439 | 0           |
| 0.413666132 | 0.126132617 | 0.129908767 | 0           |
| 0.511988222 | 0.003464053 | 0.196784629 | 0           |
| 0.351366449 | 0.050834157 | 0.214366276 | 0           |
| 0.042593864 | 0.218316865 | 0.123805485 | 0           |

|             |             |             |             |
|-------------|-------------|-------------|-------------|
| 0.032684867 | 0.045951574 | 0.039512218 | 0           |
| 0.079256407 | 0.174622833 | 0.040113494 | 0           |
| 0.580205743 | 0.0727022   | 0.08331187  | 0           |
| 0.080348495 | 0.088478957 | 0.046752975 | 0           |
| 0.114001778 | 0.171430422 | 0.087844977 | 0.002859189 |
| 0.64355073  | 0.043898779 | 0.096366137 | 0           |
| 0.083238231 | 0.064243286 | 0.082942906 | 0.042359224 |
| 0.217400076 | 0.146123049 | 0.069014513 | 0           |
| 0.526723269 | 0.015098013 | 0.092335532 | 0.006884749 |
| 0.40461721  | 0.018637547 | 0.168302201 | 0           |
| 0.054522658 | 0.08565238  | 0.103944231 | 0.006179637 |
| 0.303374344 | 0.083017699 | 0.034471686 | 0           |
| 0.12602479  | 0.062191949 | 0.069874201 | 0           |
| 0.452992121 | 0.038313039 | 0.194248716 | 0           |
| 0.431043737 | 0.031009547 | 0.232280686 | 0           |
| 0.409435221 | 0           | 0.197215857 | 0           |
| 0.387402328 | 0.113321941 | 0.087598424 | 0           |
| 0.107100878 | 0.096089468 | 0.079723023 | 0           |
| 0.13508106  | 0.141173982 | 0.179889799 | 0.004736823 |
| 0.488375239 | 0.012026538 | 0.024785585 | 0           |
| 0.095007572 | 0.097538587 | 0.052859983 | 0.002961173 |
| 0.379536045 | 0.057960515 | 0.087449451 | 0           |
| 0.396487175 | 0           | 0.201106228 | 0           |
| 0.058428154 | 0.0831489   | 0.089616301 | 0           |
| 0.50528657  | 0           | 0.040335527 | 0           |
| 0.024713989 | 0.064293602 | 0.072643198 | 0           |
| 0.471210568 | 0           | 0.16402773  | 0           |
| 0.329192628 | 0.133862826 | 0.061552478 | 0           |
| 0.30485478  | 0.164300585 | 0.055037866 | 0.002750716 |
| 0.143539499 | 0.142511653 | 0.083684245 | 0.001308786 |
| 0.057471525 | 0.234732577 | 0.118342064 | 0           |
| 0.161789097 | 0.091360451 | 0.108876495 | 0           |
| 0.282507994 | 0.091261823 | 0.133978215 | 0           |
| 0.148086667 | 0.025069653 | 0.076382662 | 0           |
| 0.217015761 | 0           | 0.379543223 | 0           |
| 0.141840674 | 0.08314824  | 0.09882835  | 0           |
| 0.090550701 | 0.07660043  | 0.092158679 | 0.002952167 |
| 0.348904525 | 0.128956842 | 0.066831371 | 0           |
| 0.028177639 | 0.031112139 | 0.069087728 | 0           |
| 0.524110336 | 0.063833747 | 0.121584507 | 0           |
| 0.070607046 | 0.031505952 | 0.062006741 | 0           |
| 0.595286465 | 0.009831493 | 0.125427353 | 0           |
| 0.106609237 | 0.14647506  | 0.155486682 | 0           |
| 0.418355022 | 0.06022214  | 0.216428611 | 0           |
| 0.319965037 | 0.159476403 | 0.079698429 | 0           |
| 0.563742781 | 0.03233097  | 0.164519732 | 0           |
| 0.220030991 | 0.054659622 | 0.024385798 | 0           |
| 0.12589474  | 0.185115995 | 0.038680057 | 0           |
| 0.069693817 | 0.031697222 | 0.213090631 | 0           |
| 0.444473293 | 0.080453212 | 0.149826427 | 0           |
| 0.532279414 | 0.023140419 | 0.064471918 | 0           |
| 0.272416915 | 0.052388747 | 0.301594375 | 0           |
| 0.015673102 | 0.063507897 | 0.211118547 | 0.010948134 |
| 0.153999636 | 0.162516205 | 0.064853099 | 0           |
| 0.314389681 | 0.095726492 | 0.10062151  | 0           |
| 0.116994165 | 0.095803872 | 0.076369758 | 0.006402452 |
| 0.374634909 | 0.057736495 | 0.146916968 | 0           |
| 0.12219593  | 0.077061256 | 0.040400947 | 0           |

|             |             |             |             |
|-------------|-------------|-------------|-------------|
| 0.050713884 | 0.13865075  | 0.030481291 | 0.003009631 |
| 0.384885557 | 0.046788498 | 0.28351707  | 0           |
| 0.15266245  | 0.233180355 | 0.123270495 | 0           |
| 0.048965184 | 0.101126428 | 0.092454684 | 0.002631513 |
| 0.43987656  | 0.010815002 | 0.146805129 | 0           |
| 0.402572313 | 0.036108225 | 0.092665003 | 0           |
| 0.102628611 | 0.15892446  | 0.034849957 | 0.02846749  |
| 0.348943819 | 0.025169957 | 0.315989066 | 0           |
| 0.270221333 | 0.063806734 | 0.078691987 | 0           |
| 0.01906347  | 0.10832589  | 0.064017963 | 0           |
| 0.258924635 | 0.041999558 | 0.279927942 | 0           |
| 0.004899808 | 0.057715294 | 0.131222593 | 0           |
| 0.474050385 | 0.076389462 | 0.073716757 | 0           |
| 0.060187654 | 0.043767686 | 0.180020153 | 0           |
| 0.09612309  | 0.055624645 | 0.123863536 | 0           |
| 0.101919482 | 0.114439478 | 0.035152228 | 0.039936596 |
| 0.412858117 | 0.051350721 | 0.201078747 | 0           |
| 0.421523762 | 0.057326703 | 0.106122243 | 0           |
| 0.093856835 | 0.092093938 | 0.109722054 | 0           |
| 0.280730741 | 0.106599301 | 0.086081343 | 0.003683231 |
| 0.583056859 | 0.133968371 | 0.029836237 | 0.004636875 |
| 0.43896292  | 0.007902207 | 0.210741624 | 0           |
| 0.177228783 | 0.087581288 | 0.235546829 | 0.005500981 |
| 0.093201203 | 0.238305478 | 0.089138563 | 0.003500172 |
| 0.414622218 | 0.018448821 | 0.16338901  | 0           |
| 0.514252982 | 0.011484015 | 0.193036373 | 0           |
| 0.422581421 | 0           | 0.106746976 | 0           |
| 0.444388352 | 0.017552118 | 0.262848281 | 0           |
| 0.067521384 | 0.040334319 | 0.10807124  | 0           |
| 0.132674716 | 0.088330951 | 0.103946075 | 0           |
| 0.372965786 | 0.044110347 | 0.169148738 | 0           |
| 0.476805591 | 0.052519217 | 0.15519531  | 0           |
| 0.078582472 | 0.090234783 | 0.031192281 | 0.00117542  |
| 0.152544775 | 0.013885739 | 0.393815281 | 0.005046446 |
| 0.100025699 | 0.091079788 | 0.096233565 | 0.002067818 |
| 0.303635848 | 0.015454424 | 0.119676864 | 0.007780191 |
| 0.354934736 | 0.040250339 | 0.238242624 | 0           |
| 0.512174938 | 0.057032688 | 0.090852772 | 0           |
| 0.033389216 | 0.320606793 | 0.165759325 | 0           |
| 0.109287539 | 0.170179567 | 0.083070973 | 0           |



| Dendritic cells activated | Mast cells resting | Mast cells activated | Eosinophils | Neutrophils |
|---------------------------|--------------------|----------------------|-------------|-------------|
| 0.039441249               | 0.220590526        | 0                    | 0           | 0           |
| 0.002761972               | 0.057772573        | 0                    | 0           | 0           |
| 0                         | 0.06895799         | 0                    | 0           | 0           |
| 0                         | 0.05618077         | 0                    | 0           | 0.004894104 |
| 0.004999025               | 0.088948989        | 0                    | 0.01659677  | 0           |
| 0                         | 0.030006764        | 0                    | 0           | 0           |
| 0.01894014                | 0.096629073        | 0                    | 0           | 0           |
| 0                         | 0.017432266        | 0                    | 0           | 0           |
| 0                         | 0.037909702        | 0                    | 0           | 0           |
| 0                         | 0.006972275        | 0                    | 0           | 0           |
| 0.00540498                | 0.0424838          | 0                    | 0           | 0           |
| 0                         | 0.059032085        | 0                    | 0           | 0           |
| 0                         | 2.99E-05           | 0                    | 0           | 0           |
| 0                         | 0.061405129        | 0                    | 0           | 0           |
| 0.093627177               | 0.05583849         | 0                    | 0           | 0           |
| 0                         | 0.061701214        | 0                    | 0           | 0           |
| 0                         | 0.075248132        | 0                    | 0           | 0           |
| 0                         | 0.05988869         | 0                    | 0           | 0           |
| 0                         | 0.118694627        | 0                    | 0           | 0           |
| 0                         | 0                  | 0.011249132          | 0           | 0           |
| 0.008579009               | 0.032906895        | 0                    | 0           | 0           |
| 0                         | 0.038696862        | 0                    | 0           | 0           |
| 0.046913483               | 0.056618331        | 0                    | 0           | 0           |
| 0                         | 0.076336114        | 0                    | 0           | 0           |
| 0.010479973               | 0.03750479         | 0                    | 0           | 0           |
| 0                         | 0.036304186        | 0                    | 0           | 0           |
| 0                         | 0.068278225        | 0                    | 0           | 0           |
| 0.006858822               | 0.011037709        | 0                    | 0           | 0           |
| 0                         | 0                  | 0.024845829          | 0           | 0           |
| 0                         | 0.015363957        | 0                    | 0           | 0           |
| 0                         | 0.050553789        | 0                    | 0           | 0           |
| 0.040273415               | 0.044455461        | 0                    | 0           | 0           |
| 0                         | 0.049277789        | 0                    | 0           | 0           |
| 0.025390112               | 0.067048426        | 0                    | 0           | 0           |
| 0.02066031                | 0.055386604        | 0                    | 0.009865462 | 0           |
| 0                         | 0.058083944        | 0                    | 0           | 0           |
| 0.069030461               | 0.025476519        | 0                    | 0           | 0           |
| 0                         | 0.01769927         | 0                    | 0           | 0           |
| 0                         | 0.184319501        | 0                    | 0           | 0           |
| 0.014212573               | 0.012516337        | 0                    | 0           | 0           |
| 0.000182263               | 0.024327727        | 0                    | 0           | 0           |
| 0.031575979               | 0.092073105        | 0                    | 0.015236424 | 0           |
| 0                         | 0.034402977        | 0                    | 0           | 0.008247602 |
| 0                         | 0.052855596        | 0                    | 0           | 0.008200268 |
| 0.023505711               | 0.011016234        | 0                    | 0           | 0           |
| 0.016405728               | 0.028037737        | 0                    | 0           | 0           |
| 0                         | 0.079518675        | 0                    | 0           | 0           |
| 0.001773327               | 0.029850608        | 0                    | 0           | 0           |
| 0.000693895               | 0.084914821        | 0                    | 0           | 0           |
| 0                         | 0.029953041        | 0                    | 0           | 0           |
| 0.17976878                | 0                  | 0                    | 0           | 0.045608728 |
| 0                         | 0.076829969        | 0                    | 0           | 0           |
| 0.011524613               | 0.016186625        | 0                    | 0           | 0           |
| 0                         | 0.079145267        | 0                    | 0.00495454  | 0           |
| 0                         | 0.040744781        | 0                    | 0           | 0           |
| 0                         | 0.011717706        | 0                    | 0           | 0           |
| 0.031837063               | 0.017235699        | 0                    | 0           | 0.012576795 |

|             |             |             |             |             |
|-------------|-------------|-------------|-------------|-------------|
| 0           | 0.014884869 | 0           | 0           | 0           |
| 0           | 0.026514378 | 0           | 0           | 0           |
| 0           | 0.079078897 | 0           | 0           | 0           |
| 0           | 0.084488785 | 0           | 0           | 0           |
| 0           | 0           | 0           | 0.008262721 | 0           |
| 0           | 0.058993425 | 0           | 0           | 0           |
| 0           | 0.05116425  | 0           | 0           | 0           |
| 0           | 0.209970477 | 0           | 0           | 0           |
| 0.018732209 | 0.012996592 | 0           | 0           | 0           |
| 0           | 0.041240112 | 0           | 0           | 0           |
| 0.115518434 | 0.023885903 | 0           | 0           | 0           |
| 0           | 0.042937387 | 0           | 0           | 0           |
| 0           | 0.039067418 | 0           | 0           | 0           |
| 0           | 0.02380933  | 0           | 0           | 0           |
| 0           | 0.015236279 | 0           | 0           | 0           |
| 0           | 0.006612019 | 0           | 0           | 0           |
| 0           | 0.025320967 | 0           | 0           | 0           |
| 0.133407531 | 0           | 0           | 0           | 0           |
| 0           | 0.158756925 | 0           | 0           | 0           |
| 0           | 0.031004223 | 0           | 0           | 0           |
| 0.011133662 | 0.10185158  | 0           | 0           | 0           |
| 0.001216836 | 0.087626633 | 0           | 0           | 0           |
| 0           | 0.045672054 | 0           | 0           | 0           |
| 0           | 0.057375372 | 0           | 0.003645626 | 0           |
| 0.158912381 | 0           | 0.007298012 | 0           | 0           |
| 0.064878802 | 0.008760492 | 0           | 0           | 0           |
| 0.045200368 | 0.035554331 | 0           | 0           | 0           |
| 0.02243041  | 0.070257296 | 0           | 0           | 0           |
| 0           | 0.016203825 | 0           | 0           | 0           |
| 0.04956647  | 0.092517397 | 0           | 0           | 0           |
| 0.027070196 | 0.121192692 | 0           | 0           | 0           |
| 0           | 0.083334147 | 0           | 0           | 0           |
| 0           | 0.100293214 | 0           | 0           | 0           |
| 0           | 0.018299819 | 0           | 0           | 0           |
| 0.01168484  | 0           | 0           | 0           | 0           |
| 0           | 0.063443202 | 0           | 0           | 0           |
| 0           | 0.063186431 | 0           | 0.014884792 | 0           |
| 0.057775657 | 0.026210026 | 0           | 0           | 0.000552248 |
| 0.009166251 | 0.047210133 | 0           | 0           | 0           |
| 0           | 0.036099268 | 0           | 0           | 0           |
| 0           | 0.079414008 | 0           | 0           | 0           |
| 0           | 0.033780803 | 0           | 0           | 0           |
| 0.005498291 | 0.073860298 | 0           | 0           | 0           |
| 0.008393338 | 0.041265051 | 0           | 0           | 0           |
| 0.063282264 | 0.050301779 | 0           | 0           | 0           |
| 0           | 0.022175906 | 0           | 0           | 0           |
| 0.022401937 | 0.046441832 | 0           | 0           | 0           |
| 0           | 0.073708918 | 0           | 0           | 0           |
| 0           | 0.069806406 | 0           | 0           | 0           |
| 0           | 0.048484362 | 0           | 0           | 0           |
| 0           | 0           | 0.044815    | 0           | 0           |
| 0.011554953 | 0.051108726 | 0           | 0           | 0           |
| 0           | 0.03540857  | 0           | 0           | 0           |
| 0.112620419 | 0.077029471 | 0           | 0           | 0.002333142 |
| 0.023760636 | 0.012278434 | 0           | 0           | 0.01259888  |
| 0           | 0.033706052 | 0           | 0           | 0           |
| 0.005559258 | 0.006984682 | 0           | 0           | 0           |
| 0.005135187 | 0.003786069 | 0           | 0           | 0           |

|             |             |             |             |             |
|-------------|-------------|-------------|-------------|-------------|
| 0           | 0.054083023 | 0           | 0           | 0           |
| 0.039552789 | 0.032481154 | 0           | 0           | 0           |
| 0.018690602 | 0.023516806 | 0           | 0           | 0           |
| 0.01479584  | 0.031756164 | 0           | 0           | 0           |
| 0           | 0           | 0           | 0           | 0           |
| 0           | 0.038158559 | 0           | 0           | 0           |
| 0.00490363  | 0.038985864 | 0           | 0           | 0           |
| 0.017982348 | 0.202937203 | 0           | 0           | 0           |
| 0           | 0.071467872 | 0           | 0.000245767 | 0           |
| 0.022108425 | 0.015606962 | 0           | 0           | 0           |
| 0           | 0.071544949 | 0           | 0           | 0           |
| 0           | 0.0507808   | 0           | 0           | 0           |
| 0.052804216 | 0.008661821 | 0           | 0           | 0           |
| 3.08E-05    | 0.014452139 | 0           | 0           | 0           |
| 0.008679171 | 0.149870517 | 0           | 0           | 0.000218656 |
| 0           | 0           | 0           | 0           | 0           |
| 0.043088411 | 0.019304881 | 0           | 0           | 0           |
| 0           | 0.022840426 | 0           | 0           | 0           |
| 0.018625373 | 0.057740352 | 0           | 0           | 0           |
| 0.010144678 | 0.07999049  | 0           | 0.00186848  | 0           |
| 0           | 0.00371576  | 0           | 0           | 0.008025188 |
| 0.016826702 | 0.078198779 | 0.008896486 | 0           | 0           |
| 0.014116104 | 0.108344685 | 0           | 0           | 0           |
| 0.017114441 | 0.084041586 | 0           | 0           | 0           |
| 0           | 0           | 0.014347428 | 0           | 0           |
| 0.027166454 | 0.042820383 | 0           | 0           | 0           |
| 0.001047395 | 0.050071696 | 0           | 0           | 0           |
| 0.014819131 | 0.040615676 | 0           | 0           | 0           |
| 0.027042489 | 0.017026666 | 0           | 0           | 0           |
| 0           | 0           | 0.001948008 | 0           | 0           |
| 0           | 0           | 0           | 0           | 0           |
| 0.004294946 | 0           | 0           | 0           | 0           |
| 0           | 0.01701515  | 0           | 0           | 0           |
| 0           | 0.033673572 | 0           | 0           | 0           |
| 0           | 0.049269411 | 0           | 0           | 0           |
| 0.01539146  | 0.001469075 | 0           | 0.012029436 | 0           |
| 0           | 0.056875758 | 0           | 0           | 0           |
| 0           | 0           | 0           | 0           | 0           |
| 0           | 0.070421733 | 0           | 0           | 0           |
| 0           | 0.077728339 | 0           | 0           | 0           |
| 0           | 0.044715415 | 0           | 0.011642354 | 0           |
| 0           | 0.028662159 | 0.005126577 | 0           | 0           |
| 0           | 0           | 0.01188136  | 0           | 0           |
| 0.01813107  | 0           | 0.001672173 | 0           | 0           |
| 0           | 0.077704779 | 0           | 0           | 0           |
| 0           | 0.105106032 | 0           | 0           | 0           |
| 0.017106722 | 0.030768918 | 0           | 0           | 0           |
| 0           | 0           | 0           | 0           | 0           |
| 0.02208447  | 0.037215164 | 0           | 0           | 0           |
| 0           | 0.473205587 | 0           | 0           | 0           |
| 0.031727064 | 0.11341182  | 0           | 0           | 0           |
| 0.012386892 | 0.018906321 | 0           | 0           | 0           |
| 0           | 0.034661094 | 0           | 0           | 0           |
| 0           | 0.066822845 | 0           | 0           | 0           |
| 0           | 0.017620838 | 0           | 0           | 0           |
| 0.005434919 | 0.037187143 | 0           | 0.003134673 | 0           |
| 0.008305234 | 0.024919123 | 0           | 0           | 0           |
| 0.001721678 | 0.009723089 | 0           | 0           | 0           |

|             |             |             |             |             |
|-------------|-------------|-------------|-------------|-------------|
| 0.148833514 | 0.042247613 | 0           | 0           | 0           |
| 0.002279235 | 0.055550506 | 0           | 0           | 0           |
| 0.001771504 | 0.041903967 | 0           | 0           | 0           |
| 0           | 0.050230184 | 0           | 0           | 0           |
| 0           | 0.054645363 | 0           | 0           | 0           |
| 0           | 0.052438039 | 0           | 0           | 0           |
| 0.018124923 | 0.03768582  | 0           | 0           | 0.00053623  |
| 0.000352692 | 0.125306368 | 0           | 0           | 0           |
| 0.02322662  | 0           | 0.012702702 | 0           | 0           |
| 0           | 0.120180762 | 0           | 0           | 0           |
| 0           | 0.023185567 | 0           | 0           | 0           |
| 0           | 0.034724547 | 0           | 0           | 0           |
| 0           | 0.02019508  | 0           | 0           | 0           |
| 0           | 0.0349272   | 0           | 0           | 0           |
| 0           | 0.178877345 | 0           | 0           | 0           |
| 0           | 0.068763495 | 0           | 0           | 0           |
| 0.012565163 | 0.0462068   | 0           | 0           | 0.00477273  |
| 0           | 0.033821663 | 0           | 0           | 0           |
| 0.002551171 | 0.026778845 | 0           | 0           | 0           |
| 0           | 0.028970185 | 0           | 0           | 0           |
| 0.003978444 | 0.042514528 | 0           | 0.001174048 | 0.001070838 |
| 0           | 0.040969796 | 0           | 0           | 0           |
| 0           | 0.060132403 | 0           | 0           | 0           |
| 0           | 0           | 0           | 0           | 0           |
| 0.004814616 | 0.033392437 | 0           | 0           | 0           |
| 0.001069588 | 0.012014229 | 0           | 0           | 0           |
| 0.00697745  | 0.015285031 | 0           | 0           | 0           |
| 0           | 0.0132885   | 0           | 0           | 0           |
| 0           | 0.054831179 | 0           | 0           | 0           |
| 0           | 0           | 0           | 0           | 0           |
| 0           | 0.043719379 | 0           | 0           | 0           |
| 0.001126725 | 0.060535203 | 0           | 0           | 0           |
| 0           | 0.008899233 | 0           | 0           | 0           |
| 0           | 0.135635054 | 0           | 0           | 0           |
| 0           | 0.07270806  | 0           | 0.00501432  | 0           |
| 0           | 0.051436183 | 0           | 0           | 0           |
| 0           | 0.023002154 | 0           | 0           | 0           |
| 0.015286665 | 0.036315316 | 0           | 0           | 0           |
| 0.006926881 | 0.090410742 | 0           | 0           | 0           |
| 0           | 0.019913967 | 0           | 0           | 0           |
| 0           | 0.032474696 | 0           | 0           | 0           |
| 0.031694244 | 0.060512902 | 0           | 0           | 0           |
| 0           | 0.058243934 | 0           | 0           | 0           |
| 0           | 0.010215308 | 0           | 0           | 0           |
| 0           | 0.019413437 | 0           | 0           | 0           |
| 0           | 0           | 0           | 0           | 0           |
| 0.004431197 | 0.019765949 | 0           | 0           | 0           |
| 0           | 0.001069757 | 0           | 0           | 0           |
| 0           | 0.003140279 | 0           | 0           | 0           |
| 0           | 0.0816616   | 0           | 0.006017712 | 0           |
| 0           | 0.057628726 | 0           | 0           | 0           |
| 0           | 0.08115241  | 0           | 0           | 0           |
| 0           | 0.064029029 | 0           | 0           | 0           |
| 0.007603871 | 0.091273408 | 0           | 0           | 0           |
| 0.044481617 | 0.059591731 | 0           | 0           | 0           |
| 0           | 0.038222041 | 0           | 0           | 0           |
| 0           | 0.042278723 | 0           | 0           | 0           |
| 0.030344081 | 0.025268974 | 0           | 0           | 0           |

|             |             |             |             |             |
|-------------|-------------|-------------|-------------|-------------|
| 0.121883478 | 0           | 0.001081158 | 0           | 0           |
| 0.007714204 | 0.01026812  | 0           | 0           | 0           |
| 0           | 0.030071719 | 0           | 0           | 0           |
| 0.005669228 | 0.038739122 | 0           | 0           | 0.000267553 |
| 0.004883258 | 0.011355372 | 0           | 0           | 0           |
| 0.000829523 | 0.052675725 | 0           | 0           | 0           |
| 0.011064909 | 0.006780532 | 0           | 0           | 0           |
| 0           | 0.031782651 | 0           | 0           | 0           |
| 0           | 0.00911205  | 0           | 0           | 0.008851841 |
| 0           | 0.024281903 | 0           | 0           | 0.008780506 |
| 0           | 0.058674231 | 0           | 0           | 0           |
| 0           | 0.032505051 | 0           | 0           | 0           |
| 0           | 0.042505926 | 0           | 0           | 0           |
| 0           | 0.064294299 | 0           | 0           | 0           |
| 0           | 0.019999277 | 0           | 0           | 0           |
| 0           | 0.042889745 | 0           | 0           | 0           |
| 0           | 0.014269694 | 0           | 0           | 0           |
| 0           | 0.015699741 | 0           | 0           | 0           |
| 0           | 0.025567358 | 0           | 0           | 0           |
| 0.012839741 | 0.020772846 | 0           | 0           | 0           |
| 0           | 0.020962449 | 0           | 0.011555639 | 0           |
| 0           | 0.03898964  | 0           | 0           | 0           |
| 0           | 0.041890191 | 0           | 0           | 0           |
| 0           | 0.103334808 | 0           | 0           | 0           |
| 0.015245241 | 0.061090641 | 0           | 0.001825399 | 0           |
| 0.001207041 | 0.049453895 | 0           | 0           | 0           |
| 0           | 0.019544209 | 0           | 0           | 0           |
| 0           | 0.008160524 | 0           | 0           | 0           |
| 0           | 0.024293896 | 0           | 0           | 0           |
| 0           | 0.081826738 | 0           | 0           | 0           |
| 0.049912894 | 0.016116365 | 0           | 0           | 0           |
| 0.006657145 | 0           | 0.004589457 | 0           | 0           |
| 0.0219761   | 0.036325922 | 0           | 0           | 0           |
| 0           | 0.044699693 | 0           | 0           | 0           |
| 0           | 0.120838456 | 0           | 0           | 0           |
| 0.024158683 | 0.054972891 | 0           | 0           | 0           |
| 0.021203261 | 0.005060687 | 0           | 0           | 0           |
| 0.038334227 | 0.03258611  | 0           | 0           | 0           |
| 4.54E-05    | 0.097001232 | 0           | 0           | 0           |
| 0           | 0.036699506 | 0           | 0           | 0           |
| 0           | 0           | 0           | 0           | 0           |
| 0.000321449 | 0.019792023 | 0           | 0           | 0           |
| 0           | 0.035296333 | 0           | 0           | 0           |
| 0           | 0.031480101 | 0           | 0           | 0           |
| 0           | 0.045721194 | 0           | 0           | 0           |
| 0           | 0.022352054 | 0           | 0           | 0           |
| 0.011394697 | 0.039065537 | 0           | 0           | 0           |
| 0.013458116 | 0.044191056 | 0           | 0           | 0           |
| 0           | 0.007773261 | 0           | 0           | 0           |
| 0.001433961 | 0.173066331 | 0           | 0           | 0           |
| 0           | 0.020017545 | 0           | 0           | 0           |
| 0.00144325  | 0.094247728 | 0           | 0           | 0.005531314 |
| 0           | 0.074657764 | 0           | 0           | 0           |
| 0           | 0.038787979 | 0           | 0           | 0           |
| 0.00418799  | 0.031991647 | 0           | 0           | 0           |
| 0           | 0.00256866  | 0           | 0.000904739 | 0           |
| 0           | 0.015445604 | 0           | 0           | 0           |
| 0           | 0.0167067   | 0           | 0           | 0           |

|             |             |             |             |             |
|-------------|-------------|-------------|-------------|-------------|
| 0           | 0.022661615 | 0           | 0           | 0           |
| 0.082022763 | 0.061345867 | 0           | 0           | 0           |
| 0.010729625 | 0           | 0           | 0           | 0           |
| 0           | 0.007409992 | 0           | 0           | 0           |
| 0           | 0.032280309 | 0           | 0           | 0           |
| 0           | 0.023941758 | 0           | 0           | 0           |
| 0           | 0.07702421  | 0           | 0           | 0           |
| 0           | 0.050284741 | 0           | 0           | 0           |
| 0           | 0.033393353 | 0           | 0           | 0           |
| 0.007508001 | 0.055506228 | 0           | 0           | 0           |
| 0           | 0.031461822 | 0           | 0           | 0           |
| 0           | 0.089778636 | 0           | 0           | 0           |
| 0           | 0.03502917  | 0           | 0           | 0           |
| 0.001584446 | 0.013093381 | 0           | 0           | 0           |
| 0           | 0.023806896 | 0           | 0           | 0           |
| 0           | 0.096217224 | 0           | 0           | 0           |
| 0           | 0           | 0.033999876 | 0           | 0           |
| 0           | 0.092188135 | 0           | 0           | 0.000257635 |
| 0           | 0.069605609 | 0           | 0           | 0           |
| 0           | 0.079633227 | 0           | 0.005512239 | 0           |
| 0           | 0.025061226 | 0           | 0           | 0           |
| 0.029523007 | 0.074470989 | 0           | 0           | 0           |
| 0           | 0           | 0           | 0           | 0           |
| 0.011642018 | 0.042830525 | 0           | 0           | 0           |
| 0           | 0.070600303 | 0           | 0           | 0           |
| 0.006994062 | 0.041673699 | 0           | 0           | 0           |
| 0           | 0.041443476 | 0           | 0           | 0           |
| 0           | 0.047072211 | 0           | 0           | 0           |
| 0           | 0.024203556 | 0           | 0           | 0           |
| 0           | 0.031119727 | 0           | 0           | 0           |
| 0.014941595 | 0.016032352 | 0           | 0           | 0           |
| 0           | 0.088161207 | 0           | 0           | 0           |
| 0           | 0.077214715 | 0           | 0           | 0           |
| 0           | 0.000765933 | 0           | 0           | 0           |
| 0.000959079 | 0.06223669  | 0           | 0.005436086 | 0           |
| 0           | 0.039146509 | 0           | 0           | 0           |
| 0           | 0.058141714 | 0           | 0.003957291 | 0           |
| 0           | 0.030351976 | 0           | 0           | 0           |
| 0           | 0           | 0           | 0           | 0           |
| 0           | 0.011656625 | 0           | 0           | 0           |
| 0           | 0.021056582 | 0           | 0           | 0           |
| 0           | 0.083546806 | 0           | 0           | 0.003470337 |
| 0           | 0.07041719  | 0           | 0           | 0           |
| 0           | 0.036784049 | 0           | 0           | 0           |
| 0.122231741 | 0           | 0.004142172 | 0           | 0           |
| 0           | 0.018490465 | 0           | 0           | 0           |
| 1.25E-05    | 0.020882245 | 0           | 0           | 0           |
| 0           | 0.029652248 | 0           | 0           | 0           |
| 0           | 0.076957029 | 0           | 0           | 0.007260836 |
| 0           | 0.056036561 | 0           | 0           | 0           |
| 0           | 0.034132758 | 0           | 0           | 0           |
| 0           | 0.115925366 | 0           | 0.007827559 | 0           |
| 0           | 0.078804194 | 0           | 0           | 0           |
| 0           | 0.026066393 | 0           | 0           | 0           |
| 0           | 0.034665221 | 0           | 0           | 0           |
| 0.018347863 | 0.066165875 | 0           | 0           | 0           |
| 0.008411454 | 0.046826236 | 0           | 0           | 0           |
| 0           | 0.048394014 | 0           | 0           | 0           |

|             |             |             |   |             |
|-------------|-------------|-------------|---|-------------|
| 0.007184009 | 0.002285178 | 0           | 0 | 0           |
| 0.019517386 | 0.029891925 | 0           | 0 | 0           |
| 0           | 0.011246931 | 0           | 0 | 0           |
| 0.01061065  | 0.006616029 | 0           | 0 | 0           |
| 0           | 0.0551047   | 0           | 0 | 0           |
| 0           | 0.02934771  | 0           | 0 | 0           |
| 0           | 0.005562376 | 0           | 0 | 0           |
| 0           | 0.049230909 | 0           | 0 | 0           |
| 0           | 0.07282875  | 0           | 0 | 0           |
| 0.005995253 | 0.08282699  | 0           | 0 | 0           |
| 0           | 0.043313715 | 0           | 0 | 0           |
| 0.015865709 | 0.001216894 | 0           | 0 | 0           |
| 0.008659028 | 0.000462477 | 0           | 0 | 0           |
| 0           | 0.015959608 | 0           | 0 | 0           |
| 0.010177141 | 0.00577569  | 0           | 0 | 0           |
| 0.021224352 | 0.077158722 | 0           | 0 | 0           |
| 0           | 0.047573843 | 0           | 0 | 0           |
| 0           | 0.014504352 | 0           | 0 | 0           |
| 0           | 0.100228642 | 0           | 0 | 0           |
| 0.052386542 | 0.008493253 | 0           | 0 | 0           |
| 0           | 0.068178099 | 0           | 0 | 0           |
| 0           | 0.065872969 | 0           | 0 | 0           |
| 0.068842354 | 0.101219349 | 0           | 0 | 0           |
| 0           | 0.00292966  | 0           | 0 | 0           |
| 0.015495093 | 0.008100164 | 0           | 0 | 0           |
| 0.019593686 | 0.008946887 | 0           | 0 | 0           |
| 0.104099488 | 0           | 0.019144539 | 0 | 0           |
| 0           | 0.021724738 | 0           | 0 | 0           |
| 0           | 0.019153466 | 0           | 0 | 0           |
| 0           | 0.014684123 | 0           | 0 | 0           |
| 0           | 0.04731342  | 0           | 0 | 0           |
| 0.004403243 | 0.017051958 | 0           | 0 | 0           |
| 0           | 0.04507733  | 0           | 0 | 0           |
| 0.000881631 | 0.014079043 | 0           | 0 | 0           |
| 0.04039629  | 0.040794707 | 0           | 0 | 0.00459901  |
| 0.00619667  | 0.020409763 | 0           | 0 | 0           |
| 0           | 0.027849707 | 0           | 0 | 0           |
| 0           | 0.027948393 | 0           | 0 | 0           |
| 0           | 0           | 0           | 0 | 0           |
| 0           | 0.021064279 | 0           | 0 | 0           |
| 0.003218767 | 0           | 0           | 0 | 0           |
| 0.007929021 | 0.01282527  | 0           | 0 | 0           |
| 0.088076561 | 0.034490621 | 0           | 0 | 0           |
| 0           | 0.039039751 | 0           | 0 | 0           |
| 0           | 0.027992122 | 0           | 0 | 0           |
| 0           | 0.069260881 | 0           | 0 | 0           |
| 0           | 0           | 0.011359654 | 0 | 0           |
| 0           | 0.044789585 | 0           | 0 | 0           |
| 0.051609128 | 0.022496025 | 0           | 0 | 0           |
| 0           | 0.01160126  | 0           | 0 | 0           |
| 0.006190271 | 0           | 0.033293858 | 0 | 0           |
| 0           | 0.030755755 | 0           | 0 | 0.002385649 |
| 0           | 0.025156856 | 0           | 0 | 0           |
| 0.071057971 | 0.006065364 | 0           | 0 | 0           |
| 0.006515653 | 0           | 0           | 0 | 0           |
| 0.012599187 | 0.010685748 | 0           | 0 | 0           |
| 0           | 0.058872473 | 0           | 0 | 0           |
| 0           | 0.005930954 | 0           | 0 | 0           |

|             |             |   |   |             |
|-------------|-------------|---|---|-------------|
| 0           | 0.020055837 | 0 | 0 | 0           |
| 0           | 0.023402575 | 0 | 0 | 0           |
| 0           | 0.026149539 | 0 | 0 | 0           |
| 0.016679043 | 0.016700365 | 0 | 0 | 0           |
| 0           | 0.039577516 | 0 | 0 | 0           |
| 0           | 0.119806662 | 0 | 0 | 0           |
| 0.023888434 | 0.026544192 | 0 | 0 | 0           |
| 0           | 0.024440866 | 0 | 0 | 0           |
| 0           | 0.003303951 | 0 | 0 | 0           |
| 0.009291119 | 0           | 0 | 0 | 0           |
| 0           | 0.053852084 | 0 | 0 | 7.56E-05    |
| 0.016758187 | 0.035225485 | 0 | 0 | 0           |
| 0           | 0.050795005 | 0 | 0 | 0           |
| 0           | 0.038431371 | 0 | 0 | 0           |
| 0           | 0.021653755 | 0 | 0 | 0           |
| 0           | 0.037791526 | 0 | 0 | 0           |
| 0           | 0.12734236  | 0 | 0 | 0           |
| 0.001517852 | 0.003568827 | 0 | 0 | 0           |
| 0           | 0.035047922 | 0 | 0 | 0           |
| 0           | 0.053902461 | 0 | 0 | 0           |
| 0           | 0.001538457 | 0 | 0 | 0.006091287 |
| 0.012607588 | 0.055117283 | 0 | 0 | 0           |
| 0           | 0.044144249 | 0 | 0 | 0           |
| 0           | 0.068086538 | 0 | 0 | 0.003499757 |
| 0.016401794 | 0.042435965 | 0 | 0 | 0           |
| 0.004587898 | 0.007296147 | 0 | 0 | 0           |
| 0           | 0.058338486 | 0 | 0 | 0           |
| 0           | 0.076917435 | 0 | 0 | 0           |
| 0           | 0.012139945 | 0 | 0 | 0           |
| 0           | 0.015197003 | 0 | 0 | 0           |
| 0.037572222 | 0.010955704 | 0 | 0 | 0           |
| 0           | 0.042289682 | 0 | 0 | 0           |
| 0           | 0.004336636 | 0 | 0 | 0           |
| 0           | 0.067604188 | 0 | 0 | 0.015543516 |
| 0           | 0.044997909 | 0 | 0 | 0           |
| 0.025499791 | 0.00964356  | 0 | 0 | 0           |
| 0           | 0.047407718 | 0 | 0 | 0           |
| 0           | 0.056074999 | 0 | 0 | 0           |
| 0           | 0.059580829 | 0 | 0 | 0           |
| 9.75E-05    | 0           | 0 | 0 | 0           |
