# Supplementary material for: Comprehensive analysis of cuproptosis-related long non-coding RNA signature and personalized therapeutic strategy of breast cancer patients
Source: PubMed Central journal article supplement (PMC9815178; doi:10.3389/fonc.2022.1081089), 2022-12-22
Supplement: Table_1.pdf [file Table_1.pdf]

## LncRNAs correlated with cuproptosis

| cuproptosis Gene | lncRNA      | cor         | pvalue   | Regulation |
|------------------|-------------|-------------|----------|------------|
| CDKN2A           | RUNX3-AS1   | 0.331688495 | 4.79E-23 | postive    |
| CDKN2A           | CAMTA1-DT   | 0.346190451 | 4.35E-25 | postive    |
| PDHA1            | CAMTA1-DT   | 0.324117683 | 5.06E-22 | postive    |
| CDKN2A           | LINC00337   | 0.316583512 | 4.94E-21 | postive    |
| CDKN2A           | PIK3CD-AS2  | 0.330032105 | 8.07E-23 | postive    |
| DLAT             | DEPDC1-AS1  | 0.325730824 | 3.08E-22 | postive    |
| CDKN2A           | DEPDC1-AS1  | 0.34910255  | 1.64E-25 | postive    |
| PDHA1            | DEPDC1-AS1  | 0.384175988 | 5.74E-31 | postive    |
| MTF1             | DLEU2L      | 0.391080264 | 4.02E-32 | postive    |
| MTF1             | ERI3-IT1    | 0.30889419  | 4.74E-20 | postive    |
| CDKN2A           | PRKACB-DT   | 0.320040408 | 1.75E-21 | postive    |
| PDHA1            | PRKACB-DT   | 0.304586489 | 1.63E-19 | postive    |
| GLS              | LINC01140   | 0.363199323 | 1.27E-27 | postive    |
| PDHA1            | LINC02609   | 0.348281546 | 2.17E-25 | postive    |
| GLS              | LINC02609   | 0.375849332 | 1.31E-29 | postive    |
| CDKN2A           | SLC16A1-AS1 | 0.474585735 | 1.86E-48 | postive    |
| PDHA1            | SLC16A1-AS1 | 0.331884748 | 4.51E-23 | postive    |
| GLS              | SLC16A1-AS1 | 0.356900464 | 1.15E-26 | postive    |
| CDKN2A           | LINC01356   | 0.478001533 | 3.16E-49 | postive    |
| CDKN2A           | LINC01731   | 0.302166233 | 3.24E-19 | postive    |
| PDHB             | DCST1-AS1   | 0.306817682 | 8.63E-20 | postive    |
| CDKN2A           | ZNF687-AS1  | 0.356950852 | 1.13E-26 | postive    |
| PDHA1            | ZNF687-AS1  | 0.41795697  | 6.88E-37 | postive    |
| CDKN2A           | RFX5-AS1    | 0.404791388 | 1.69E-34 | postive    |
| PDHA1            | RFX5-AS1    | 0.326889335 | 2.15E-22 | postive    |
| PDHA1            | PCAT6       | 0.43502313  | 3.79E-40 | postive    |
| PDHA1            | LINC01354   | 0.329225275 | 1.04E-22 | postive    |
| GLS              | LINC01354   | 0.33081769  | 6.31E-23 | postive    |
| LIAS             | CCDC18-AS1  | 0.307549367 | 6.99E-20 | postive    |
| CDKN2A           | RASAL2-AS1  | 0.340966675 | 2.44E-24 | postive    |
| GLS              | RASAL2-AS1  | 0.347273277 | 3.03E-25 | postive    |
| PDHA1            | C1orf220    | -0.31308542 | 1.39E-20 | negative   |
| FDX1             | LEMD1-AS1   | 0.371707212 | 5.98E-29 | postive    |
| GLS              | LEMD1-AS1   | 0.335624911 | 1.37E-23 | postive    |
| CDKN2A           | LINC02869   | 0.307970476 | 6.19E-20 | postive    |
| PDHA1            | LINC01740   | 0.311550479 | 2.19E-20 | postive    |
| CDKN2A           | LEMD1-DT    | 0.336144152 | 1.16E-23 | postive    |
| GLS              | LEMD1-DT    | 0.315472579 | 6.88E-21 | postive    |
| MTF1             | COA6-AS1    | -0.30374645 | 2.07E-19 | negative   |
| GLS              | LINC01036   | 0.305545112 | 1.24E-19 | postive    |
| MTF1             | PINK1-AS    | 0.325872236 | 2.95E-22 | postive    |
| CDKN2A           | FOXD2-AS1   | 0.308023682 | 6.10E-20 | postive    |
| CDKN2A           | LRRRC8C-DT  | 0.312232064 | 1.79E-20 | postive    |
| MTF1             | MKNK1-AS1   | 0.428826294 | 6.07E-39 | postive    |
| MTF1             | PABPC4-AS1  | 0.386749753 | 2.15E-31 | postive    |
| CDKN2A           | MIR9-1HG    | 0.337734474 | 6.96E-24 | postive    |
| PDHB             | GAS5-AS1    | 0.30145953  | 3.96E-19 | postive    |
| CDKN2A           | LINC01357   | 0.377227618 | 7.84E-30 | postive    |
| MTF1             | EFCAB14-AS1 | 0.358936806 | 5.67E-27 | postive    |

|        |              |             |          |         |
|--------|--------------|-------------|----------|---------|
| PDHB   | LINC00467    | 0.415390709 | 2.05E-36 | postive |
| CDKN2A | MED8-AS1     | 0.311398896 | 2.29E-20 | postive |
| PDHA1  | MED8-AS1     | 0.322825518 | 7.51E-22 | postive |
| GLS    | MED8-AS1     | 0.313371683 | 1.28E-20 | postive |
| MTF1   | LINC01128    | 0.304054457 | 1.90E-19 | postive |
| PDHA1  | TDRKH-AS1    | 0.307107346 | 7.94E-20 | postive |
| CDKN2A | SNHG3        | 0.468887452 | 3.42E-47 | postive |
| PDHA1  | SNHG3        | 0.330037895 | 8.06E-23 | postive |
| CDKN2A | SNHG12       | 0.556466286 | 1.52E-69 | postive |
| PDHA1  | SNHG12       | 0.323634277 | 5.87E-22 | postive |
| CDKN2A | RNASEH1-AS1  | 0.300259035 | 5.55E-19 | postive |
| PDHA1  | RNASEH1-AS1  | 0.351005049 | 8.65E-26 | postive |
| CDKN2A | LAPTM4A-DT   | 0.301711479 | 3.69E-19 | postive |
| CDKN2A | LINC01460    | 0.465792337 | 1.63E-46 | postive |
| PDHA1  | LINC01460    | 0.397000626 | 3.90E-33 | postive |
| GLS    | LINC01460    | 0.363870205 | 1.00E-27 | postive |
| CDKN2A | PPP4R3B-DT   | 0.302399627 | 3.04E-19 | postive |
| PDHA1  | PPP4R3B-DT   | 0.324973256 | 3.89E-22 | postive |
| GLS    | LINC01883    | 0.414160799 | 3.45E-36 | postive |
| GLS    | LINC02613    | 0.351115415 | 8.33E-26 | postive |
| CDKN2A | LGALSL-DT    | 0.356715504 | 1.23E-26 | postive |
| GLS    | ATP6V1B1-AS1 | 0.33803847  | 6.31E-24 | postive |
| CDKN2A | LINC01143    | 0.367725273 | 2.53E-28 | postive |
| PDHA1  | LINC01143    | 0.315906229 | 6.05E-21 | postive |
| GLS    | SIX3-AS1     | 0.302865461 | 2.66E-19 | postive |
| GLS    | TCF7L1-IT1   | 0.421603445 | 1.44E-37 | postive |
| PDHA1  | PPP1R21-DT   | 0.329807507 | 8.66E-23 | postive |
| CDKN2A | LINC01956    | 0.495461431 | 2.67E-53 | postive |
| PDHA1  | LINC01956    | 0.402268999 | 4.71E-34 | postive |
| GLS    | LINC01956    | 0.362847063 | 1.44E-27 | postive |
| CDKN2A | HK2-DT       | 0.326111901 | 2.74E-22 | postive |
| GLS    | STEAP3-AS1   | 0.312018346 | 1.91E-20 | postive |
| PDHA1  | PKP4-AS1     | 0.315372892 | 7.09E-21 | postive |
| CDKN2A | THORLNC      | 0.309004529 | 4.59E-20 | postive |
| GLS    | ARHGAP15-AS1 | 0.339502467 | 3.93E-24 | postive |
| FDX1   | HECW2-AS1    | 0.323110957 | 6.89E-22 | postive |
| CDKN2A | NCKAP5-AS2   | 0.327013735 | 2.07E-22 | postive |
| GLS    | NCKAP5-AS2   | 0.380846483 | 2.03E-30 | postive |
| GLS    | BOK-AS1      | 0.323861504 | 5.47E-22 | postive |
| CDKN2A | SPATA3-AS1   | 0.411411986 | 1.09E-35 | postive |
| CDKN2A | ARNILA       | 0.34747926  | 2.83E-25 | postive |
| DLD    | SOS1-IT1     | 0.333975807 | 2.32E-23 | postive |
| DLAT   | SOS1-IT1     | 0.36158024  | 2.25E-27 | postive |
| CDKN2A | SOS1-IT1     | 0.352466893 | 5.26E-26 | postive |
| PDHA1  | SOS1-IT1     | 0.398906542 | 1.82E-33 | postive |
| GLS    | SOS1-IT1     | 0.313239124 | 1.33E-20 | postive |
| CDKN2A | LINC00487    | 0.328677811 | 1.23E-22 | postive |
| PDHB   | ENTPD3-AS1   | 0.394393422 | 1.10E-32 | postive |
| PDHB   | CYB561D2     | 0.341934008 | 1.78E-24 | postive |
| GLS    | FAM3D-AS1    | 0.30097588  | 4.54E-19 | postive |
| FDX1   | LINC00636    | 0.413314807 | 4.92E-36 | postive |

|        |              |             |           |          |
|--------|--------------|-------------|-----------|----------|
| CDKN2A | SAMMSON      | 0.340585444 | 2.76E-24  | postive  |
| MTF1   | SUCLG2-AS1   | 0.335953353 | 1.23E-23  | postive  |
| MTF1   | LINC02035    | 0.310832337 | 2.70E-20  | postive  |
| CDKN2A | ST3GAL6-AS1  | 0.346041933 | 4.57E-25  | postive  |
| GLS    | ST3GAL6-AS1  | 0.395146618 | 8.14E-33  | postive  |
| CDKN2A | TIMMDC1-DT   | 0.375041188 | 1.76E-29  | postive  |
| PDHA1  | TIMMDC1-DT   | 0.46960301  | 2.38E-47  | postive  |
| CDKN2A | ARHGAP31-AS1 | 0.320998805 | 1.31E-21  | postive  |
| PDHA1  | ARHGAP31-AS1 | 0.300816814 | 4.74E-19  | postive  |
| GLS    | ARHGAP31-AS1 | 0.340974832 | 2.43E-24  | postive  |
| CDKN2A | LINC02044    | 0.430212385 | 3.28E-39  | postive  |
| PDHA1  | LINC02044    | 0.368913667 | 1.65E-28  | postive  |
| CDKN2A | LINC00881    | 0.349511389 | 1.43E-25  | postive  |
| DLAT   | NCK1-DT      | 0.316935473 | 4.45E-21  | postive  |
| CDKN2A | NCK1-DT      | 0.40360453  | 2.74E-34  | postive  |
| PDHA1  | NCK1-DT      | 0.402786981 | 3.81E-34  | postive  |
| GLS    | LNC SRLR     | 0.322249223 | 8.96E-22  | postive  |
| PDHB   | STAH2-AS1    | 0.305121911 | 1.40E-19  | postive  |
| PDHA1  | ARHGEF26-AS1 | 0.321311603 | 1.19E-21  | postive  |
| CDKN2A | TM4SF1-AS1   | 0.302275138 | 3.15E-19  | postive  |
| PDHB   | DLG1-AS1     | 0.39654271  | 4.68E-33  | postive  |
| CDKN2A | MELTF-AS1    | 0.498466575 | 5.02E-54  | postive  |
| PDHA1  | MELTF-AS1    | 0.415771149 | 1.74E-36  | postive  |
| CDKN2A | LINC01968    | 0.301864971 | 3.53E-19  | postive  |
| CDKN2A | ATP13A5-AS1  | 0.304459575 | 1.69E-19  | postive  |
| PDHA1  | ATP13A5-AS1  | 0.397048235 | 3.83E-33  | postive  |
| GLS    | ATP13A5-AS1  | 0.301161294 | 4.31E-19  | postive  |
| GLS    | MBNL1-AS1    | 0.329828371 | 8.61E-23  | postive  |
| PDHA1  | LINC02004    | 0.364682588 | 7.50E-28  | postive  |
| PDHB   | PRKAR2A-AS1  | 0.446598822 | 1.82E-42  | postive  |
| MTF1   | ARIH2OS      | -0.31213101 | 1.85E-20  | negative |
| PDHB   | ARIH2OS      | 0.36857842  | 1.86E-28  | postive  |
| MTF1   | PSMD6-AS2    | 0.354792132 | 2.38E-26  | postive  |
| CDKN2A | MYLK-AS1     | 0.40595046  | 1.05E-34  | postive  |
| PDHA1  | MYLK-AS1     | 0.313950265 | 1.08E-20  | postive  |
| PDHA1  | PRRT3-AS1    | 0.325595738 | 3.21E-22  | postive  |
| CDKN2A | LINC02043    | 0.502113317 | 6.47E-55  | postive  |
| PDHA1  | LINC02043    | 0.336735083 | 9.60E-24  | postive  |
| FDX1   | LINC01391    | 0.817495916 | 3.02E-203 | postive  |
| MTF1   | ZKSCAN7-AS1  | 0.372447015 | 4.57E-29  | postive  |
| GLS    | SATB1-AS1    | 0.321508935 | 1.12E-21  | postive  |
| PDHA1  | THUMPD3-AS1  | 0.306827393 | 8.60E-20  | postive  |
| DLAT   | H1-10-AS1    | -0.33797342 | 6.44E-24  | negative |
| PDHA1  | LINC00504    | -0.32607276 | 2.77E-22  | negative |
| LIAS   | LINC02482    | 0.336466921 | 1.05E-23  | postive  |
| LIAS   | LINC02447    | 0.315962748 | 5.95E-21  | postive  |
| MTF1   | STX18-AS1    | 0.309008444 | 4.59E-20  | postive  |
| CDKN2A | TAPT1-AS1    | -0.33421222 | 2.15E-23  | negative |
| PDHA1  | TAPT1-AS1    | -0.30408866 | 1.88E-19  | negative |
| CDKN2A | HNRNPD-DT    | 0.461944754 | 1.11E-45  | postive  |
| PDHA1  | HNRNPD-DT    | 0.348150891 | 2.26E-25  | postive  |

|        |               |             |                   |
|--------|---------------|-------------|-------------------|
| LIAS   | SNHG8         | 0.437147158 | 1.44E-40 positive |
| CDKN2A | WDFY3-AS2     | -0.30108126 | 4.40E-19 negative |
| PDHB   | BMPR1B-DT     | 0.337009762 | 8.79E-24 positive |
| CDKN2A | FAM198B-AS1   | -0.31187216 | 1.99E-20 negative |
| CDKN2A | DANCR         | 0.308831348 | 4.83E-20 positive |
| PDHA1  | DANCR         | 0.337615853 | 7.23E-24 positive |
| GLS    | SAP30-DT      | 0.307071123 | 8.02E-20 positive |
| LIAS   | UGDH-AS1      | 0.397463234 | 3.25E-33 positive |
| LIAS   | NOP14-AS1     | 0.337224556 | 8.20E-24 positive |
| LIAS   | STIM2-AS1     | 0.363654874 | 1.08E-27 positive |
| CDKN2A | AFAP1-AS1     | 0.42160815  | 1.43E-37 positive |
| GLS    | AFAP1-AS1     | 0.302729674 | 2.77E-19 positive |
| PDHB   | UBE2D3-AS1    | 0.321365006 | 1.17E-21 positive |
| CDKN2A | CTD-2297D10.2 | 0.321629465 | 1.08E-21 positive |
| CDKN2A | ANKH-DT       | 0.368542613 | 1.88E-28 positive |
| DLAT   | NNT-AS1       | 0.315211682 | 7.44E-21 positive |
| GLS    | LINC02065     | 0.342154672 | 1.65E-24 positive |
| PDHB   | TTC23L-AS1    | 0.334405646 | 2.02E-23 positive |
| LIAS   | EPB41L4A-AS1  | 0.41148273  | 1.06E-35 positive |
| CDKN2A | LINC01950     | 0.302266075 | 3.15E-19 positive |
| CDKN2A | LINC01170     | 0.326059178 | 2.78E-22 positive |
| MTF1   | LINC01023     | -0.34229305 | 1.58E-24 negative |
| PDHB   | PPP2CA-DT     | 0.30758716  | 6.91E-20 positive |
| CDKN2A | MIR3142HG     | 0.343109826 | 1.21E-24 positive |
| PDHA1  | SAP30L-AS1    | -0.30826666 | 5.68E-20 negative |
| CDKN2A | KCNIP1-AS1    | 0.343110436 | 1.21E-24 positive |
| PDHA1  | KCNIP1-AS1    | 0.402550231 | 4.20E-34 positive |
| CDKN2A | ZNF454-DT     | 0.35530594  | 1.99E-26 positive |
| CDKN2A | PRR7-AS1      | 0.422261496 | 1.08E-37 positive |
| GLS    | PRR7-AS1      | 0.36073453  | 3.02E-27 positive |
| DLAT   | SNHG4         | 0.301128914 | 4.35E-19 positive |
| CDKN2A | SNHG4         | 0.306352084 | 9.86E-20 positive |
| GLS    | SNHG4         | 0.326094012 | 2.75E-22 positive |
| GLS    | SH3TC2-DT     | 0.30342202  | 2.27E-19 positive |
| CDKN2A | LINC02159     | 0.378971035 | 4.09E-30 positive |
| PDHA1  | LINC02159     | 0.396082395 | 5.62E-33 positive |
| FDX1   | FABP6-AS1     | 0.633006988 | 2.29E-95 positive |
| CDKN2A | FOXCUT        | 0.336522385 | 1.03E-23 positive |
| CDKN2A | FOXF2-DT      | 0.369781905 | 1.20E-28 positive |
| PDHA1  | JARID2-DT     | 0.306293238 | 1.00E-19 positive |
| GLS    | LINC02521     | 0.311487272 | 2.23E-20 positive |
| GLS    | LINC00518     | 0.407897397 | 4.71E-35 positive |
| CDKN2A | LINC01600     | 0.368422689 | 1.97E-28 positive |
| GLS    | LINC01600     | 0.318393824 | 2.88E-21 positive |
| CDKN2A | LINC00240     | 0.316937452 | 4.45E-21 positive |
| DLD    | LYRM4-AS1     | 0.33317692  | 2.99E-23 positive |
| DLAT   | LYRM4-AS1     | 0.396738667 | 4.33E-33 positive |
| DLAT   | HCG18         | 0.328348402 | 1.37E-22 positive |
| PDHB   | ILRUN-AS1     | 0.329066266 | 1.09E-22 positive |
| CDKN2A | NUP153-AS1    | 0.543588735 | 7.81E-66 positive |
| PDHA1  | NUP153-AS1    | 0.366161313 | 4.43E-28 positive |

|        |             |             |                   |
|--------|-------------|-------------|-------------------|
| LIAS   | CASC15      | -0.30771279 | 6.67E-20 negative |
| GLS    | BVES-AS1    | 0.327807854 | 1.62E-22 postive  |
| GLS    | FNDC1-IT1   | 0.359574107 | 4.54E-27 postive  |
| CDKN2A | HDAC2-AS2   | 0.327617898 | 1.72E-22 postive  |
| CDKN2A | CAHM        | 0.397059025 | 3.81E-33 postive  |
| PDHA1  | CAHM        | 0.317526927 | 3.73E-21 postive  |
| DLAT   | HMG3-AS1    | 0.349242843 | 1.57E-25 postive  |
| LIAS   | HMG3-AS1    | -0.30502254 | 1.44E-19 negative |
| PDHA1  | HMG3-AS1    | 0.336778886 | 9.47E-24 postive  |
| GLS    | HMG3-AS1    | 0.300228113 | 5.60E-19 postive  |
| GLS    | LINC01615   | 0.381432175 | 1.62E-30 postive  |
| CDKN2A | FOXP4-AS1   | 0.401424076 | 6.62E-34 postive  |
| PDHA1  | FOXP4-AS1   | 0.40621869  | 9.40E-35 postive  |
| GLS    | FOXP4-AS1   | 0.366065861 | 4.58E-28 postive  |
| PDHA1  | POLH-AS1    | 0.378272468 | 5.31E-30 postive  |
| CDKN2A | ETV7-AS1    | 0.404719374 | 1.74E-34 postive  |
| PDHA1  | ETV7-AS1    | 0.323630472 | 5.87E-22 postive  |
| CDKN2A | LINC02570   | 0.307475208 | 7.14E-20 postive  |
| PDHA1  | LINC02570   | 0.315022171 | 7.87E-21 postive  |
| CDKN2A | SNHG15      | 0.440028342 | 3.86E-41 postive  |
| PDHA1  | SNHG15      | 0.376793052 | 9.21E-30 postive  |
| GLS    | PPP1R9A-AS1 | 0.354837061 | 2.34E-26 postive  |
| DLD    | EMSLR       | 0.379883862 | 2.91E-30 postive  |
| DLAT   | EMSLR       | 0.361272131 | 2.50E-27 postive  |
| CDKN2A | EMSLR       | 0.464129581 | 3.74E-46 postive  |
| PDHA1  | EMSLR       | 0.426395344 | 1.78E-38 postive  |
| GLS    | EMSLR       | 0.313229134 | 1.34E-20 postive  |
| GLS    | DLX6-AS1    | 0.454798659 | 3.64E-44 postive  |
| GLS    | LINC02830   | 0.327046484 | 2.05E-22 postive  |
| DLD    | MKLN1-AS    | 0.335789217 | 1.30E-23 postive  |
| CDKN2A | PAXIP1-AS2  | -0.31257092 | 1.62E-20 negative |
| PDHA1  | PAXIP1-AS2  | -0.36884277 | 1.69E-28 negative |
| PDHA1  | INSIG1-DT   | 0.308050639 | 6.05E-20 postive  |
| PDHA1  | PPP1R35-AS1 | 0.302654096 | 2.83E-19 postive  |
| PDHA1  | NDUFB2-AS1  | 0.328606189 | 1.26E-22 postive  |
| DLD    | REPIN1-AS1  | 0.363792583 | 1.03E-27 postive  |
| LIAS   | LINC00957   | 0.316069642 | 5.76E-21 postive  |
| DLD    | WASL-DT     | 0.320809151 | 1.39E-21 postive  |
| CDKN2A | SNHG26      | 0.42159517  | 1.44E-37 postive  |
| GLS    | SNHG26      | 0.405641731 | 1.19E-34 postive  |
| GLS    | TMEM139-AS1 | 0.312074235 | 1.88E-20 postive  |
| PDHA1  | MAGI2-AS3   | -0.3001568  | 5.71E-19 negative |
| MTF1   | KMT2E-AS1   | -0.35354109 | 3.65E-26 negative |
| PDHA1  | LINC01006   | 0.362268902 | 1.76E-27 postive  |
| CDKN2A | LINC02595   | 0.372036271 | 5.30E-29 postive  |
| GLS    | LINC02595   | 0.343076965 | 1.22E-24 postive  |
| MTF1   | LINC00630   | 0.429198399 | 5.15E-39 postive  |
| CDKN2A | LINC01186   | 0.338797425 | 4.94E-24 postive  |
| CDKN2A | FIRRE       | 0.339933853 | 3.41E-24 postive  |
| GLS    | FIRRE       | 0.308635233 | 5.11E-20 postive  |
| CDKN2A | PLS3-AS1    | 0.332517265 | 3.69E-23 postive  |

|        |               |             |           |          |
|--------|---------------|-------------|-----------|----------|
| GLS    | PLS3-AS1      | 0.389150108 | 8.51E-32  | postive  |
| MTF1   | CH17-340M24.5 | -0.30264532 | 2.83E-19  | negative |
| PDHB   | CH17-340M24.5 | 0.300528152 | 5.14E-19  | postive  |
| MTF1   | MID1IP1-AS1   | 0.30250245  | 2.95E-19  | postive  |
| PDHA1  | XIST          | -0.32302317 | 7.07E-22  | negative |
| PDHB   | JPX           | 0.347405384 | 2.90E-25  | postive  |
| DLAT   | OTUD6B-AS1    | 0.382515278 | 1.08E-30  | postive  |
| CDKN2A | PDE7A-DT      | 0.426989756 | 1.37E-38  | postive  |
| PDHA1  | PDE7A-DT      | 0.404430673 | 1.95E-34  | postive  |
| GLS    | CASC8         | 0.343438299 | 1.08E-24  | postive  |
| PDHA1  | LY6E-DT       | 0.445629904 | 2.86E-42  | postive  |
| GLS    | LINC01301     | 0.347698867 | 2.63E-25  | postive  |
| CDKN2A | CDKN2A-DT     | 0.796187706 | 2.89E-185 | postive  |
| PDHA1  | CDKN2A-DT     | 0.385675364 | 3.24E-31  | postive  |
| CDKN2A | CDKN2B-AS1    | 0.535720339 | 1.21E-63  | postive  |
| CDKN2A | LINC02872     | 0.377722287 | 6.52E-30  | postive  |
| PDHA1  | LINC02872     | 0.308056934 | 6.04E-20  | postive  |
| GLS    | LINC02872     | 0.408375491 | 3.86E-35  | postive  |
| CDKN2A | MIR181A2HG    | 0.323743492 | 5.67E-22  | postive  |
| MTF1   | ARRDC1-AS1    | -0.30362263 | 2.15E-19  | negative |
| CDKN2A | LINC00092     | 0.308348836 | 5.55E-20  | postive  |
| FDX1   | GLIDR         | 0.326206413 | 2.66E-22  | postive  |
| LIAS   | SNHG7         | 0.315138382 | 7.60E-21  | postive  |
| CDKN2A | VLDLR-AS1     | 0.335323106 | 1.51E-23  | postive  |
| PDHA1  | VLDLR-AS1     | 0.38436756  | 5.34E-31  | postive  |
| CDKN2A | FAM27E3       | 0.406320533 | 9.01E-35  | postive  |
| PDHA1  | FAM27E3       | 0.407803118 | 4.90E-35  | postive  |
| MTF1   | TOLLIP-AS1    | -0.30561904 | 1.22E-19  | negative |
| CDKN2A | LINC02721     | 0.393084012 | 1.83E-32  | postive  |
| PDHA1  | LINC02721     | 0.392584932 | 2.23E-32  | postive  |
| GLS    | LINC02721     | 0.330769303 | 6.40E-23  | postive  |
| CDKN2A | LINC02739     | 0.321328532 | 1.19E-21  | postive  |
| DLAT   | USP2-AS1      | 0.366190892 | 4.38E-28  | postive  |
| CDKN2A | USP2-AS1      | 0.355375337 | 1.95E-26  | postive  |
| PDHA1  | USP2-AS1      | 0.379060012 | 3.96E-30  | postive  |
| GLS    | LINC02732     | 0.333852838 | 2.41E-23  | postive  |
| DLAT   | UVRAG-DT      | 0.310254907 | 3.19E-20  | postive  |
| DLAT   | BACE1-AS      | 0.408840767 | 3.19E-35  | postive  |
| PDHA1  | MIR210HG      | 0.373935102 | 2.65E-29  | postive  |
| CDKN2A | SNHG1         | 0.469361634 | 2.69E-47  | postive  |
| PDHA1  | SNHG1         | 0.373577916 | 3.02E-29  | postive  |
| DLAT   | GSEC          | 0.344819228 | 6.86E-25  | postive  |
| PDHA1  | GSEC          | 0.336635063 | 9.92E-24  | postive  |
| PDHA1  | KIRREL3-AS1   | 0.301679618 | 3.72E-19  | postive  |
| GLS    | KIRREL3-AS1   | 0.340111284 | 3.22E-24  | postive  |
| PDHB   | ZBED5-AS1     | 0.395824937 | 6.22E-33  | postive  |
| PDHA1  | TMEM9B-AS1    | -0.31014106 | 3.30E-20  | negative |
| MTF1   | CENATAC-DT    | 0.330699884 | 6.55E-23  | postive  |
| DLAT   | CENATAC-DT    | 0.417315245 | 9.05E-37  | postive  |
| PDHA1  | C11orf72      | 0.376846841 | 9.03E-30  | postive  |
| CDKN2A | PRKCQ-AS1     | 0.408679745 | 3.41E-35  | postive  |

|        |              |             |                   |
|--------|--------------|-------------|-------------------|
| CDKN2A | VIM-AS1      | 0.362715824 | 1.51E-27 postive  |
| PDHA1  | VIM-AS1      | 0.319440337 | 2.10E-21 postive  |
| GLS    | VIM-AS1      | 0.421753013 | 1.35E-37 postive  |
| CDKN2A | RPP38-DT     | 0.403671932 | 2.66E-34 postive  |
| PDHA1  | RPP38-DT     | 0.391819925 | 3.01E-32 postive  |
| CDKN2A | CCNY-AS1     | 0.416613742 | 1.22E-36 postive  |
| CDKN2A | LINC00839    | 0.327792862 | 1.63E-22 postive  |
| GLS    | LINC00839    | 0.313533952 | 1.22E-20 postive  |
| CDKN2A | ZNF22-AS1    | 0.33796044  | 6.47E-24 postive  |
| CDKN2A | SGMS1-AS1    | -0.33805488 | 6.28E-24 negative |
| PDHB   | SGMS1-AS1    | 0.348733183 | 1.86E-25 postive  |
| PDHA1  | SGMS1-AS1    | -0.36661767 | 3.76E-28 negative |
| GLS    | LINC00857    | 0.327118862 | 2.00E-22 postive  |
| MTF1   | LINC00863    | 0.339974491 | 3.37E-24 postive  |
| MTF1   | ENTPD1-AS1   | 0.372246756 | 4.91E-29 postive  |
| FDX1   | EMX2OS       | 0.396201647 | 5.36E-33 postive  |
| CDKN2A | LINC01475    | 0.318874824 | 2.49E-21 postive  |
| GLS    | LINC00601    | 0.321206403 | 1.23E-21 postive  |
| CDKN2A | TLX1NB       | 0.313011795 | 1.42E-20 postive  |
| LIAS   | C10orf95-AS1 | 0.357675484 | 8.79E-27 postive  |
| MTF1   | NEBL-AS1     | -0.31155173 | 2.19E-20 negative |
| PDHA1  | MIR1915HG    | 0.352996727 | 4.39E-26 postive  |
| GLS    | MIR1915HG    | 0.369062675 | 1.56E-28 postive  |
| PDHA1  | SUV39H2-DT   | 0.336969264 | 8.91E-24 postive  |
| CDKN2A | PFKP-DT      | 0.446108042 | 2.29E-42 postive  |
| PDHA1  | PFKP-DT      | 0.345586635 | 5.32E-25 postive  |
| GLS    | PITRM1-AS1   | 0.378793912 | 4.37E-30 postive  |
| GLS    | IDI2-AS1     | 0.307147334 | 7.85E-20 postive  |
| PDHA1  | LINC02652    | 0.341512167 | 2.04E-24 postive  |
| GLS    | LINC02652    | 0.369088957 | 1.55E-28 postive  |
| PDHA1  | WAC-AS1      | 0.33804547  | 6.29E-24 postive  |
| FDX1   | MIR202HG     | 0.849568585 | 2.75E-235 postive |
| CDKN2A | LINC02367    | 0.445246838 | 3.43E-42 postive  |
| CDKN2A | DDX11-AS1    | 0.467048205 | 8.66E-47 postive  |
| PDHA1  | DDX11-AS1    | 0.374177447 | 2.42E-29 postive  |
| PDHB   | BCDIN3D-AS1  | 0.314028887 | 1.06E-20 postive  |
| PDHA1  | POC1B-AS1    | -0.30352956 | 2.21E-19 negative |
| GLS    | LINC00943    | 0.319463422 | 2.08E-21 postive  |
| LIAS   | PXN-AS1      | 0.420825409 | 2.01E-37 postive  |
| CDKN2A | LINC00944    | 0.319488688 | 2.07E-21 postive  |
| GLS    | LINC00944    | 0.302220379 | 3.20E-19 postive  |
| DLAT   | LINC01089    | -0.32331802 | 6.46E-22 negative |
| PDHB   | NRAV         | 0.38865359  | 1.03E-31 postive  |
| PDHB   | ADCY6-DT     | 0.377669948 | 6.65E-30 postive  |
| GLS    | CACNA1C-AS4  | 0.308330133 | 5.58E-20 postive  |
| CDKN2A | LINC00393    | 0.30430896  | 1.77E-19 postive  |
| GLS    | LINC00393    | 0.37970647  | 3.11E-30 postive  |
| DLAT   | LINC01232    | 0.304384909 | 1.73E-19 postive  |
| PDHA1  | LINC01232    | 0.327428862 | 1.82E-22 postive  |
| CDKN2A | MIR17HG      | 0.415728519 | 1.78E-36 postive  |
| PDHA1  | MIR17HG      | 0.328351521 | 1.37E-22 postive  |

|        |             |             |          |          |
|--------|-------------|-------------|----------|----------|
| GLS    | MYO16-AS1   | 0.317401444 | 3.87E-21 | postive  |
| CDKN2A | LMO7-AS1    | 0.349410616 | 1.48E-25 | postive  |
| GLS    | TPT1-AS1    | 0.33478977  | 1.79E-23 | postive  |
| CDKN2A | SPART-AS1   | 0.321993771 | 9.68E-22 | postive  |
| CDKN2A | SNHG10      | 0.333571855 | 2.64E-23 | postive  |
| PDHA1  | SNHG10      | 0.339054505 | 4.54E-24 | postive  |
| CDKN2A | LINC02323   | 0.317909694 | 3.33E-21 | postive  |
| PDHA1  | LINC02323   | 0.3175109   | 3.75E-21 | postive  |
| PDHB   | LINC02332   | 0.311058072 | 2.53E-20 | postive  |
| CDKN2A | LINC00605   | 0.312949281 | 1.45E-20 | postive  |
| LIAS   | DICER1-AS1  | 0.383095337 | 8.66E-31 | postive  |
| GLS    | HIF1A-AS3   | 0.335642059 | 1.36E-23 | postive  |
| PDHA1  | VPS39-DT    | -0.30014531 | 5.73E-19 | negative |
| MTF1   | NPTN-IT1    | 0.353633442 | 3.54E-26 | postive  |
| PDHA1  | NPTN-IT1    | -0.30547378 | 1.27E-19 | negative |
| PDHB   | USP3-AS1    | 0.302136965 | 3.27E-19 | postive  |
| PDHA1  | RAD51-AS1   | -0.32129544 | 1.20E-21 | negative |
| GLS    | LINC01583   | 0.329431219 | 9.75E-23 | postive  |
| FDX1   | LINC01197   | 0.356841465 | 1.17E-26 | postive  |
| GLS    | CARMAL      | 0.378236818 | 5.38E-30 | postive  |
| LIAS   | EIF3J-DT    | 0.339747922 | 3.63E-24 | postive  |
| MTF1   | OIP5-AS1    | 0.338159245 | 6.07E-24 | postive  |
| CDKN2A | SNHG21      | 0.349648525 | 1.37E-25 | postive  |
| PDHA1  | SNHG21      | 0.330110075 | 7.88E-23 | postive  |
| PDHB   | WASIR2      | 0.304281769 | 1.78E-19 | postive  |
| GLS    | CEROX1      | 0.402233078 | 4.78E-34 | postive  |
| PDHA1  | LINC02188   | 0.36872063  | 1.77E-28 | postive  |
| GLS    | LINC02188   | 0.370996678 | 7.75E-29 | postive  |
| CDKN2A | C16orf95-DT | 0.339058015 | 4.54E-24 | postive  |
| PDHA1  | C16orf95-DT | 0.413033709 | 5.54E-36 | postive  |
| GLS    | LINC02189   | 0.389740826 | 6.77E-32 | postive  |
| PDHB   | CD2BP2-DT   | 0.441653936 | 1.82E-41 | postive  |
| CDKN2A | VPS9D1-AS1  | 0.315154475 | 7.56E-21 | postive  |
| PDHA1  | VPS9D1-AS1  | 0.402314634 | 4.62E-34 | postive  |
| GLS    | SRRM2-AS1   | -0.32797849 | 1.53E-22 | negative |
| CDKN2A | SNHG30      | 0.397538898 | 3.15E-33 | postive  |
| PDHA1  | SNHG30      | 0.443222165 | 8.81E-42 | postive  |
| CDKN2A | LINC01563   | 0.305600149 | 1.22E-19 | postive  |
| PDHA1  | LINC01482   | 0.313429174 | 1.26E-20 | postive  |
| GLS    | LINC01482   | 0.315775181 | 6.29E-21 | postive  |
| CDKN2A | LINC00511   | 0.456011396 | 2.03E-44 | postive  |
| PDHA1  | LINC00511   | 0.343021734 | 1.24E-24 | postive  |
| GLS    | LINC00511   | 0.396201715 | 5.36E-33 | postive  |
| GLS    | PRKCA-AS1   | 0.41203862  | 8.41E-36 | postive  |
| FDX1   | C1QTNF1-AS1 | 0.518237155 | 5.55E-59 | postive  |
| CDKN2A | DNAH17-AS1  | 0.480118983 | 1.04E-49 | postive  |
| LIAS   | LINC02693   | -0.30936731 | 4.13E-20 | negative |
| GLS    | LINC02693   | 0.316841112 | 4.58E-21 | postive  |
| GLS    | LINC01152   | 0.423794312 | 5.54E-38 | postive  |
| GLS    | LINC02097   | 0.349218962 | 1.58E-25 | postive  |
| GLS    | ROCR        | 0.366853445 | 3.46E-28 | postive  |

|        |              |             |                   |
|--------|--------------|-------------|-------------------|
| CDKN2A | SOX9-AS1     | 0.363774532 | 1.04E-27 positive |
| PDHA1  | SOX9-AS1     | 0.30065069  | 4.97E-19 positive |
| GLS    | SOX9-AS1     | 0.451918201 | 1.46E-43 positive |
| CDKN2A | LINC01971    | 0.408616563 | 3.50E-35 positive |
| PDHA1  | LINC01971    | 0.323644584 | 5.85E-22 positive |
| GLS    | LINC01971    | 0.301664672 | 3.74E-19 positive |
| PDHB   | LINC00324    | 0.332179437 | 4.11E-23 positive |
| DLAT   | SNHG16       | 0.345698759 | 5.13E-25 positive |
| CDKN2A | ARHGAP28-AS1 | 0.302905372 | 2.63E-19 positive |
| CDKN2A | TYMSOS       | 0.361153372 | 2.61E-27 positive |
| PDHA1  | TYMSOS       | 0.36383941  | 1.01E-27 positive |
| PDHA1  | GATA6-AS1    | 0.331863792 | 4.54E-23 positive |
| CDKN2A | THOC1-DT     | 0.316827541 | 4.60E-21 positive |
| PDHB   | ZNF516-DT    | 0.342878895 | 1.30E-24 positive |
| LIAS   | LINC01927    | 0.302052196 | 3.35E-19 positive |
| CDKN2A | COSMOC       | 0.397372453 | 3.37E-33 positive |
| PDHA1  | COSMOC       | 0.330705373 | 6.53E-23 positive |
| GLS    | LINC01910    | 0.324449127 | 4.57E-22 positive |
| LIAS   | ZNF516-AS1   | 0.319840215 | 1.86E-21 positive |
| GLS    | LINC02837    | 0.397075307 | 3.79E-33 positive |
| PDHB   | PCAT18       | 0.301082538 | 4.40E-19 positive |
| CDKN2A | SNHG17       | 0.352888284 | 4.56E-26 positive |
| PDHA1  | SNHG17       | 0.343319704 | 1.13E-24 positive |
| CDKN2A | PELATON      | 0.351188739 | 8.12E-26 positive |
| PDHA1  | PELATON      | 0.389783882 | 6.65E-32 positive |
| CDKN2A | LINC01273    | 0.319676788 | 1.95E-21 positive |
| DLAT   | LINC01711    | -0.31279052 | 1.52E-20 negative |
| PDHA1  | SLC04A1-AS1  | 0.303886202 | 1.99E-19 positive |
| GLS    | SLC04A1-AS1  | 0.319908415 | 1.82E-21 positive |
| PDHA1  | MHENCRC      | 0.333003274 | 3.16E-23 positive |
| CDKN2A | LINC01842    | 0.30203787  | 3.36E-19 positive |
| LIAS   | LINC00663    | 0.310056852 | 3.38E-20 positive |
| PDHA1  | LINC00663    | -0.32629282 | 2.59E-22 negative |

---
