# Supplementary material for: Comprehensive analysis of cuproptosis-related long non-coding RNA signature and personalized therapeutic strategy of breast cancer patients
Source: PubMed Central journal article supplement (PMC9815178; doi:10.3389/fonc.2022.1081089), 2022-12-22
Supplement: Table_2.pdf [file Table_2.pdf]

The differential expressed lncRNAs

| lncRNA      | logFC        | logCPM      | P-Value   | FDR adjusted P-Value |
|-------------|--------------|-------------|-----------|----------------------|
| LINC02202   | -3.020605527 | 7.276129689 | 1.73E-264 | 5.46E-261            |
| HSD11B1-AS1 | -4.210328511 | 7.117882938 | 1.10E-210 | 1.74E-207            |
| TRHDE-AS1   | -5.303622739 | 9.066609774 | 1.32E-204 | 1.39E-201            |
| LINC01537   | -3.328217228 | 6.441587168 | 1.46E-198 | 1.15E-195            |
| LINC01697   | -4.25589499  | 6.964845612 | 5.71E-194 | 3.61E-191            |
| LINC02884   | -3.523623948 | 5.08684508  | 3.50E-183 | 1.84E-180            |
| LGR4-AS1    | -2.883852104 | 4.821628681 | 5.12E-181 | 2.31E-178            |
| LINC02587   | -3.872149885 | 6.259567873 | 1.31E-180 | 5.18E-178            |
| LINC02237   | -4.950865715 | 4.733621204 | 3.96E-179 | 1.39E-176            |
| CARMN       | -3.27024117  | 9.579025474 | 7.58E-178 | 2.39E-175            |
| ALDH1L1-AS2 | -4.821898848 | 5.869326671 | 1.29E-176 | 3.69E-174            |
| ADAMTS9-AS2 | -2.987672607 | 7.259192497 | 4.73E-176 | 1.24E-173            |
| LINC00968   | -3.646568591 | 7.191919052 | 8.94E-159 | 2.17E-156            |
| MIR133A1HG  | -4.723158135 | 5.941417024 | 3.97E-158 | 8.96E-156            |
| LINC01070   | -4.557604715 | 4.058223221 | 4.92E-149 | 1.04E-146            |
| LINC01230   | -4.453362408 | 6.946487567 | 2.01E-148 | 3.96E-146            |
| LINC02511   | -4.0402198   | 5.09336591  | 8.68E-148 | 1.61E-145            |
| MAGI2-AS3   | -1.968195825 | 10.98563619 | 1.50E-147 | 2.63E-145            |
| LINC00377   | -3.697233815 | 3.468561872 | 6.14E-146 | 1.02E-143            |
| ADIPOQ-AS1  | -4.939962309 | 4.743347423 | 7.28E-146 | 1.15E-143            |
| MESTIT1     | -2.529823846 | 6.308238168 | 7.79E-146 | 1.17E-143            |
| PGM5P3-AS1  | -3.456161834 | 4.094331119 | 1.07E-141 | 1.53E-139            |
| LINC01614   | 5.834025892  | 9.639084465 | 4.74E-136 | 6.51E-134            |
| LINC02185   | -2.617611884 | 5.084099714 | 6.32E-135 | 8.32E-133            |
| LINC01485   | -3.642906157 | 6.682800257 | 5.17E-132 | 6.53E-130            |
| ST3GAL3-AS1 | -3.993600824 | 3.887222139 | 6.06E-131 | 7.36E-129            |
| MIR1-1HG    | -9.868520723 | 6.367280055 | 6.36E-130 | 7.44E-128            |
| LRIG2-DT    | -1.827550955 | 5.963538774 | 2.26E-126 | 2.55E-124            |
| LUARIS      | -2.915806232 | 5.289896965 | 5.36E-126 | 5.84E-124            |
| PGM5P4-AS1  | -3.241390919 | 3.720483709 | 1.67E-124 | 1.76E-122            |
| LINC02082   | -3.579102182 | 3.306959337 | 4.87E-123 | 4.96E-121            |
| KCNIP2-AS1  | -2.02361954  | 5.06402266  | 1.61E-117 | 1.59E-115            |
| MRGPRF-AS1  | -2.836320405 | 3.796736786 | 3.44E-117 | 3.29E-115            |
| PDE9A-AS1   | -2.796845405 | 5.221708024 | 9.53E-117 | 8.85E-115            |
| FGGY-DT     | -4.165792306 | 3.955835363 | 2.43E-116 | 2.19E-114            |
| OXCT1-AS1   | -2.058779777 | 5.833515716 | 5.02E-115 | 4.40E-113            |
| ARHGEF7-AS2 | -2.784240072 | 3.483866867 | 9.28E-112 | 7.92E-110            |
| RBMS3-AS3   | -2.528926409 | 4.691200059 | 9.78E-111 | 8.13E-109            |
| LINC02660   | -3.441155364 | 4.28773226  | 1.16E-109 | 9.38E-108            |
| RHOXF1-AS1  | -3.104207951 | 8.188409444 | 5.74E-109 | 4.53E-107            |
| DAAM2-AS1   | -2.171449657 | 7.310738401 | 1.63E-107 | 1.25E-105            |
| LINC01140   | -2.116810727 | 8.533260088 | 3.28E-105 | 2.47E-103            |
| HID1-AS1    | -1.975445615 | 5.382070566 | 4.18E-105 | 3.07E-103            |
| LM07DN      | -2.819980057 | 3.620118991 | 3.71E-103 | 2.66E-101            |
| RBPMS-AS1   | -1.886352116 | 7.020884868 | 1.03E-102 | 7.20E-101            |
| ADAMTS9-AS1 | -2.664589724 | 7.462386917 | 3.86E-102 | 2.65E-100            |
| PARAL1      | -4.004515477 | 5.592187745 | 4.42E-102 | 2.97E-100            |
| ACTA2-AS1   | -2.307286071 | 9.257269976 | 6.12E-102 | 4.02E-100            |
| LINC00922   | 4.78211877   | 7.279955446 | 5.16E-101 | 3.32E-99             |

|              |               |              |            |           |
|--------------|---------------|--------------|------------|-----------|
| MIR497HG     | -1. 690567379 | 7. 902505122 | 1. 58E-100 | 9. 95E-99 |
| LEF1-AS1     | 2. 56300294   | 5. 919308071 | 3. 22E-99  | 1. 99E-97 |
| MEF2C-AS1    | -2. 063455255 | 5. 82667019  | 2. 85E-98  | 1. 73E-96 |
| LINC01705    | 5. 729688859  | 6. 54062431  | 1. 82E-96  | 1. 08E-94 |
| GAS1RR       | -1. 948427657 | 7. 454113162 | 3. 01E-95  | 1. 76E-93 |
| C6orf99      | 2. 937054118  | 7. 529894297 | 5. 04E-95  | 2. 90E-93 |
| LINC02544    | 3. 922124051  | 8. 62366801  | 4. 10E-93  | 2. 31E-91 |
| CAVIN2-AS1   | -3. 331179779 | 4. 058341601 | 8. 10E-93  | 4. 49E-91 |
| TMEM220-AS1  | -1. 749450916 | 6. 628280299 | 1. 44E-90  | 7. 86E-89 |
| MIR22HG      | -1. 375404687 | 11. 07048109 | 2. 33E-90  | 1. 24E-88 |
| SACS-AS1     | -2. 944357134 | 3. 817858317 | 2. 79E-90  | 1. 47E-88 |
| LINC01942    | -3. 242175098 | 2. 91115156  | 6. 84E-90  | 3. 54E-88 |
| LINC02104    | -2. 331245937 | 4. 816748341 | 1. 22E-89  | 6. 19E-88 |
| LINC00924    | -2. 135553704 | 6. 514083544 | 1. 79E-88  | 8. 99E-87 |
| LINC01586    | -3. 146452223 | 3. 294983075 | 1. 83E-88  | 9. 03E-87 |
| LINC01561    | 4. 929540096  | 6. 020413655 | 9. 91E-88  | 4. 81E-86 |
| C10orf71-AS1 | -7. 003768436 | 3. 53136806  | 4. 60E-87  | 2. 20E-85 |
| LCT-AS1      | 4. 189665603  | 5. 135662803 | 5. 81E-87  | 2. 74E-85 |
| EMX2OS       | -2. 143420053 | 8. 801762597 | 2. 46E-85  | 1. 14E-83 |
| LINC00989    | -1. 976195025 | 5. 202442242 | 3. 60E-85  | 1. 65E-83 |
| FGF13-AS1    | -2. 676508926 | 5. 210618587 | 4. 22E-84  | 1. 90E-82 |
| LM07DN-IT1   | -2. 643175467 | 3. 034580454 | 1. 25E-82  | 5. 55E-81 |
| PRDM16-DT    | -2. 154990347 | 6. 172560424 | 5. 76E-81  | 2. 52E-79 |
| LINC01197    | -1. 755234449 | 7. 290641204 | 1. 04E-80  | 4. 50E-79 |
| LINC01474    | -2. 709209618 | 3. 433712785 | 3. 68E-80  | 1. 57E-78 |
| ZEB2-AS1     | -1. 690630264 | 5. 017822129 | 6. 61E-80  | 2. 78E-78 |
| HORMAD2-AS1  | -2. 479230018 | 4. 227465981 | 3. 47E-79  | 1. 44E-77 |
| PGM5-AS1     | -3. 233798628 | 4. 942059715 | 6. 62E-79  | 2. 71E-77 |
| LINC01091    | -1. 864716607 | 6. 135293909 | 4. 88E-77  | 1. 97E-75 |
| B4GALT1-AS1  | -1. 436707052 | 7. 340976998 | 5. 77E-77  | 2. 31E-75 |
| TMPO-AS1     | 2. 078418733  | 8. 856527855 | 7. 30E-77  | 2. 88E-75 |
| PCAT19       | -1. 473505561 | 9. 644505825 | 3. 89E-76  | 1. 52E-74 |
| FGF14-AS2    | -1. 822846788 | 7. 941720131 | 2. 45E-75  | 9. 45E-74 |
| LINC01985    | -2. 854004254 | 3. 92157406  | 7. 87E-75  | 2. 99E-73 |
| LINC02289    | -1. 897948312 | 5. 942090756 | 1. 35E-74  | 5. 08E-73 |
| RHPN1-AS1    | 2. 134372355  | 9. 600069104 | 1. 06E-73  | 3. 93E-72 |
| LINC02408    | 3. 342254218  | 5. 063117944 | 4. 24E-73  | 1. 56E-71 |
| KCNJ2-AS1    | -1. 839061688 | 6. 545350034 | 1. 26E-72  | 4. 55E-71 |
| TPT1-AS1     | -1. 277965383 | 10. 64568529 | 1. 74E-72  | 6. 26E-71 |
| MIR99AHG     | -1. 725464485 | 9. 189440472 | 3. 32E-72  | 1. 18E-70 |
| LINC01589    | -2. 179650477 | 4. 753795487 | 8. 67E-72  | 3. 04E-70 |
| MME-AS1      | -3. 096494322 | 3. 066394722 | 6. 11E-71  | 2. 12E-69 |
| MAFG-DT      | 2. 04639801   | 10. 27529867 | 2. 47E-70  | 8. 49E-69 |
| LINC02227    | -2. 589511166 | 3. 615131509 | 5. 48E-70  | 1. 86E-68 |
| LINC00671    | -2. 345231747 | 4. 056225088 | 6. 05E-68  | 2. 03E-66 |
| LINC01366    | -1. 84981175  | 4. 109658322 | 6. 51E-68  | 2. 16E-66 |
| CHL1-AS2     | -2. 703989887 | 4. 413238977 | 8. 81E-68  | 2. 90E-66 |
| GNG12-AS1    | -1. 561774682 | 6. 834269589 | 1. 31E-67  | 4. 25E-66 |
| LINC00640    | -2. 154476491 | 5. 211889857 | 1. 79E-67  | 5. 76E-66 |
| RNU6ATAC35P  | -2. 30556448  | 4. 029927861 | 5. 01E-67  | 1. 60E-65 |
| HAND2-AS1    | -1. 679064643 | 7. 412281186 | 6. 04E-66  | 1. 91E-64 |

|             |               |              |           |           |
|-------------|---------------|--------------|-----------|-----------|
| TDRKH-AS1   | 1. 616043908  | 7. 220470627 | 6. 44E-66 | 2. 01E-64 |
| LINC01625   | -2. 740958374 | 4. 602187739 | 2. 49E-65 | 7. 70E-64 |
| MAFTRR      | -1. 806033545 | 5. 617086266 | 4. 86E-65 | 1. 49E-63 |
| LINC00445   | -3. 039447567 | 3. 865453263 | 6. 04E-65 | 1. 83E-63 |
| LINC00337   | 3. 069099717  | 5. 969098554 | 9. 43E-65 | 2. 83E-63 |
| NGF-AS1     | -3. 586956538 | 5. 071115102 | 2. 11E-64 | 6. 27E-63 |
| LINC00641   | -1. 242762096 | 10. 27456237 | 5. 32E-64 | 1. 57E-62 |
| BSG-AS1     | 2. 835807342  | 8. 297086681 | 5. 60E-64 | 1. 64E-62 |
| LGALS8-AS1  | 2. 66537281   | 6. 5160119   | 7. 36E-64 | 2. 13E-62 |
| C9orf163    | 1. 874291598  | 6. 719390747 | 2. 97E-63 | 8. 52E-62 |
| ELF3-AS1    | 1. 65128503   | 7. 872628324 | 5. 69E-63 | 1. 62E-61 |
| MBNL1-AS1   | -1. 551762878 | 9. 248096193 | 8. 49E-63 | 2. 39E-61 |
| LINC02580   | -1. 96234861  | 5. 258895222 | 9. 51E-63 | 2. 66E-61 |
| CADM3-AS1   | -2. 445365844 | 7. 281725477 | 8. 43E-62 | 2. 33E-60 |
| LINC02066   | -3. 163757713 | 2. 896937471 | 8. 55E-62 | 2. 35E-60 |
| PDZRN3-AS1  | -2. 803192114 | 3. 112618037 | 1. 56E-61 | 4. 26E-60 |
| LINC02391   | -1. 624740251 | 5. 161027877 | 1. 88E-61 | 5. 07E-60 |
| LINC00466   | 4. 290975809  | 5. 162577638 | 5. 86E-61 | 1. 57E-59 |
| MIR100HG    | -1. 387735027 | 11. 03917987 | 9. 89E-60 | 2. 62E-58 |
| POLH-AS1    | 1. 701907855  | 6. 783256205 | 1. 22E-59 | 3. 22E-58 |
| PTENP1-AS   | -2. 536369814 | 3. 449010176 | 6. 67E-59 | 1. 74E-57 |
| ZBED3-AS1   | -1. 160716927 | 7. 650933878 | 9. 09E-59 | 2. 35E-57 |
| A2M-AS1     | -1. 138531764 | 7. 736365933 | 1. 30E-58 | 3. 34E-57 |
| CDKN2B-AS1  | 2. 295466941  | 7. 079481244 | 2. 82E-58 | 7. 17E-57 |
| ATP2A1-AS1  | 2. 418094486  | 6. 905652104 | 3. 51E-58 | 8. 87E-57 |
| SCTR-AS1    | -2. 681926176 | 4. 239575895 | 4. 58E-58 | 1. 15E-56 |
| WDR86-AS1   | -1. 992695199 | 7. 323226326 | 9. 29E-58 | 2. 31E-56 |
| LINC01943   | 2. 105170577  | 6. 595356989 | 9. 47E-58 | 2. 34E-56 |
| LINC02881   | -1. 968034656 | 4. 128819376 | 2. 73E-57 | 6. 69E-56 |
| LINC00645   | -3. 975645152 | 3. 912631085 | 4. 29E-57 | 1. 04E-55 |
| WDFY3-AS2   | -1. 195627056 | 8. 76407799  | 5. 06E-57 | 1. 22E-55 |
| LINC01886   | -3. 364380419 | 2. 940614969 | 5. 36E-57 | 1. 28E-55 |
| LINC02766   | -2. 14798855  | 3. 428040928 | 5. 57E-57 | 1. 32E-55 |
| TYMSOS      | 2. 449421927  | 7. 51691209  | 5. 63E-57 | 1. 33E-55 |
| MIR23AHG    | -1. 460117574 | 10. 96620665 | 6. 70E-57 | 1. 57E-55 |
| SNHG26      | -1. 885228285 | 7. 526171617 | 8. 79E-57 | 2. 04E-55 |
| CD2BP2-DT   | 1. 959227314  | 9. 517525361 | 1. 23E-56 | 2. 83E-55 |
| DDX11-AS1   | 1. 754099455  | 7. 233690091 | 2. 17E-56 | 4. 97E-55 |
| LRRRC8C-DT  | -1. 391667082 | 6. 591527709 | 4. 10E-56 | 9. 30E-55 |
| FOXD3-AS1   | 4. 692781669  | 8. 499766282 | 5. 56E-56 | 1. 25E-54 |
| LINC01186   | -2. 835665823 | 4. 289560399 | 1. 05E-55 | 2. 34E-54 |
| LINC01594   | -3. 166643082 | 3. 284407572 | 1. 18E-55 | 2. 62E-54 |
| LINC01352   | -1. 594167963 | 5. 600387016 | 1. 91E-55 | 4. 22E-54 |
| RAPGEF4-AS1 | -2. 35347306  | 3. 398791694 | 2. 02E-55 | 4. 42E-54 |
| AGAP1-IT1   | 2. 760208581  | 6. 432365518 | 2. 88E-55 | 6. 27E-54 |
| GSEC        | 1. 604101618  | 9. 055820032 | 4. 00E-55 | 8. 64E-54 |
| JAZF1-AS1   | -1. 508146423 | 4. 179748685 | 7. 17E-55 | 1. 54E-53 |
| LINC01058   | -1. 607804789 | 4. 591341891 | 9. 99E-55 | 2. 13E-53 |
| STK32A-AS1  | -2. 435038992 | 3. 331504397 | 1. 21E-54 | 2. 57E-53 |
| PCAT6       | 1. 904675319  | 9. 774792564 | 2. 03E-54 | 4. 28E-53 |
| LINC02894   | 1. 943683871  | 8. 851691358 | 2. 93E-54 | 6. 12E-53 |

|             |              |             |          |          |
|-------------|--------------|-------------|----------|----------|
| LINC00906   | -2.73678765  | 3.007126867 | 5.21E-54 | 1.08E-52 |
| MEG3        | -1.568905687 | 11.61454296 | 6.38E-54 | 1.32E-52 |
| LINC01028   | -3.56333003  | 4.467456235 | 6.50E-54 | 1.33E-52 |
| LINC01402   | -1.834590094 | 4.037901282 | 1.44E-53 | 2.92E-52 |
| IL6-AS1     | -2.223633702 | 5.144755622 | 4.13E-53 | 8.35E-52 |
| NDUFB2-AS1  | 1.093995831  | 7.23548409  | 1.26E-52 | 2.53E-51 |
| LINC02172   | -1.977109592 | 3.576419342 | 3.01E-52 | 6.02E-51 |
| LINC00665   | 1.397998662  | 12.5454782  | 3.19E-52 | 6.34E-51 |
| CAPN10-DT   | 1.097776575  | 8.297294093 | 4.84E-52 | 9.55E-51 |
| LINC01929   | 3.75001534   | 8.201128947 | 5.69E-52 | 1.12E-50 |
| ZNF687-AS1  | 1.338450585  | 6.349575642 | 6.50E-52 | 1.27E-50 |
| SOCAR       | 2.426615773  | 4.968514374 | 1.52E-51 | 2.94E-50 |
| LAMA4-AS1   | -1.526528021 | 4.698568653 | 3.86E-51 | 7.43E-50 |
| LINC01405   | -4.746862739 | 5.435600765 | 6.16E-51 | 1.18E-49 |
| CYP2U1-AS1  | -2.040631311 | 3.961838791 | 8.62E-51 | 1.64E-49 |
| LAMC1-AS1   | -1.60761694  | 4.989080387 | 8.89E-51 | 1.68E-49 |
| VLDLR-AS1   | -1.880057479 | 7.138923446 | 1.12E-50 | 2.10E-49 |
| CNTFR-AS1   | -2.895234175 | 3.891245524 | 3.93E-50 | 7.34E-49 |
| ST3GAL1-DT  | 2.077946177  | 7.376387839 | 9.02E-50 | 1.67E-48 |
| DCST1-AS1   | 1.564481919  | 8.671084144 | 1.44E-49 | 2.65E-48 |
| LINC01569   | 1.387544387  | 9.246648168 | 1.60E-49 | 2.94E-48 |
| LINC01429   | 3.570052227  | 4.418860326 | 2.88E-49 | 5.26E-48 |
| LASTR       | 2.664037179  | 5.174028202 | 4.34E-49 | 7.87E-48 |
| LINC00598   | -1.305433482 | 4.569510302 | 5.40E-49 | 9.75E-48 |
| TFAP2A-AS1  | 1.464350097  | 7.689162296 | 6.40E-49 | 1.15E-47 |
| LINC02817   | -1.963113363 | 3.611683467 | 1.29E-48 | 2.31E-47 |
| TONSL-AS1   | 1.732103012  | 5.687222516 | 3.94E-48 | 7.00E-47 |
| DLEU2       | 1.381940525  | 9.240681348 | 7.09E-48 | 1.25E-46 |
| MIR4435-2HG | 1.263989826  | 11.64661985 | 8.45E-48 | 1.48E-46 |
| PRICKLE2-DT | 3.771711434  | 3.561752343 | 1.59E-47 | 2.77E-46 |
| KLHDC7B-DT  | 3.277138718  | 8.193424207 | 1.64E-47 | 2.84E-46 |
| LNCOG       | -1.573085973 | 5.850196326 | 2.20E-47 | 3.79E-46 |
| KLF3-AS1    | -1.234601256 | 7.934435663 | 5.98E-47 | 1.03E-45 |
| C5orf66-AS1 | 6.030357651  | 6.807843005 | 1.74E-46 | 2.96E-45 |
| PVT1        | 1.741799334  | 11.47984134 | 3.33E-46 | 5.61E-45 |
| SOCS3-DT    | 2.294816176  | 6.961032826 | 4.88E-46 | 8.20E-45 |
| TTL10-AS1   | -1.779224996 | 4.23517363  | 6.53E-46 | 1.09E-44 |
| C5orf66     | 1.329132378  | 7.701339981 | 6.84E-46 | 1.14E-44 |
| LINC00511   | 3.082407899  | 9.728535524 | 1.14E-45 | 1.89E-44 |
| LINC00467   | 1.145098895  | 10.90391721 | 1.93E-45 | 3.17E-44 |
| SYNE1-AS1   | -2.040487606 | 2.982769011 | 3.43E-45 | 5.62E-44 |
| SMCR2       | 2.906958355  | 5.010395885 | 6.79E-45 | 1.10E-43 |
| LINC01340   | -2.18564676  | 3.14763836  | 7.51E-45 | 1.22E-43 |
| NRAV        | 1.079491096  | 11.39007409 | 1.70E-44 | 2.74E-43 |
| SENCR       | -1.231066395 | 6.598069742 | 2.63E-44 | 4.21E-43 |
| LINC02086   | 3.819418977  | 5.916845788 | 3.57E-44 | 5.69E-43 |
| KCNIP1-OT1  | -2.22410892  | 3.385974446 | 3.98E-44 | 6.32E-43 |
| FAM87B      | -1.111521511 | 5.119974998 | 4.58E-44 | 7.23E-43 |
| LINC01094   | 1.442843503  | 9.20251935  | 4.73E-44 | 7.44E-43 |
| SRRM2-AS1   | 1.409610847  | 8.498104491 | 5.52E-44 | 8.63E-43 |
| LINC02458   | -1.850778252 | 4.283686086 | 9.20E-44 | 1.43E-42 |

|              |              |             |          |          |
|--------------|--------------|-------------|----------|----------|
| BOK-AS1      | -2.463767157 | 4.59493641  | 1.74E-43 | 2.69E-42 |
| LINC01412    | -2.011093919 | 2.995772886 | 1.78E-43 | 2.75E-42 |
| MIR3150BHG   | 2.802784177  | 6.298433811 | 2.90E-43 | 4.44E-42 |
| LINC01775    | 2.432297242  | 4.360633246 | 3.46E-43 | 5.28E-42 |
| LINC01344    | 3.803028994  | 6.273773888 | 4.72E-43 | 7.16E-42 |
| TBX18-AS1    | -1.792810133 | 3.757737113 | 4.77E-43 | 7.20E-42 |
| RNF139-AS1   | 1.486924448  | 9.063708068 | 1.16E-42 | 1.75E-41 |
| LIPE-AS1     | -1.145056296 | 8.350696171 | 3.52E-42 | 5.26E-41 |
| COL4A2-AS1   | -1.613326162 | 3.868614077 | 8.77E-42 | 1.31E-40 |
| RXYLT1-AS1   | -1.517145407 | 3.675683003 | 2.94E-41 | 4.35E-40 |
| DHCR24-DT    | 1.623680819  | 5.628003414 | 3.52E-41 | 5.20E-40 |
| LINC01854    | -4.875112531 | 3.943433804 | 3.67E-41 | 5.39E-40 |
| SAMD12-AS1   | 1.889409822  | 6.132712493 | 3.80E-41 | 5.55E-40 |
| HOXC-AS3     | 3.732002427  | 7.569974529 | 4.72E-41 | 6.87E-40 |
| LINC00636    | -2.21208914  | 3.463020123 | 4.84E-41 | 7.02E-40 |
| PAPOLA-DT    | 1.349642616  | 6.8774731   | 5.22E-41 | 7.53E-40 |
| LINC01612    | -3.069833518 | 3.950677168 | 5.81E-41 | 8.33E-40 |
| SLC12A5-AS1  | 3.058545625  | 5.631581959 | 6.37E-41 | 9.10E-40 |
| FBXL19-AS1   | 1.535671858  | 9.616439941 | 1.11E-40 | 1.58E-39 |
| PPP1R26-AS1  | 1.261169221  | 9.133026407 | 1.34E-40 | 1.89E-39 |
| CYTOR        | 1.312635513  | 11.12349792 | 1.56E-40 | 2.19E-39 |
| ABCA9-AS1    | -2.102515731 | 3.33554735  | 1.58E-40 | 2.21E-39 |
| HOXA-AS2     | -1.30156772  | 8.303719009 | 2.37E-40 | 3.31E-39 |
| SNHG25       | 2.117821429  | 6.474677152 | 2.60E-40 | 3.62E-39 |
| MAP3K4-AS1   | 1.602901935  | 9.743906888 | 2.71E-40 | 3.75E-39 |
| CERS3-AS1    | -2.356654914 | 3.941272384 | 3.23E-40 | 4.45E-39 |
| ADCY6-DT     | 1.890767751  | 5.493552089 | 3.57E-40 | 4.90E-39 |
| LINC00506    | -1.249486918 | 5.779539464 | 1.02E-39 | 1.38E-38 |
| SCAT2        | 1.446049362  | 5.973237633 | 1.48E-39 | 2.01E-38 |
| LINC01415    | -1.359149914 | 5.828827604 | 1.55E-39 | 2.08E-38 |
| PPP1R14B-AS1 | 1.994285257  | 7.462475921 | 2.26E-39 | 3.02E-38 |
| HOTAIRM1     | -1.307242922 | 8.639173105 | 3.43E-39 | 4.55E-38 |
| NKILA        | 1.532794357  | 9.345011262 | 4.05E-39 | 5.35E-38 |
| LYPLAL1-AS1  | -1.79079041  | 6.048163284 | 4.37E-39 | 5.75E-38 |
| SDK1-AS1     | -1.91675486  | 3.760390304 | 5.31E-39 | 6.96E-38 |
| MIR1-1HG-AS1 | -2.343637202 | 3.727917761 | 6.77E-39 | 8.83E-38 |
| LINC02321    | 2.529709181  | 5.352476674 | 1.28E-38 | 1.67E-37 |
| LINC00484    | -1.865245153 | 4.487001225 | 1.33E-38 | 1.72E-37 |
| LINC02607    | -2.472012553 | 8.13136266  | 1.55E-38 | 2.00E-37 |
| MIR210HG     | 1.806234746  | 8.947885463 | 1.87E-38 | 2.40E-37 |
| LINC01615    | 2.104796073  | 6.789537757 | 3.96E-38 | 5.06E-37 |
| WT1-AS       | 4.855457319  | 7.079824157 | 4.29E-38 | 5.46E-37 |
| RUNDC3A-AS1  | 2.542323552  | 7.673135999 | 5.03E-38 | 6.38E-37 |
| UNQ6494      | 2.027561822  | 5.482219972 | 5.46E-38 | 6.90E-37 |
| COPDA1       | 4.221472582  | 6.768860695 | 8.81E-38 | 1.11E-36 |
| LINC01711    | 1.77302165   | 6.935858591 | 8.99E-38 | 1.13E-36 |
| LMF1-AS1     | -1.392432768 | 4.837820359 | 1.80E-37 | 2.23E-36 |
| CLCA4-AS1    | -1.939946089 | 3.133307146 | 1.86E-37 | 2.31E-36 |
| LINC00702    | -1.373491021 | 8.740947412 | 2.19E-37 | 2.70E-36 |
| HAGLROS      | 2.548820969  | 7.145264041 | 2.51E-37 | 3.08E-36 |
| SUV39H2-DT   | 1.287409328  | 7.098795559 | 3.16E-37 | 3.86E-36 |

|               |              |             |          |          |
|---------------|--------------|-------------|----------|----------|
| LINC01354     | -1.74973721  | 6.976469603 | 3.35E-37 | 4.08E-36 |
| LINC02599     | -1.463885329 | 4.378063885 | 5.44E-37 | 6.59E-36 |
| LINC02256     | -1.08811205  | 5.63432679  | 5.84E-37 | 7.04E-36 |
| ZNF252P-AS1   | 1.35630065   | 6.107820886 | 6.92E-37 | 8.31E-36 |
| LINC01522     | 5.500595978  | 6.978202206 | 7.10E-37 | 8.50E-36 |
| LINC01908     | -2.173578027 | 3.351404213 | 7.57E-37 | 9.01E-36 |
| LINC01894     | -1.837440478 | 4.44711285  | 9.72E-37 | 1.15E-35 |
| PPP2CA-DT     | 1.363244765  | 7.301536657 | 9.96E-37 | 1.17E-35 |
| LINC01359     | -1.352794711 | 6.341508371 | 1.07E-36 | 1.25E-35 |
| POU2F1-DT     | 1.702363456  | 5.108858494 | 1.64E-36 | 1.91E-35 |
| LINC00460     | 2.928923102  | 5.831795826 | 2.26E-36 | 2.62E-35 |
| TMEM14B-DT    | 1.077093782  | 6.3908228   | 2.77E-36 | 3.20E-35 |
| C1orf220      | 1.440648634  | 7.353950074 | 4.47E-36 | 5.15E-35 |
| CHL1-AS1      | -2.267607937 | 3.160555647 | 7.66E-36 | 8.76E-35 |
| LINC01588     | 1.803019915  | 9.197439363 | 1.01E-35 | 1.16E-34 |
| SLC14A2-AS1   | -1.96307906  | 4.425153702 | 1.67E-35 | 1.88E-34 |
| HOXA-AS3      | -1.670628564 | 6.192216079 | 1.72E-35 | 1.93E-34 |
| CCND2-AS1     | -1.565795126 | 3.331854223 | 1.96E-35 | 2.20E-34 |
| IER3-AS1      | 1.614427109  | 5.6932584   | 2.30E-35 | 2.57E-34 |
| LINC01136     | 2.050830257  | 5.68740975  | 2.46E-35 | 2.75E-34 |
| TENM3-AS1     | -1.821417252 | 7.032221968 | 3.00E-35 | 3.33E-34 |
| LINC01088     | -1.797526922 | 6.882634918 | 5.04E-35 | 5.58E-34 |
| LINC01117     | 2.228891746  | 7.223348022 | 5.33E-35 | 5.88E-34 |
| GASAL1        | 1.294839403  | 7.622656667 | 6.70E-35 | 7.37E-34 |
| CCDC183-AS1   | 1.335776126  | 8.994306071 | 9.33E-35 | 1.02E-33 |
| LINC02541     | -1.541843764 | 5.370586529 | 1.40E-34 | 1.53E-33 |
| PYCARD-AS1    | 1.943594432  | 4.616010028 | 1.41E-34 | 1.53E-33 |
| LINC01281     | 3.581624788  | 5.012831678 | 1.56E-34 | 1.69E-33 |
| CSGALNACT2-DT | 1.028962205  | 6.24824483  | 1.78E-34 | 1.92E-33 |
| ZKSCAN2-DT    | 1.007058472  | 8.61701056  | 2.24E-34 | 2.41E-33 |
| CHKB-DT       | 1.284149049  | 6.912426957 | 2.34E-34 | 2.51E-33 |
| MRPL20-DT     | 1.220295939  | 8.658103567 | 2.71E-34 | 2.90E-33 |
| C15orf54      | 3.206770246  | 4.973407981 | 2.86E-34 | 3.05E-33 |
| LINC01484     | -1.935426526 | 5.463930385 | 3.90E-34 | 4.14E-33 |
| ARHGAP29-AS1  | 3.430810236  | 6.67940317  | 4.77E-34 | 5.05E-33 |
| FAM83C-AS1    | 2.472392717  | 3.598620978 | 6.96E-34 | 7.35E-33 |
| LINC00536     | 2.891336495  | 7.079045782 | 1.32E-33 | 1.39E-32 |
| GHET1         | 1.274905591  | 6.794321778 | 1.44E-33 | 1.52E-32 |
| SMAD9-IT1     | -1.517957303 | 3.334516211 | 1.67E-33 | 1.75E-32 |
| MIR200CHG     | 1.539333025  | 9.077164221 | 1.79E-33 | 1.87E-32 |
| TLX1NB        | 5.638105346  | 4.788130507 | 1.84E-33 | 1.91E-32 |
| LINC02716     | -1.701357753 | 5.132345622 | 1.85E-33 | 1.92E-32 |
| STAM-AS1      | 1.301631057  | 5.81164031  | 2.21E-33 | 2.28E-32 |
| EIPR1-IT1     | 2.155076642  | 5.110454844 | 2.50E-33 | 2.55E-32 |
| LINC01267     | -1.723452926 | 3.663316228 | 3.48E-33 | 3.54E-32 |
| LINC01978     | 2.353940661  | 5.203554345 | 3.97E-33 | 4.03E-32 |
| MIAT          | 1.823952596  | 10.07435242 | 4.13E-33 | 4.18E-32 |
| KCNH1-IT1     | 4.149193537  | 5.399489652 | 4.99E-33 | 5.04E-32 |
| LINC00115     | 1.046457534  | 6.571969471 | 1.21E-32 | 1.22E-31 |
| LINC02685     | 3.06346206   | 3.563850332 | 1.77E-32 | 1.77E-31 |
| EMSLR         | 1.883717921  | 8.375048821 | 2.01E-32 | 2.01E-31 |

|                |               |              |           |           |
|----------------|---------------|--------------|-----------|-----------|
| LINC00940      | 2. 682327587  | 7. 633755845 | 2. 48E-32 | 2. 47E-31 |
| DGUOK-AS1      | 1. 160976373  | 7. 837489469 | 2. 90E-32 | 2. 88E-31 |
| FLJ12825       | 2. 30744912   | 7. 753508117 | 3. 81E-32 | 3. 77E-31 |
| LINC01224      | 3. 984453188  | 7. 653133375 | 3. 89E-32 | 3. 83E-31 |
| LINC01532      | -2. 342711472 | 3. 14419869  | 3. 90E-32 | 3. 84E-31 |
| LINC02489      | 3. 764320572  | 5. 515077505 | 4. 39E-32 | 4. 31E-31 |
| CIRBP-AS1      | 1. 049235279  | 7. 375163502 | 5. 00E-32 | 4. 89E-31 |
| LINC01977      | 2. 162923207  | 8. 997220636 | 5. 19E-32 | 5. 05E-31 |
| GEMIN7-AS1     | 1. 05309337   | 6. 905433595 | 5. 51E-32 | 5. 36E-31 |
| LINC00243      | 2. 167832285  | 6. 813350972 | 5. 83E-32 | 5. 63E-31 |
| LINC01842      | 3. 38676815   | 5. 939403952 | 6. 40E-32 | 6. 15E-31 |
| ARHGEF2-AS2    | 1. 268572674  | 6. 927489908 | 6. 41E-32 | 6. 15E-31 |
| LINC02352      | -1. 229276439 | 6. 080330673 | 6. 55E-32 | 6. 27E-31 |
| LBX2-AS1       | 1. 19467032   | 10. 36475093 | 7. 44E-32 | 7. 09E-31 |
| SFTA1P         | -1. 487018021 | 5. 87550098  | 8. 69E-32 | 8. 27E-31 |
| LINC02139      | -1. 309243637 | 3. 984189461 | 9. 48E-32 | 8. 99E-31 |
| HLX-AS1        | -1. 435508773 | 3. 99298142  | 9. 90E-32 | 9. 36E-31 |
| LYPLAL1-DT     | -1. 203331847 | 4. 901038856 | 1. 10E-31 | 1. 03E-30 |
| LINC02388      | -1. 929070546 | 3. 282653145 | 1. 66E-31 | 1. 56E-30 |
| CRIM1-DT       | -1. 125762274 | 7. 800036694 | 1. 69E-31 | 1. 58E-30 |
| MAFA-AS1       | 3. 77747678   | 4. 448479645 | 2. 31E-31 | 2. 16E-30 |
| CH17-340M24. 3 | 1. 077483736  | 9. 722007808 | 2. 33E-31 | 2. 17E-30 |
| LINC02878      | 1. 299120586  | 6. 857062566 | 2. 89E-31 | 2. 68E-30 |
| CERS6-AS1      | 1. 864654896  | 4. 446399119 | 3. 58E-31 | 3. 32E-30 |
| SNHG3          | 1. 211564325  | 11. 67373282 | 6. 21E-31 | 5. 73E-30 |
| PLA2G4C-AS1    | 2. 170697221  | 4. 897905129 | 6. 83E-31 | 6. 29E-30 |
| GATA3-AS1      | 2. 816319974  | 10. 50339763 | 1. 01E-30 | 9. 27E-30 |
| DLG3-AS1       | 2. 023457043  | 5. 168393904 | 1. 08E-30 | 9. 84E-30 |
| RCCD1-AS1      | 1. 125690719  | 5. 166182385 | 1. 17E-30 | 1. 07E-29 |
| LINC02891      | -1. 369992698 | 3. 530324729 | 1. 30E-30 | 1. 18E-29 |
| FZD4-DT        | -1. 074057451 | 6. 597226883 | 1. 48E-30 | 1. 35E-29 |
| LINC01152      | -2. 131804583 | 8. 69396535  | 1. 80E-30 | 1. 63E-29 |
| LINC01238      | 3. 527293562  | 11. 39845276 | 1. 84E-30 | 1. 66E-29 |
| APCDD1L-DT     | -1. 961707288 | 8. 502169434 | 1. 88E-30 | 1. 69E-29 |
| HOTAIR         | 3. 075667597  | 10. 0733425  | 1. 92E-30 | 1. 72E-29 |
| FLG-AS1        | -1. 238948815 | 6. 532488372 | 2. 39E-30 | 2. 13E-29 |
| LINC02613      | -1. 887889331 | 9. 025439043 | 2. 44E-30 | 2. 17E-29 |
| HPN-AS1        | 1. 699783015  | 5. 330765605 | 2. 66E-30 | 2. 36E-29 |
| SLC9A3R1-AS1   | 2. 033517863  | 9. 202028999 | 3. 47E-30 | 3. 07E-29 |
| CLRN1-AS1      | 3. 062802064  | 4. 957674913 | 4. 18E-30 | 3. 67E-29 |
| LINC01703      | 1. 393765905  | 7. 342856294 | 4. 34E-30 | 3. 79E-29 |
| MEG8           | -1. 424235652 | 4. 014895686 | 6. 46E-30 | 5. 64E-29 |
| LINC02804      | 1. 91472169   | 4. 946759067 | 7. 36E-30 | 6. 41E-29 |
| LINC02528      | 3. 233504388  | 4. 377571725 | 8. 01E-30 | 6. 93E-29 |
| TP53RK-DT      | 1. 403985478  | 5. 742414474 | 8. 38E-30 | 7. 23E-29 |
| LINC01747      | 1. 865011372  | 3. 704045563 | 8. 54E-30 | 7. 35E-29 |
| NARF-AS1       | 1. 684997906  | 4. 133684876 | 9. 24E-30 | 7. 93E-29 |
| LINC01624      | -1. 249441809 | 4. 14928972  | 9. 53E-30 | 8. 15E-29 |
| THOC1-DT       | 1. 197660129  | 5. 346060724 | 9. 77E-30 | 8. 33E-29 |
| BVES-AS1       | -1. 666629638 | 4. 656885951 | 1. 01E-29 | 8. 61E-29 |
| TP73-AS3       | 3. 148633325  | 3. 648812276 | 1. 02E-29 | 8. 68E-29 |

|             |               |              |           |           |
|-------------|---------------|--------------|-----------|-----------|
| GORAB-AS1   | 1. 606440882  | 6. 908492068 | 1. 54E-29 | 1. 30E-28 |
| OTULIN-DT   | 1. 167592679  | 6. 066641789 | 1. 66E-29 | 1. 40E-28 |
| LINC02166   | 1. 090000216  | 5. 903581286 | 1. 88E-29 | 1. 58E-28 |
| TEX26-AS1   | -1. 737033184 | 4. 664439795 | 2. 10E-29 | 1. 75E-28 |
| LINC01063   | 1. 644759011  | 5. 040055758 | 2. 17E-29 | 1. 80E-28 |
| MNX1-AS1    | 3. 189741332  | 7. 72982881  | 2. 27E-29 | 1. 88E-28 |
| LINC01497   | -2. 783285058 | 4. 429276849 | 2. 65E-29 | 2. 19E-28 |
| BRWD1-AS2   | 1. 14824554   | 6. 810584882 | 3. 62E-29 | 2. 99E-28 |
| LINC02762   | -1. 148806987 | 8. 084894841 | 4. 99E-29 | 4. 10E-28 |
| LMNTD2-AS1  | 2. 003926633  | 9. 344642558 | 5. 53E-29 | 4. 54E-28 |
| TPRG1-AS1   | -1. 344481657 | 6. 638860139 | 8. 11E-29 | 6. 63E-28 |
| UST-AS2     | 1. 917472054  | 3. 802984023 | 1. 19E-28 | 9. 68E-28 |
| CBR3-AS1    | 1. 138568323  | 9. 765914532 | 1. 42E-28 | 1. 15E-27 |
| WASIR2      | 2. 115952569  | 7. 1340079   | 1. 93E-28 | 1. 56E-27 |
| LINC00853   | 1. 300501055  | 7. 060831258 | 2. 74E-28 | 2. 19E-27 |
| UNC5B-AS1   | 1. 954352459  | 5. 780744369 | 3. 22E-28 | 2. 57E-27 |
| LINC00607   | 1. 873019116  | 7. 619818097 | 3. 36E-28 | 2. 68E-27 |
| MYHAS       | -1. 340098408 | 5. 230850219 | 3. 52E-28 | 2. 80E-27 |
| FUT8-AS1    | 1. 909516686  | 7. 149315379 | 5. 40E-28 | 4. 27E-27 |
| MIR193BHG   | -1. 045180123 | 7. 179250009 | 5. 92E-28 | 4. 67E-27 |
| LINC00920   | -1. 156623716 | 7. 668761234 | 7. 32E-28 | 5. 77E-27 |
| DEPDC1-AS1  | 2. 744228332  | 3. 733720223 | 7. 77E-28 | 6. 10E-27 |
| GAPLINC     | 1. 137789534  | 6. 803890011 | 8. 11E-28 | 6. 36E-27 |
| TSBP1-AS1   | -1. 406378273 | 3. 418117287 | 8. 32E-28 | 6. 50E-27 |
| LINC02798   | -1. 283609453 | 6. 158170478 | 8. 35E-28 | 6. 51E-27 |
| MGAT3-AS1   | -1. 872735417 | 3. 569728477 | 8. 99E-28 | 6. 99E-27 |
| ZNF132-DT   | 1. 284990605  | 6. 67694021  | 1. 08E-27 | 8. 36E-27 |
| LINC02739   | -1. 215413247 | 3. 61032888  | 1. 25E-27 | 9. 67E-27 |
| KLHL30-AS1  | -2. 166044673 | 3. 466909892 | 1. 68E-27 | 1. 30E-26 |
| ST8SIA6-AS1 | 3. 294276678  | 9. 791047107 | 1. 92E-27 | 1. 47E-26 |
| MRPS30-DT   | 3. 340667075  | 12. 0032183  | 2. 12E-27 | 1. 63E-26 |
| MEG9        | -1. 324906257 | 4. 954819708 | 2. 56E-27 | 1. 96E-26 |
| LINC02593   | 2. 509486146  | 9. 61586175  | 2. 95E-27 | 2. 24E-26 |
| LINC00884   | 1. 401999906  | 8. 261987593 | 3. 43E-27 | 2. 60E-26 |
| RALGPS2-AS1 | 1. 600409775  | 6. 440078117 | 3. 47E-27 | 2. 62E-26 |
| HOXB-AS1    | -1. 234585518 | 8. 958405076 | 3. 88E-27 | 2. 92E-26 |
| LINC02676   | 4. 072303049  | 3. 513188153 | 3. 90E-27 | 2. 93E-26 |
| TBILA       | 1. 762852603  | 8. 404005597 | 3. 98E-27 | 2. 99E-26 |
| LINC02012   | 1. 507557656  | 6. 399364397 | 4. 33E-27 | 3. 24E-26 |
| SMYD3-AS1   | 3. 598745676  | 4. 801258932 | 4. 99E-27 | 3. 73E-26 |
| UBE2Q1-AS1  | 1. 301159346  | 4. 637994385 | 5. 21E-27 | 3. 88E-26 |
| KRTAP5-AS1  | 1. 933209284  | 8. 131795198 | 5. 25E-27 | 3. 90E-26 |
| LINC01505   | 3. 013339851  | 5. 063987188 | 6. 02E-27 | 4. 46E-26 |
| LINC02747   | 3. 895875141  | 9. 534563232 | 7. 09E-27 | 5. 24E-26 |
| LINC02847   | -1. 528539122 | 3. 083903754 | 7. 29E-27 | 5. 38E-26 |
| LINC00211   | -1. 339462216 | 3. 576884436 | 7. 48E-27 | 5. 51E-26 |
| ATXN7L3-AS1 | 1. 114986674  | 5. 244772011 | 7. 59E-27 | 5. 57E-26 |
| HDAC11-AS1  | 1. 822103459  | 3. 690704654 | 9. 22E-27 | 6. 73E-26 |
| LINC02712   | -1. 667154987 | 4. 749518559 | 1. 17E-26 | 8. 52E-26 |
| C9orf106    | 1. 83279973   | 6. 811366066 | 1. 19E-26 | 8. 63E-26 |
| DNAH100S    | 1. 370882527  | 9. 431468352 | 1. 55E-26 | 1. 12E-25 |

|             |               |              |           |           |
|-------------|---------------|--------------|-----------|-----------|
| LINC02771   | 2. 559213444  | 4. 316010507 | 1. 55E-26 | 1. 12E-25 |
| LINC02195   | 2. 619819502  | 4. 078145118 | 1. 61E-26 | 1. 15E-25 |
| JARID2-DT   | 1. 334297436  | 6. 37894499  | 2. 25E-26 | 1. 62E-25 |
| DSCAM-AS1   | 5. 964686411  | 11. 09888458 | 2. 65E-26 | 1. 90E-25 |
| FRG1-DT     | -1. 187308497 | 6. 278568277 | 3. 22E-26 | 2. 29E-25 |
| CASC16      | 4. 161403794  | 6. 836024323 | 4. 58E-26 | 3. 26E-25 |
| PCAT7       | 2. 075378188  | 6. 899473224 | 5. 88E-26 | 4. 16E-25 |
| PROX1-AS1   | -1. 830028889 | 4. 512548968 | 6. 58E-26 | 4. 65E-25 |
| SH3TC2-DT   | -1. 700345613 | 3. 147444113 | 7. 39E-26 | 5. 21E-25 |
| LINC01644   | 3. 954952229  | 7. 274046438 | 7. 42E-26 | 5. 22E-25 |
| RFX5-AS1    | 1. 177427679  | 6. 1688381   | 7. 49E-26 | 5. 26E-25 |
| ELFN1-AS1   | 4. 590711193  | 7. 053310378 | 8. 72E-26 | 6. 09E-25 |
| GRASLND     | 1. 438433909  | 7. 861402798 | 9. 12E-26 | 6. 35E-25 |
| DIO3OS      | -1. 499913424 | 8. 058497701 | 9. 60E-26 | 6. 68E-25 |
| AFAP1-AS1   | 3. 935848242  | 9. 711631097 | 1. 16E-25 | 8. 03E-25 |
| THBS3-AS1   | 1. 17262699   | 8. 138203403 | 1. 64E-25 | 1. 13E-24 |
| DNAAF3-AS1  | 2. 465200646  | 3. 468124935 | 1. 70E-25 | 1. 16E-24 |
| DPY19L3-DT  | 1. 188152412  | 6. 659289872 | 1. 75E-25 | 1. 20E-24 |
| LINC02870   | 2. 368259125  | 5. 586420813 | 2. 38E-25 | 1. 62E-24 |
| BMPR1B-DT   | 4. 54029487   | 7. 418796795 | 2. 77E-25 | 1. 88E-24 |
| FIGNL2-DT   | -1. 460599188 | 3. 512880481 | 4. 05E-25 | 2. 75E-24 |
| LINC00670   | -1. 869454892 | 2. 989706871 | 5. 07E-25 | 3. 42E-24 |
| SCAT1       | 1. 810081875  | 4. 269558642 | 5. 24E-25 | 3. 52E-24 |
| DPYD-AS1    | -1. 680742241 | 3. 21031872  | 5. 51E-25 | 3. 70E-24 |
| LINC01116   | 1. 567344671  | 10. 81460574 | 5. 79E-25 | 3. 88E-24 |
| THBS1-IT1   | 1. 832766771  | 8. 329000767 | 5. 92E-25 | 3. 96E-24 |
| EHD4-AS1    | -1. 160224635 | 4. 413574155 | 6. 28E-25 | 4. 19E-24 |
| LINC01096   | 2. 60788595   | 5. 164767604 | 7. 71E-25 | 5. 13E-24 |
| HS1BP3-IT1  | -1. 118375904 | 4. 107054955 | 1. 00E-24 | 6. 68E-24 |
| LINC02623   | -1. 839327931 | 3. 218124049 | 1. 04E-24 | 6. 87E-24 |
| PHEX-AS1    | -2. 318139502 | 3. 462986541 | 1. 20E-24 | 7. 91E-24 |
| MAL2-AS1    | 1. 622247599  | 5. 085383696 | 1. 77E-24 | 1. 16E-23 |
| FALEC       | 1. 282068634  | 5. 143034453 | 2. 18E-24 | 1. 43E-23 |
| LINC01213   | 2. 155195813  | 5. 542890417 | 2. 37E-24 | 1. 55E-23 |
| SPACA6P-AS  | 1. 427003697  | 5. 552907672 | 2. 58E-24 | 1. 68E-23 |
| SNHG9       | 1. 224967553  | 9. 502067809 | 3. 69E-24 | 2. 39E-23 |
| YTHDF3-DT   | 1. 225051083  | 7. 511081029 | 3. 95E-24 | 2. 55E-23 |
| ST6GAL2-IT1 | 2. 14593958   | 3. 594603395 | 4. 23E-24 | 2. 72E-23 |
| SEPTIN9-DT  | 2. 055743135  | 4. 35100689  | 4. 62E-24 | 2. 97E-23 |
| POT1-AS1    | 1. 118139968  | 7. 254525059 | 4. 74E-24 | 3. 04E-23 |
| LINC01050   | 2. 633445446  | 4. 230765091 | 4. 83E-24 | 3. 09E-23 |
| DYRK3-AS1   | 1. 482790642  | 4. 562057852 | 5. 68E-24 | 3. 63E-23 |
| THBS1-AS1   | 2. 640650737  | 9. 892111424 | 5. 92E-24 | 3. 78E-23 |
| LINC01264   | 2. 488546959  | 3. 696378427 | 6. 82E-24 | 4. 33E-23 |
| MMP2-AS1    | 1. 803940669  | 6. 545602458 | 7. 41E-24 | 4. 70E-23 |
| USP30-AS1   | 1. 596175614  | 6. 610879989 | 8. 01E-24 | 5. 07E-23 |
| MIR924HG    | 1. 663835755  | 7. 780473812 | 8. 58E-24 | 5. 42E-23 |
| RNF157-AS1  | 1. 480059658  | 6. 49018876  | 9. 49E-24 | 5. 98E-23 |
| DDX3ILA1    | 3. 367366821  | 4. 936688423 | 1. 34E-23 | 8. 42E-23 |
| LINC02888   | 4. 501909638  | 6. 652596426 | 1. 42E-23 | 8. 89E-23 |
| LINC02806   | 2. 448499118  | 4. 436774823 | 1. 59E-23 | 9. 91E-23 |

|              |               |              |           |           |
|--------------|---------------|--------------|-----------|-----------|
| SIAH2-AS1    | 1. 641290476  | 6. 281068327 | 1. 83E-23 | 1. 13E-22 |
| LINC02280    | 2. 146340681  | 5. 222341652 | 1. 85E-23 | 1. 15E-22 |
| LINC01649    | 2. 809693374  | 4. 36214246  | 1. 86E-23 | 1. 15E-22 |
| FOXD2-AS1    | 1. 104452879  | 8. 641436938 | 1. 92E-23 | 1. 18E-22 |
| LINC01857    | 1. 834626476  | 6. 273082577 | 1. 93E-23 | 1. 19E-22 |
| LINC02288    | -1. 023567361 | 4. 903905197 | 2. 45E-23 | 1. 50E-22 |
| LINC02620    | 3. 481808525  | 7. 419624744 | 2. 58E-23 | 1. 58E-22 |
| LINC00840    | -1. 186779117 | 5. 886961349 | 2. 64E-23 | 1. 62E-22 |
| HEATR6-DT    | 1. 164673134  | 5. 514150963 | 3. 18E-23 | 1. 93E-22 |
| ABALON       | 1. 084685475  | 6. 381813531 | 3. 38E-23 | 2. 05E-22 |
| TIMMDC1-DT   | 1. 632183486  | 4. 014020063 | 3. 93E-23 | 2. 38E-22 |
| DNAH17-AS1   | 3. 02329014   | 4. 907200494 | 5. 42E-23 | 3. 27E-22 |
| LINC01422    | -1. 026484212 | 5. 779188825 | 6. 36E-23 | 3. 82E-22 |
| LINC02236    | 1. 928125373  | 3. 779713586 | 6. 55E-23 | 3. 93E-22 |
| SIRLNT       | 7. 176124228  | 9. 781659153 | 8. 98E-23 | 5. 38E-22 |
| LINC02006    | -1. 577443021 | 4. 535924861 | 9. 82E-23 | 5. 87E-22 |
| LINC02416    | 2. 544628605  | 3. 880759783 | 1. 07E-22 | 6. 41E-22 |
| LINC02846    | 1. 358794188  | 5. 631785568 | 1. 68E-22 | 1. 00E-21 |
| EHMT2-AS1    | 1. 593465466  | 4. 11096244  | 1. 93E-22 | 1. 14E-21 |
| C1orf21-DT   | 1. 302849735  | 6. 051669582 | 2. 11E-22 | 1. 25E-21 |
| LY86-AS1     | -1. 300699802 | 4. 485689036 | 2. 36E-22 | 1. 40E-21 |
| LINC01426    | 1. 439219997  | 7. 91254525  | 2. 50E-22 | 1. 47E-21 |
| ZNF350-AS1   | 2. 408422754  | 7. 654511378 | 2. 56E-22 | 1. 51E-21 |
| LINC00578    | 2. 555453083  | 8. 042351544 | 2. 81E-22 | 1. 65E-21 |
| BCAR4        | 4. 844662413  | 6. 002046745 | 2. 90E-22 | 1. 70E-21 |
| MIR155HG     | 1. 389700308  | 7. 629918627 | 3. 65E-22 | 2. 14E-21 |
| SSTR5-AS1    | 5. 586351279  | 5. 706310931 | 3. 99E-22 | 2. 33E-21 |
| CYP4A22-AS1  | 1. 149023925  | 5. 396695663 | 4. 18E-22 | 2. 44E-21 |
| LINC02201    | 2. 535829822  | 3. 684137037 | 4. 49E-22 | 2. 61E-21 |
| TWSG1-DT     | 1. 352232089  | 5. 255141756 | 5. 67E-22 | 3. 29E-21 |
| DSCR8        | 5. 53161826   | 6. 021543164 | 6. 52E-22 | 3. 78E-21 |
| LINC00160    | 1. 945022371  | 7. 380366688 | 8. 58E-22 | 4. 96E-21 |
| CD2AP-DT     | 1. 147016378  | 6. 437544701 | 8. 94E-22 | 5. 16E-21 |
| LINC02257    | 1. 977786484  | 5. 344127865 | 1. 24E-21 | 7. 12E-21 |
| ARHGEF26-AS1 | 1. 527608089  | 8. 431724934 | 1. 24E-21 | 7. 12E-21 |
| B3GAT1-DT    | -2. 049276541 | 6. 563324944 | 1. 53E-21 | 8. 74E-21 |
| SRGAP3-AS2   | 4. 632537465  | 5. 37802278  | 1. 63E-21 | 9. 30E-21 |
| LINC00870    | 1. 836552791  | 4. 557886701 | 1. 64E-21 | 9. 37E-21 |
| DSCR9        | 1. 253983261  | 4. 806786286 | 2. 17E-21 | 1. 24E-20 |
| LINC02889    | 2. 695576743  | 5. 838909923 | 2. 76E-21 | 1. 57E-20 |
| LINC02224    | 4. 608123712  | 9. 019725553 | 3. 38E-21 | 1. 90E-20 |
| TCL6         | 2. 808021216  | 6. 086725985 | 3. 50E-21 | 1. 97E-20 |
| PCOTH        | 1. 441665518  | 6. 377475783 | 3. 57E-21 | 2. 00E-20 |
| STK4-AS1     | 1. 133911814  | 6. 310863081 | 4. 09E-21 | 2. 29E-20 |
| LINC00659    | 3. 702527357  | 4. 140873418 | 4. 77E-21 | 2. 66E-20 |
| LINC00628    | 1. 861875381  | 4. 239287847 | 5. 13E-21 | 2. 85E-20 |
| FNDC1-IT1    | 2. 343793112  | 4. 120663196 | 5. 18E-21 | 2. 87E-20 |
| LINC02026    | 1. 32056479   | 4. 930257245 | 5. 26E-21 | 2. 92E-20 |
| UBE2E2-AS1   | -1. 462286639 | 2. 997904393 | 7. 05E-21 | 3. 89E-20 |
| LINC01572    | 1. 115237712  | 5. 558546004 | 7. 13E-21 | 3. 93E-20 |
| DNAH8-AS1    | 2. 638874848  | 3. 062873294 | 7. 37E-21 | 4. 05E-20 |

|                |               |              |           |           |
|----------------|---------------|--------------|-----------|-----------|
| LINC02867      | 1. 693625943  | 4. 600938923 | 8. 23E-21 | 4. 51E-20 |
| LINC01605      | 1. 814069034  | 7. 567876761 | 8. 50E-21 | 4. 65E-20 |
| DHX35-DT       | 1. 7350044    | 4. 027924376 | 8. 69E-21 | 4. 75E-20 |
| LINC01814      | 1. 45585473   | 7. 565565644 | 8. 76E-21 | 4. 78E-20 |
| LINC00052      | 6. 211671922  | 9. 845109892 | 9. 55E-21 | 5. 20E-20 |
| LINC02827      | 1. 349862473  | 5. 905435012 | 1. 07E-20 | 5. 83E-20 |
| LINC01341      | 1. 349062626  | 7. 86188604  | 1. 24E-20 | 6. 73E-20 |
| TMEM75         | 2. 185290458  | 4. 988078829 | 1. 28E-20 | 6. 90E-20 |
| CBARP-DT       | 1. 564626608  | 4. 182624057 | 1. 30E-20 | 7. 02E-20 |
| LINC02532      | 2. 86768094   | 6. 867014875 | 1. 44E-20 | 7. 76E-20 |
| CNIH3-AS2      | 1. 450325633  | 4. 555256386 | 1. 70E-20 | 9. 14E-20 |
| LINC00887      | 1. 622845667  | 6. 365036966 | 2. 30E-20 | 1. 23E-19 |
| DLX2-DT        | 3. 03516102   | 4. 263944202 | 2. 62E-20 | 1. 40E-19 |
| LINC00605      | 1. 985477703  | 5. 527260561 | 2. 93E-20 | 1. 56E-19 |
| RIPOR3-AS1     | 2. 976783444  | 4. 672701658 | 3. 28E-20 | 1. 75E-19 |
| LINC01060      | -1. 159427563 | 5. 925797626 | 3. 37E-20 | 1. 79E-19 |
| LINC00664      | 1. 468854559  | 7. 057343518 | 4. 49E-20 | 2. 38E-19 |
| MELTF-AS1      | 1. 071742326  | 8. 746118202 | 4. 65E-20 | 2. 46E-19 |
| LINC01844      | -1. 452663088 | 4. 314848823 | 5. 53E-20 | 2. 93E-19 |
| LINC02263      | 3. 032004423  | 2. 986539424 | 5. 86E-20 | 3. 09E-19 |
| CFAP58-DT      | 1. 753050624  | 6. 461248441 | 6. 16E-20 | 3. 24E-19 |
| RASGRF2-AS1    | -1. 128791317 | 4. 331223453 | 6. 44E-20 | 3. 38E-19 |
| SPON1-AS1      | -1. 295209946 | 3. 139470558 | 1. 12E-19 | 5. 81E-19 |
| LINC02461      | 2. 148848126  | 4. 56808421  | 1. 84E-19 | 9. 50E-19 |
| SYNPR-AS1      | 2. 267085636  | 5. 762377307 | 1. 88E-19 | 9. 70E-19 |
| LINC01909      | 1. 126692706  | 6. 462142648 | 1. 91E-19 | 9. 82E-19 |
| LINC01208      | 3. 655708008  | 6. 741236581 | 2. 08E-19 | 1. 07E-18 |
| MNX1-AS2       | 2. 58249139   | 5. 18372087  | 2. 25E-19 | 1. 15E-18 |
| LINC02130      | 2. 245315961  | 4. 987121649 | 2. 44E-19 | 1. 25E-18 |
| LINC02725      | 2. 599616748  | 3. 776176867 | 2. 58E-19 | 1. 32E-18 |
| LINC02611      | 1. 451595043  | 7. 542223626 | 2. 65E-19 | 1. 35E-18 |
| PWRN1          | -2. 389890081 | 2. 933038588 | 2. 76E-19 | 1. 41E-18 |
| LINC02242      | -2. 177272776 | 3. 053874998 | 3. 28E-19 | 1. 67E-18 |
| TTC3-AS1       | 1. 085126896  | 4. 640323933 | 3. 69E-19 | 1. 87E-18 |
| LINC01146      | 1. 206028385  | 5. 275937245 | 4. 01E-19 | 2. 02E-18 |
| MYCNOS         | 2. 374153615  | 4. 502519259 | 4. 02E-19 | 2. 02E-18 |
| ADAMTS19-AS1   | 2. 52561383   | 5. 056800843 | 4. 89E-19 | 2. 45E-18 |
| LINC00844      | -2. 181710815 | 4. 78768167  | 4. 98E-19 | 2. 50E-18 |
| LINC02487      | 3. 371394499  | 8. 331613363 | 5. 03E-19 | 2. 52E-18 |
| CTD-3080P12. 3 | -1. 557317548 | 3. 283666194 | 5. 89E-19 | 2. 94E-18 |
| UCKL1-AS1      | 1. 161839531  | 6. 929242491 | 5. 91E-19 | 2. 95E-18 |
| LINC00545      | -1. 705338611 | 3. 097164691 | 6. 30E-19 | 3. 14E-18 |
| HAR1B          | 2. 928436384  | 6. 089746578 | 7. 37E-19 | 3. 66E-18 |
| INSYN1-AS1     | 4. 170070097  | 5. 296233445 | 7. 52E-19 | 3. 73E-18 |
| LINC00891      | -1. 04048085  | 4. 020437831 | 7. 78E-19 | 3. 85E-18 |
| LINC00461      | 3. 637816447  | 6. 20679917  | 9. 25E-19 | 4. 57E-18 |
| LINC00987      | -1. 004386518 | 8. 546714254 | 1. 14E-18 | 5. 62E-18 |
| EML4-AS1       | 1. 633194778  | 4. 347027274 | 1. 40E-18 | 6. 87E-18 |
| ZFH4-AS1       | -1. 100135042 | 6. 371932531 | 1. 54E-18 | 7. 57E-18 |
| LINC01727      | 2. 315954129  | 3. 565672874 | 1. 55E-18 | 7. 58E-18 |
| LINC01385      | 4. 36762989   | 4. 133173137 | 1. 61E-18 | 7. 88E-18 |

|             |               |              |           |           |
|-------------|---------------|--------------|-----------|-----------|
| LINC01132   | 1. 080020582  | 8. 211497995 | 1. 66E-18 | 8. 11E-18 |
| LINC00898   | 2. 778946979  | 4. 950147717 | 1. 76E-18 | 8. 59E-18 |
| LINC00603   | -1. 805458962 | 3. 054350536 | 1. 94E-18 | 9. 42E-18 |
| KIF26B-AS1  | 3. 279797999  | 3. 575342663 | 2. 25E-18 | 1. 09E-17 |
| LINC01665   | 4. 647418043  | 5. 069397823 | 2. 29E-18 | 1. 11E-17 |
| LINC02550   | -1. 094803115 | 4. 615270623 | 2. 38E-18 | 1. 15E-17 |
| MIRLET7A1HG | -1. 038660698 | 5. 092114323 | 2. 63E-18 | 1. 27E-17 |
| PRSS30P     | 1. 38285893   | 7. 162973819 | 3. 43E-18 | 1. 65E-17 |
| LINC01358   | -1. 209109117 | 3. 507140181 | 3. 47E-18 | 1. 67E-17 |
| RBAKDN      | 2. 943843434  | 3. 864808173 | 4. 42E-18 | 2. 12E-17 |
| DDX59-AS1   | 1. 681490423  | 5. 82834297  | 4. 84E-18 | 2. 31E-17 |
| MTOR-AS1    | -1. 560403846 | 3. 042497388 | 5. 00E-18 | 2. 39E-17 |
| LINC01833   | 3. 300527877  | 8. 50655167  | 5. 58E-18 | 2. 66E-17 |
| WARS2-IT1   | -1. 327409592 | 5. 5277798   | 6. 26E-18 | 2. 97E-17 |
| PDE2A-AS2   | 1. 13672662   | 5. 240846868 | 7. 28E-18 | 3. 45E-17 |
| BCAN-AS1    | 2. 238329217  | 9. 211515323 | 7. 85E-18 | 3. 72E-17 |
| CLMAT3      | -1. 074882687 | 4. 701528483 | 7. 92E-18 | 3. 74E-17 |
| UCA1        | 2. 605154009  | 8. 299194658 | 8. 26E-18 | 3. 90E-17 |
| OVOL1-AS1   | 1. 396532562  | 4. 40978188  | 8. 30E-18 | 3. 91E-17 |
| LINC02720   | 2. 407411432  | 4. 292567783 | 9. 03E-18 | 4. 24E-17 |
| NFE4        | 4. 746324582  | 8. 139373756 | 9. 79E-18 | 4. 58E-17 |
| LINC00632   | -1. 381352891 | 6. 058264673 | 1. 06E-17 | 4. 94E-17 |
| NR4A1AS     | -1. 236583221 | 7. 041247259 | 1. 09E-17 | 5. 06E-17 |
| PSLNR       | 5. 49299839   | 4. 865597123 | 1. 14E-17 | 5. 29E-17 |
| LINC01099   | -1. 831446331 | 2. 851928121 | 1. 43E-17 | 6. 62E-17 |
| LINC00974   | -1. 477001476 | 3. 303029946 | 1. 50E-17 | 6. 93E-17 |
| LINC01788   | 1. 849518324  | 4. 906547938 | 1. 59E-17 | 7. 37E-17 |
| FEZF1-AS1   | 3. 099032294  | 5. 527213498 | 1. 71E-17 | 7. 88E-17 |
| HOXC-AS2    | 1. 349785539  | 7. 433087316 | 1. 76E-17 | 8. 12E-17 |
| ZNF516-DT   | 1. 23929214   | 6. 430678342 | 1. 95E-17 | 8. 98E-17 |
| SCUBE1-AS2  | 3. 930173961  | 5. 15370167  | 2. 17E-17 | 9. 94E-17 |
| LINC02757   | -1. 255487413 | 2. 906555972 | 2. 24E-17 | 1. 02E-16 |
| SLC4A8-AS1  | 2. 30606373   | 3. 598330047 | 2. 25E-17 | 1. 03E-16 |
| C5orf34-AS1 | 1. 861431262  | 5. 414197943 | 3. 12E-17 | 1. 42E-16 |
| HOXB-AS3    | 2. 784687799  | 8. 734155847 | 3. 53E-17 | 1. 60E-16 |
| LINC01648   | 2. 397828929  | 3. 005969672 | 3. 55E-17 | 1. 61E-16 |
| NAV2-AS6    | -1. 172878153 | 7. 030143429 | 3. 63E-17 | 1. 64E-16 |
| LINC02533   | 2. 14398526   | 3. 820334273 | 4. 00E-17 | 1. 81E-16 |
| DIP2C-AS1   | -1. 266453443 | 6. 621273536 | 4. 26E-17 | 1. 92E-16 |
| LINC01863   | 2. 203437745  | 5. 241284203 | 4. 70E-17 | 2. 12E-16 |
| THSD4-AS1   | 2. 860034651  | 5. 223803503 | 5. 00E-17 | 2. 24E-16 |
| MAPT-IT1    | 2. 479932077  | 7. 202066041 | 5. 10E-17 | 2. 28E-16 |
| LINC01013   | -1. 003564614 | 5. 445357078 | 5. 32E-17 | 2. 37E-16 |
| C5orf64     | -1. 520646296 | 5. 022115145 | 5. 53E-17 | 2. 46E-16 |
| IL12A-AS1   | 1. 249446087  | 5. 089771522 | 5. 66E-17 | 2. 51E-16 |
| LINC02551   | 2. 761544616  | 6. 78020769  | 5. 66E-17 | 2. 51E-16 |
| STPG3-AS1   | 1. 262732884  | 6. 474400414 | 6. 01E-17 | 2. 66E-16 |
| VAC14-AS1   | 1. 071551672  | 4. 683601116 | 6. 38E-17 | 2. 83E-16 |
| C5orf38     | 1. 626272859  | 11. 38736989 | 7. 97E-17 | 3. 52E-16 |
| FAM230G     | 2. 810832433  | 3. 363519409 | 9. 99E-17 | 4. 40E-16 |
| FRGCA       | 2. 716639829  | 3. 856829329 | 1. 01E-16 | 4. 45E-16 |

|               |               |              |           |           |
|---------------|---------------|--------------|-----------|-----------|
| LINC01970     | 1. 097524082  | 4. 696348972 | 1. 03E-16 | 4. 54E-16 |
| LINC02636     | -1. 360585444 | 3. 393190229 | 1. 14E-16 | 5. 00E-16 |
| LINC02571     | 2. 132373713  | 5. 195683633 | 1. 14E-16 | 5. 01E-16 |
| SLX1A-SULT1A3 | 1. 306817821  | 3. 882965477 | 1. 24E-16 | 5. 40E-16 |
| LINC01010     | -1. 326238298 | 5. 651519118 | 1. 27E-16 | 5. 55E-16 |
| LINC01655     | 1. 813613372  | 4. 095944894 | 1. 37E-16 | 5. 94E-16 |
| IL21R-AS1     | 1. 454877494  | 4. 512192891 | 1. 41E-16 | 6. 13E-16 |
| DIRC1         | 1. 439604972  | 4. 957342844 | 1. 65E-16 | 7. 16E-16 |
| INHBA-AS1     | 1. 247151386  | 5. 375316091 | 1. 73E-16 | 7. 51E-16 |
| TDRG1         | 2. 556473588  | 3. 939223994 | 1. 78E-16 | 7. 72E-16 |
| DPP4-DT       | -1. 282456863 | 3. 668135767 | 1. 79E-16 | 7. 72E-16 |
| SNAP47-AS1    | 1. 380546736  | 3. 725632009 | 1. 85E-16 | 7. 97E-16 |
| NAMA          | -1. 339983612 | 3. 759784509 | 2. 00E-16 | 8. 60E-16 |
| LINC00540     | -1. 23605937  | 4. 841699539 | 2. 43E-16 | 1. 04E-15 |
| GACAT2        | 3. 188215521  | 5. 786466258 | 2. 46E-16 | 1. 05E-15 |
| LINC01979     | 1. 384602181  | 5. 636364893 | 2. 48E-16 | 1. 06E-15 |
| LINC02568     | 1. 866080421  | 10. 84397469 | 3. 03E-16 | 1. 29E-15 |
| RORB-AS1      | -1. 709209666 | 2. 965825202 | 3. 16E-16 | 1. 34E-15 |
| LHX1-DT       | 5. 435387578  | 5. 679174803 | 3. 18E-16 | 1. 35E-15 |
| C1orf147      | 1. 014813733  | 5. 155996422 | 3. 51E-16 | 1. 48E-15 |
| LINC02028     | 1. 056271778  | 6. 668497125 | 3. 85E-16 | 1. 63E-15 |
| GACAT3        | 2. 32963326   | 4. 412892549 | 3. 95E-16 | 1. 67E-15 |
| BRWD1-AS1     | 1. 236179503  | 4. 407170219 | 4. 33E-16 | 1. 83E-15 |
| MIR222HG      | -1. 019496063 | 7. 686651083 | 4. 65E-16 | 1. 96E-15 |
| TRPM2-AS      | 1. 606270253  | 9. 089623998 | 5. 18E-16 | 2. 18E-15 |
| LINC01998     | 2. 515446631  | 3. 71915011  | 5. 44E-16 | 2. 28E-15 |
| LINC01266     | -1. 51023796  | 5. 373558991 | 5. 45E-16 | 2. 28E-15 |
| DGCR5         | 1. 492441035  | 5. 986340073 | 5. 76E-16 | 2. 41E-15 |
| ANK3-DT       | 1. 591368016  | 4. 625911837 | 6. 20E-16 | 2. 59E-15 |
| LINC01556     | 1. 643154031  | 4. 498707789 | 6. 60E-16 | 2. 74E-15 |
| LINC00517     | -1. 075501262 | 4. 975343642 | 6. 67E-16 | 2. 77E-15 |
| MGC15885      | -1. 697709839 | 3. 12677161  | 7. 94E-16 | 3. 28E-15 |
| LINC02099     | 2. 301620151  | 6. 123823091 | 8. 48E-16 | 3. 50E-15 |
| LINC00896     | 1. 482386551  | 5. 416598602 | 8. 49E-16 | 3. 50E-15 |
| LINC01956     | 3. 192146965  | 7. 910649047 | 1. 00E-15 | 4. 12E-15 |
| LINC01287     | 3. 416403806  | 7. 603841434 | 1. 05E-15 | 4. 31E-15 |
| LINC00668     | 5. 294782317  | 9. 108270045 | 1. 10E-15 | 4. 52E-15 |
| LINC01546     | 1. 148809329  | 3. 72896858  | 1. 14E-15 | 4. 66E-15 |
| LINC01555     | 2. 052855976  | 3. 594635104 | 1. 16E-15 | 4. 71E-15 |
| LINC00518     | 4. 214192181  | 6. 005004041 | 1. 18E-15 | 4. 82E-15 |
| P3H2-AS1      | -1. 643314016 | 3. 882213637 | 1. 24E-15 | 5. 03E-15 |
| FAM153CP      | 1. 421450743  | 4. 917849732 | 1. 51E-15 | 6. 15E-15 |
| COLCA1        | -1. 27624585  | 9. 037608355 | 1. 56E-15 | 6. 34E-15 |
| LINC02554     | -1. 420370725 | 3. 007583881 | 1. 74E-15 | 7. 05E-15 |
| MEIS1-AS2     | -1. 224455775 | 2. 945257678 | 1. 74E-15 | 7. 05E-15 |
| FAM83A-AS1    | 2. 554506113  | 5. 093179601 | 1. 83E-15 | 7. 38E-15 |
| FLJ31356      | 1. 096373372  | 5. 879712934 | 1. 95E-15 | 7. 84E-15 |
| LINC00524     | 2. 76011507   | 3. 747124687 | 2. 04E-15 | 8. 20E-15 |
| LINC01239     | -1. 410917804 | 6. 808358561 | 2. 11E-15 | 8. 45E-15 |
| LINC01592     | 2. 148538353  | 3. 474643108 | 2. 16E-15 | 8. 65E-15 |
| GPRACR        | 1. 35870356   | 3. 784174713 | 2. 23E-15 | 8. 92E-15 |

|             |               |              |           |           |
|-------------|---------------|--------------|-----------|-----------|
| LINC02574   | 1. 8510507    | 3. 762312437 | 2. 24E-15 | 8. 94E-15 |
| BCRP3       | 1. 236530551  | 6. 449726429 | 2. 36E-15 | 9. 41E-15 |
| LINC00639   | -1. 129200582 | 7. 741348117 | 2. 76E-15 | 1. 10E-14 |
| LINC01293   | 2. 307935574  | 5. 409331436 | 3. 10E-15 | 1. 23E-14 |
| FAM242C     | 1. 174405314  | 4. 470355682 | 3. 37E-15 | 1. 33E-14 |
| NECTIN4-AS1 | 1. 477071887  | 4. 12642959  | 3. 39E-15 | 1. 34E-14 |
| LINC01558   | -1. 02061517  | 6. 5187731   | 3. 48E-15 | 1. 37E-14 |
| BSN-DT      | 1. 690475612  | 4. 231283783 | 4. 18E-15 | 1. 64E-14 |
| HPYR1       | 2. 190045934  | 3. 197029053 | 4. 20E-15 | 1. 65E-14 |
| ETV7-AS1    | 1. 438033651  | 4. 362394478 | 4. 39E-15 | 1. 72E-14 |
| USP2-AS1    | 1. 24205815   | 6. 43194515  | 4. 76E-15 | 1. 86E-14 |
| CRAT37      | 2. 805368099  | 5. 347152072 | 5. 07E-15 | 1. 98E-14 |
| LINC02247   | 4. 606360417  | 4. 926667918 | 5. 09E-15 | 1. 98E-14 |
| LINC01811   | 3. 493128236  | 4. 186260379 | 5. 77E-15 | 2. 24E-14 |
| UMODL1-AS1  | 2. 176544094  | 4. 998251709 | 6. 01E-15 | 2. 33E-14 |
| HCG20       | 1. 066111169  | 4. 829234579 | 6. 06E-15 | 2. 35E-14 |
| STAG1-DT    | 1. 443294334  | 3. 446538767 | 6. 27E-15 | 2. 43E-14 |
| LINC01389   | 1. 073282743  | 5. 803318096 | 6. 30E-15 | 2. 44E-14 |
| NCKAP5-AS2  | -1. 109058672 | 4. 680531316 | 6. 73E-15 | 2. 59E-14 |
| PPP1R21-DT  | 1. 035097407  | 4. 987398401 | 7. 03E-15 | 2. 70E-14 |
| LINC01883   | -1. 98075794  | 3. 60774166  | 7. 18E-15 | 2. 75E-14 |
| ETV5-AS1    | -1. 234969029 | 3. 377950899 | 8. 09E-15 | 3. 09E-14 |
| LINC02516   | 1. 364085662  | 5. 000570817 | 8. 29E-15 | 3. 16E-14 |
| FAM181A-AS1 | -1. 6921956   | 2. 951498656 | 8. 33E-15 | 3. 17E-14 |
| LINC01357   | 1. 605205119  | 4. 636293641 | 8. 40E-15 | 3. 19E-14 |
| MECOM-AS1   | -1. 301581202 | 3. 177535    | 8. 77E-15 | 3. 33E-14 |
| COL25A1-DT  | -1. 123111461 | 2. 917821413 | 9. 03E-15 | 3. 43E-14 |
| LINC02345   | 1. 31934034   | 5. 76743283  | 9. 98E-15 | 3. 78E-14 |
| KCNMB2-AS1  | 2. 863266771  | 6. 651823214 | 1. 00E-14 | 3. 79E-14 |
| LINC02234   | -1. 169916529 | 3. 965964294 | 1. 09E-14 | 4. 11E-14 |
| LINC01297   | 4. 120752779  | 4. 120864796 | 1. 15E-14 | 4. 34E-14 |
| LINC02438   | 3. 53677944   | 3. 763837296 | 1. 25E-14 | 4. 70E-14 |
| C8orf86     | 2. 042394938  | 5. 97915056  | 1. 26E-14 | 4. 73E-14 |
| C8orf37-AS1 | 1. 070335797  | 5. 94025698  | 1. 32E-14 | 4. 97E-14 |
| SUGCT-AS1   | 1. 468792879  | 5. 667634181 | 1. 33E-14 | 4. 97E-14 |
| VAV3-AS1    | 1. 90006469   | 4. 195794237 | 1. 37E-14 | 5. 13E-14 |
| LINC01121   | 1. 055525652  | 6. 021660726 | 1. 74E-14 | 6. 50E-14 |
| LINC02036   | 1. 408680286  | 7. 163681025 | 1. 85E-14 | 6. 88E-14 |
| LINC02254   | -1. 96412711  | 2. 98553791  | 2. 11E-14 | 7. 86E-14 |
| PINCR       | 4. 272872317  | 4. 409721007 | 2. 12E-14 | 7. 88E-14 |
| LINC00494   | 1. 890922871  | 5. 898633692 | 2. 18E-14 | 8. 07E-14 |
| DRAIC       | 1. 631402402  | 9. 699815887 | 2. 20E-14 | 8. 14E-14 |
| LINCR-0001  | -1. 128689178 | 6. 12145027  | 2. 35E-14 | 8. 69E-14 |
| IL21-AS1    | 2. 067275819  | 4. 167846476 | 2. 52E-14 | 9. 31E-14 |
| LINC02446   | 1. 766652899  | 6. 756980206 | 2. 74E-14 | 1. 01E-13 |
| LINC02417   | 2. 105983978  | 3. 169075475 | 2. 85E-14 | 1. 05E-13 |
| LINC02351   | -1. 805221557 | 3. 834296945 | 2. 89E-14 | 1. 06E-13 |
| LINC01771   | 1. 542433871  | 3. 735192022 | 2. 98E-14 | 1. 09E-13 |
| GS1-24F4. 2 | -1. 390553244 | 4. 150653154 | 3. 01E-14 | 1. 10E-13 |
| GSTCD-AS1   | 1. 040251032  | 4. 181517882 | 3. 13E-14 | 1. 14E-13 |
| TMEM105     | 1. 488046152  | 7. 340910703 | 3. 50E-14 | 1. 27E-13 |

|             |               |              |           |           |
|-------------|---------------|--------------|-----------|-----------|
| LINC02433   | 3. 571647174  | 6. 08348469  | 3. 90E-14 | 1. 42E-13 |
| MIR4713HG   | 3. 440780881  | 3. 838015098 | 4. 01E-14 | 1. 46E-13 |
| LINC02761   | -1. 026816428 | 5. 14667193  | 4. 16E-14 | 1. 51E-13 |
| LINC02560   | 1. 613926966  | 7. 056718927 | 4. 40E-14 | 1. 60E-13 |
| SLC9A3-AS1  | 1. 013491611  | 10. 1204485  | 4. 69E-14 | 1. 70E-13 |
| LINC01410   | 1. 139403635  | 9. 272506801 | 4. 96E-14 | 1. 79E-13 |
| LINC01953   | 4. 134845819  | 3. 188691396 | 5. 31E-14 | 1. 92E-13 |
| LINC02830   | 3. 263707874  | 4. 658370315 | 6. 15E-14 | 2. 22E-13 |
| SILC1       | 2. 679473884  | 6. 782766873 | 6. 63E-14 | 2. 38E-13 |
| CARHSP1-DT  | 1. 521369989  | 3. 256204046 | 7. 97E-14 | 2. 86E-13 |
| PLAC4       | 2. 186323998  | 7. 435440494 | 8. 05E-14 | 2. 88E-13 |
| LINC02077   | 5. 610456708  | 4. 182434022 | 8. 88E-14 | 3. 17E-13 |
| TMEM92-AS1  | 1. 168978861  | 5. 4736816   | 9. 04E-14 | 3. 22E-13 |
| LINC00613   | 4. 885126853  | 3. 638050276 | 1. 10E-13 | 3. 88E-13 |
| ZNF474-AS1  | 1. 539913187  | 3. 651698629 | 1. 11E-13 | 3. 94E-13 |
| HOXB-AS4    | 2. 883281056  | 3. 852160901 | 1. 25E-13 | 4. 41E-13 |
| LSINCT5     | -1. 313420539 | 4. 857235484 | 1. 30E-13 | 4. 60E-13 |
| LINC02147   | -1. 452991479 | 3. 591392267 | 1. 31E-13 | 4. 61E-13 |
| LINC01022   | 2. 760503534  | 2. 992541182 | 1. 32E-13 | 4. 64E-13 |
| LINC02518   | -1. 420842587 | 4. 240272874 | 1. 36E-13 | 4. 79E-13 |
| LINC02208   | 1. 814656898  | 4. 326075173 | 1. 37E-13 | 4. 80E-13 |
| FER1L6-AS2  | 4. 046948487  | 3. 878511563 | 1. 71E-13 | 5. 97E-13 |
| SLC7A11-AS1 | 1. 755943045  | 4. 19653994  | 1. 83E-13 | 6. 37E-13 |
| LINC02520   | 1. 679818535  | 3. 895453503 | 1. 84E-13 | 6. 39E-13 |
| LINC01647   | 3. 063048255  | 3. 037869439 | 1. 88E-13 | 6. 53E-13 |
| PTCHD1-AS   | -1. 560308626 | 3. 045648388 | 1. 90E-13 | 6. 58E-13 |
| IRAIN       | 1. 847663532  | 6. 06307776  | 2. 05E-13 | 7. 10E-13 |
| NDP-AS1     | 3. 073986121  | 3. 591232681 | 2. 06E-13 | 7. 11E-13 |
| SIX3-AS1    | 3. 117959308  | 4. 75267938  | 2. 06E-13 | 7. 12E-13 |
| FLJ16779    | 1. 842270047  | 5. 875802663 | 2. 14E-13 | 7. 38E-13 |
| RYR3-DT     | -1. 873060046 | 3. 651924964 | 2. 30E-13 | 7. 87E-13 |
| ASH1L-IT1   | 1. 686581765  | 3. 055829313 | 2. 35E-13 | 8. 04E-13 |
| CSTF3-DT    | 1. 08892029   | 4. 025763941 | 2. 50E-13 | 8. 53E-13 |
| USP7-AS1    | 1. 042796476  | 3. 876128787 | 2. 68E-13 | 9. 12E-13 |
| LINC01926   | 2. 602969174  | 2. 919236981 | 2. 72E-13 | 9. 25E-13 |
| LINC00452   | 1. 623116976  | 3. 478317934 | 2. 74E-13 | 9. 30E-13 |
| LINC01087   | 2. 188270807  | 10. 39588366 | 3. 09E-13 | 1. 05E-12 |
| LINC02245   | 1. 620895402  | 3. 905987632 | 3. 28E-13 | 1. 11E-12 |
| CDKN2A-DT   | 2. 015946204  | 3. 815731048 | 3. 53E-13 | 1. 19E-12 |
| LINC02073   | 1. 249054903  | 5. 133290162 | 3. 56E-13 | 1. 20E-12 |
| LINC02539   | 1. 926978674  | 2. 813138849 | 3. 67E-13 | 1. 24E-12 |
| LINC02475   | 3. 007640415  | 5. 838306512 | 4. 32E-13 | 1. 45E-12 |
| FAM230C     | 5. 115939048  | 4. 164277805 | 4. 44E-13 | 1. 49E-12 |
| FRY-AS1     | 1. 349163773  | 4. 324351033 | 4. 65E-13 | 1. 56E-12 |
| LINC02015   | 1. 91244503   | 7. 553335723 | 4. 67E-13 | 1. 56E-12 |
| LNCAROD     | 2. 675616631  | 5. 856894419 | 4. 82E-13 | 1. 61E-12 |
| PBX1-AS1    | 2. 013039061  | 4. 058841532 | 4. 99E-13 | 1. 67E-12 |
| MAGEA4-AS1  | 5. 52566303   | 4. 480690449 | 5. 57E-13 | 1. 85E-12 |
| LINC01163   | 1. 722522152  | 3. 715797478 | 5. 70E-13 | 1. 89E-12 |
| VPS9D1-AS1  | 1. 11510405   | 9. 694832486 | 6. 18E-13 | 2. 05E-12 |
| CATIP-AS2   | 1. 757289639  | 3. 330841369 | 6. 37E-13 | 2. 11E-12 |

|             |               |              |           |           |
|-------------|---------------|--------------|-----------|-----------|
| PKP4-AS1    | 1. 061229221  | 7. 579514752 | 6. 57E-13 | 2. 17E-12 |
| TPRG1-AS2   | 2. 037559463  | 4. 224100643 | 7. 02E-13 | 2. 31E-12 |
| LINC01351   | 3. 245740613  | 5. 592779676 | 7. 55E-13 | 2. 48E-12 |
| SCG5-AS1    | 1. 580343348  | 3. 049304465 | 7. 78E-13 | 2. 56E-12 |
| MYO3B-AS1   | 3. 215839392  | 4. 097156352 | 7. 97E-13 | 2. 62E-12 |
| FOXP4-AS1   | 1. 169666089  | 7. 071109539 | 7. 99E-13 | 2. 62E-12 |
| MDS2        | 1. 305044276  | 4. 214775178 | 8. 32E-13 | 2. 72E-12 |
| LINC00504   | 1. 435721805  | 11. 03393031 | 8. 65E-13 | 2. 82E-12 |
| LINC00165   | -1. 362383816 | 4. 377390596 | 9. 02E-13 | 2. 93E-12 |
| LINC02197   | 3. 795601272  | 5. 583016624 | 9. 22E-13 | 2. 99E-12 |
| MIR181A1HG  | 1. 475631688  | 4. 061852987 | 9. 50E-13 | 3. 08E-12 |
| MIR7-3HG    | 3. 85353535   | 5. 140193195 | 9. 66E-13 | 3. 13E-12 |
| LINC01740   | 1. 69428771   | 4. 389307561 | 1. 02E-12 | 3. 30E-12 |
| LINC01234   | 2. 821995829  | 5. 346373961 | 1. 03E-12 | 3. 32E-12 |
| LINC02679   | -1. 136659233 | 2. 946548965 | 1. 05E-12 | 3. 41E-12 |
| LINC02112   | 2. 146891231  | 3. 04347012  | 1. 09E-12 | 3. 52E-12 |
| PIK3CD-AS1  | 1. 189742314  | 4. 139831524 | 1. 10E-12 | 3. 53E-12 |
| DLG1-AS1    | 1. 029081037  | 5. 374385166 | 1. 10E-12 | 3. 55E-12 |
| LINC01214   | 1. 780730772  | 3. 810550578 | 1. 13E-12 | 3. 63E-12 |
| LINC01983   | 2. 496604122  | 4. 746990989 | 1. 13E-12 | 3. 64E-12 |
| LINC00158   | 1. 52552369   | 4. 061468024 | 1. 18E-12 | 3. 78E-12 |
| IDH2-DT     | 1. 541702886  | 4. 718618162 | 1. 19E-12 | 3. 81E-12 |
| LINC02874   | 2. 019034151  | 3. 110793476 | 1. 42E-12 | 4. 51E-12 |
| DELEC1      | 1. 787715356  | 5. 656953914 | 1. 50E-12 | 4. 76E-12 |
| LINC02418   | 3. 310815057  | 4. 289937418 | 1. 57E-12 | 4. 98E-12 |
| LINC01606   | 3. 757283517  | 5. 812027748 | 1. 57E-12 | 4. 99E-12 |
| LINC02450   | 1. 610952337  | 3. 967046611 | 1. 61E-12 | 5. 09E-12 |
| LINC00305   | 4. 680615534  | 3. 702245733 | 1. 61E-12 | 5. 10E-12 |
| KCNK15-AS1  | 1. 032379014  | 6. 77687595  | 1. 64E-12 | 5. 19E-12 |
| LINC00299   | 1. 064546512  | 5. 055629209 | 1. 75E-12 | 5. 51E-12 |
| LURAP1L-AS1 | 1. 589588747  | 4. 260393186 | 1. 83E-12 | 5. 75E-12 |
| LINC02542   | 1. 480432877  | 6. 416175144 | 2. 02E-12 | 6. 35E-12 |
| GTSCR1      | 2. 041828001  | 3. 133434008 | 2. 06E-12 | 6. 47E-12 |
| LINC01419   | 6. 870677894  | 6. 03622285  | 2. 07E-12 | 6. 47E-12 |
| LINC02705   | -1. 066327004 | 3. 194092563 | 2. 16E-12 | 6. 76E-12 |
| MAPT-AS1    | 2. 214981096  | 7. 405140559 | 2. 37E-12 | 7. 41E-12 |
| LINC02014   | 1. 431380984  | 5. 125482774 | 2. 51E-12 | 7. 83E-12 |
| LINC02097   | -1. 162580118 | 4. 506971942 | 2. 61E-12 | 8. 12E-12 |
| FARSA-AS1   | 1. 821237728  | 3. 431769329 | 2. 94E-12 | 9. 09E-12 |
| C2orf91     | 1. 242965297  | 4. 486179714 | 2. 96E-12 | 9. 12E-12 |
| LINC02278   | 1. 616458047  | 3. 536320204 | 2. 96E-12 | 9. 13E-12 |
| LINC02880   | -1. 417069957 | 4. 566609424 | 3. 51E-12 | 1. 08E-11 |
| LINC01879   | 2. 692023543  | 3. 207341324 | 3. 56E-12 | 1. 09E-11 |
| MIR378D2HG  | 1. 101899014  | 3. 99331718  | 3. 66E-12 | 1. 13E-11 |
| LINC00392   | 5. 814607994  | 4. 712139353 | 3. 99E-12 | 1. 22E-11 |
| LINC02100   | 1. 453897993  | 3. 84600602  | 4. 13E-12 | 1. 26E-11 |
| LINC02324   | 1. 756054436  | 2. 994736089 | 4. 52E-12 | 1. 38E-11 |
| LINC01303   | 1. 219327489  | 5. 315689871 | 4. 80E-12 | 1. 47E-11 |
| LINC02129   | 2. 992254546  | 3. 447782293 | 4. 83E-12 | 1. 47E-11 |
| LINC01271   | 1. 066267347  | 5. 315888618 | 5. 12E-12 | 1. 56E-11 |
| LINC02875   | 1. 161158321  | 5. 980902314 | 5. 33E-12 | 1. 62E-11 |

|                  |               |              |           |           |
|------------------|---------------|--------------|-----------|-----------|
| LINC01513        | 2. 017015231  | 3. 757300958 | 5. 38E-12 | 1. 63E-11 |
| LINC01445        | 4. 833017606  | 3. 741912579 | 5. 94E-12 | 1. 80E-11 |
| LINC02054        | 2. 036499438  | 4. 134894943 | 5. 96E-12 | 1. 80E-11 |
| BFSP2-AS1        | 1. 958495658  | 5. 352035496 | 6. 10E-12 | 1. 84E-11 |
| LINC01583        | 1. 82634788   | 3. 102792935 | 6. 44E-12 | 1. 95E-11 |
| VSTM2A-OT1       | 4. 409483764  | 6. 872639117 | 7. 67E-12 | 2. 30E-11 |
| LINC01653        | 5. 790282796  | 4. 716625647 | 8. 06E-12 | 2. 42E-11 |
| ELDR             | 2. 938532107  | 3. 924254506 | 8. 11E-12 | 2. 43E-11 |
| C1QTNF1-AS1      | -1. 235333458 | 3. 888045636 | 8. 83E-12 | 2. 64E-11 |
| LINC02868        | 2. 282218403  | 2. 875750631 | 9. 87E-12 | 2. 94E-11 |
| LINC02506        | 3. 843075313  | 5. 994343882 | 1. 01E-11 | 3. 00E-11 |
| LINC02067        | 1. 508014154  | 4. 17533519  | 1. 02E-11 | 3. 02E-11 |
| MIR663AHG        | 3. 305088176  | 3. 714098944 | 1. 14E-11 | 3. 38E-11 |
| LINC01518        | 4. 170818185  | 3. 731632958 | 1. 29E-11 | 3. 81E-11 |
| LINC00930        | 1. 273712881  | 7. 122255643 | 1. 41E-11 | 4. 14E-11 |
| LINC00322        | 1. 261055912  | 3. 830654145 | 1. 41E-11 | 4. 14E-11 |
| AAACL2-AS1       | -1. 082766009 | 4. 645008632 | 1. 48E-11 | 4. 36E-11 |
| LINC02753        | -1. 312154633 | 3. 049199796 | 1. 55E-11 | 4. 55E-11 |
| LINC00992        | 2. 310327296  | 7. 216065276 | 1. 63E-11 | 4. 77E-11 |
| LINC02273        | 1. 329379839  | 6. 125434531 | 1. 70E-11 | 4. 96E-11 |
| LINC00365        | 1. 300604403  | 4. 926464511 | 1. 71E-11 | 4. 98E-11 |
| LINC00210        | 4. 639222539  | 3. 555911365 | 1. 77E-11 | 5. 17E-11 |
| FGF12-AS3        | -1. 209318082 | 3. 267137722 | 1. 81E-11 | 5. 27E-11 |
| LINC00221        | 3. 877381021  | 5. 615449011 | 1. 90E-11 | 5. 53E-11 |
| LINC01479        | -1. 164659557 | 3. 026020145 | 1. 97E-11 | 5. 73E-11 |
| DNM3-IT1         | 1. 281777759  | 3. 07157817  | 2. 00E-11 | 5. 81E-11 |
| LINC01283        | 1. 614446615  | 2. 906732584 | 2. 12E-11 | 6. 13E-11 |
| C8orf31          | 1. 333701825  | 7. 797468584 | 2. 12E-11 | 6. 13E-11 |
| MYB-AS1          | 1. 332783977  | 4. 256328667 | 2. 21E-11 | 6. 38E-11 |
| NAALADL2-AS2     | 2. 872115624  | 4. 706711821 | 2. 21E-11 | 6. 38E-11 |
| LINC02577        | 2. 437031018  | 4. 156793629 | 2. 43E-11 | 7. 01E-11 |
| C7orf77          | 2. 545674374  | 3. 487190581 | 2. 53E-11 | 7. 29E-11 |
| COL4A2-AS2       | -1. 273978078 | 3. 498144012 | 2. 76E-11 | 7. 93E-11 |
| LINCR-0003       | -1. 789588216 | 3. 878522802 | 2. 77E-11 | 7. 95E-11 |
| LINC02332        | 1. 529994446  | 3. 974776621 | 3. 21E-11 | 9. 18E-11 |
| LINC02774        | 1. 680087242  | 3. 869786138 | 3. 61E-11 | 1. 03E-10 |
| TBL1XR1-AS1      | 1. 456772516  | 3. 765565813 | 3. 92E-11 | 1. 11E-10 |
| C5orf60          | 1. 039977833  | 3. 871456593 | 4. 03E-11 | 1. 14E-10 |
| C17orf102        | 2. 950380198  | 4. 05472523  | 4. 10E-11 | 1. 16E-10 |
| TRBV11-2         | 1. 343638177  | 5. 07037558  | 4. 13E-11 | 1. 17E-10 |
| LINC01508        | 1. 83210095   | 6. 01952057  | 4. 15E-11 | 1. 17E-10 |
| LINC02003        | 2. 876649485  | 3. 190833804 | 4. 38E-11 | 1. 24E-10 |
| LINC01896        | 3. 141179622  | 3. 358682544 | 4. 56E-11 | 1. 28E-10 |
| ATXN80S          | 4. 540163568  | 4. 019794723 | 4. 58E-11 | 1. 29E-10 |
| PEX5L-AS1        | 2. 506006289  | 2. 870738957 | 5. 22E-11 | 1. 46E-10 |
| LINC02463        | 1. 487251061  | 4. 027404804 | 5. 27E-11 | 1. 48E-10 |
| LINC02046        | 3. 232821347  | 3. 323478382 | 5. 49E-11 | 1. 54E-10 |
| TLR8-AS1         | 2. 154420117  | 3. 582473585 | 5. 68E-11 | 1. 59E-10 |
| LINC01694        | 1. 693139904  | 6. 619123829 | 5. 77E-11 | 1. 61E-10 |
| LINC02159        | 2. 015589393  | 5. 13458196  | 6. 37E-11 | 1. 77E-10 |
| LL22NC03-63E9. 3 | 2. 396751691  | 3. 766865706 | 6. 48E-11 | 1. 80E-10 |

|              |               |              |           |           |
|--------------|---------------|--------------|-----------|-----------|
| LINC00867    | 2. 351420802  | 4. 912859319 | 7. 00E-11 | 1. 94E-10 |
| FOXCUT       | 2. 729785146  | 6. 779805391 | 7. 33E-11 | 2. 03E-10 |
| LINC02335    | 4. 028072588  | 3. 260525088 | 7. 90E-11 | 2. 18E-10 |
| MIR4300HG    | 2. 29649717   | 3. 767226379 | 8. 16E-11 | 2. 25E-10 |
| LMNB1-DT     | 1. 541728114  | 2. 84613156  | 8. 33E-11 | 2. 29E-10 |
| SAMSN1-AS1   | 1. 590666407  | 2. 890197631 | 8. 44E-11 | 2. 32E-10 |
| LINC02223    | 1. 555916527  | 3. 486526544 | 8. 62E-11 | 2. 37E-10 |
| CEACAM16-AS1 | 1. 106575324  | 7. 712322381 | 9. 02E-11 | 2. 47E-10 |
| LINC01425    | 3. 992961855  | 3. 483223298 | 9. 06E-11 | 2. 48E-10 |
| LINC02389    | 1. 193652759  | 5. 167552488 | 9. 27E-11 | 2. 53E-10 |
| ADORA2A-AS1  | 1. 064886904  | 6. 123597774 | 9. 37E-11 | 2. 56E-10 |
| HAR1A        | 1. 574952383  | 7. 460420244 | 9. 56E-11 | 2. 61E-10 |
| LINC02163    | 3. 219008843  | 3. 924630423 | 1. 04E-10 | 2. 83E-10 |
| HOXA11-AS    | 1. 283288941  | 6. 374071055 | 1. 16E-10 | 3. 16E-10 |
| LINC01446    | 3. 795092658  | 5. 287134151 | 1. 20E-10 | 3. 27E-10 |
| LINC01411    | 2. 058396435  | 7. 954464722 | 1. 34E-10 | 3. 63E-10 |
| GATA2-AS1    | 1. 198719463  | 8. 693724375 | 1. 34E-10 | 3. 65E-10 |
| LINC02253    | 3. 66594102   | 4. 70008717  | 1. 45E-10 | 3. 93E-10 |
| LINC01940    | -1. 04354872  | 3. 409213099 | 1. 46E-10 | 3. 95E-10 |
| NR1R         | 1. 145130718  | 5. 618221848 | 1. 69E-10 | 4. 58E-10 |
| LINC00544    | 1. 818050856  | 3. 553941259 | 1. 70E-10 | 4. 60E-10 |
| LINC01674    | 2. 448567587  | 2. 801426418 | 1. 73E-10 | 4. 67E-10 |
| LINC00261    | 5. 786619694  | 6. 255183511 | 1. 76E-10 | 4. 74E-10 |
| LINC02752    | 1. 222801086  | 3. 968905821 | 1. 80E-10 | 4. 86E-10 |
| LINC00824    | 2. 192947294  | 4. 502656    | 1. 83E-10 | 4. 92E-10 |
| DLX6-AS1     | 1. 927947254  | 6. 338568109 | 2. 08E-10 | 5. 58E-10 |
| LINC01342    | 1. 19489548   | 5. 615150662 | 2. 09E-10 | 5. 61E-10 |
| LINC01633    | 3. 570578793  | 3. 256257853 | 2. 14E-10 | 5. 72E-10 |
| LINC01924    | 3. 524328032  | 4. 52319727  | 2. 14E-10 | 5. 73E-10 |
| LINC00923    | -1. 253087177 | 3. 860993271 | 2. 29E-10 | 6. 11E-10 |
| LINC02882    | 3. 136868648  | 4. 124246509 | 2. 38E-10 | 6. 34E-10 |
| C8orf87      | 3. 27055311   | 4. 424322864 | 2. 58E-10 | 6. 87E-10 |
| LINC02694    | 1. 403475063  | 3. 253283579 | 2. 76E-10 | 7. 34E-10 |
| SOX9-AS1     | -1. 083438474 | 9. 84903727  | 2. 79E-10 | 7. 39E-10 |
| LINC01215    | 1. 468687468  | 6. 498052677 | 3. 24E-10 | 8. 55E-10 |
| LINC02377    | 4. 517868742  | 3. 786541105 | 3. 28E-10 | 8. 62E-10 |
| LINC02515    | -1. 304563632 | 6. 159229624 | 3. 65E-10 | 9. 59E-10 |
| RMRP         | 4. 097958735  | 4. 801802175 | 3. 95E-10 | 1. 04E-09 |
| LINC01973    | 1. 281942235  | 3. 498470079 | 4. 12E-10 | 1. 08E-09 |
| LINC00944    | 1. 187614889  | 5. 633436207 | 4. 38E-10 | 1. 14E-09 |
| CLLU1-AS1    | 1. 931114086  | 4. 649626017 | 4. 53E-10 | 1. 18E-09 |
| CELF2-AS1    | -1. 029224519 | 5. 043735959 | 4. 95E-10 | 1. 29E-09 |
| LINC02732    | 2. 855442188  | 4. 403518868 | 5. 04E-10 | 1. 31E-09 |
| LINC01781    | 1. 670205436  | 5. 024409966 | 5. 31E-10 | 1. 38E-09 |
| GRIK1-AS1    | -1. 245673825 | 6. 966692195 | 5. 94E-10 | 1. 54E-09 |
| LINC01489    | 1. 365204408  | 5. 623448198 | 5. 98E-10 | 1. 55E-09 |
| PACRG-AS1    | -1. 141544944 | 3. 600983431 | 6. 00E-10 | 1. 55E-09 |
| C2-AS1       | 1. 076340742  | 4. 134038953 | 6. 03E-10 | 1. 56E-09 |
| LINC00858    | 3. 076823985  | 5. 164516452 | 6. 10E-10 | 1. 57E-09 |
| HUNK-AS1     | 2. 028589859  | 3. 048621032 | 6. 16E-10 | 1. 59E-09 |
| LINC01475    | 2. 992685843  | 2. 878261345 | 6. 17E-10 | 1. 59E-09 |

|              |               |              |           |           |
|--------------|---------------|--------------|-----------|-----------|
| LINC00563    | 1. 614080412  | 3. 374103025 | 6. 29E-10 | 1. 62E-09 |
| LINC02707    | 1. 400866     | 3. 722936299 | 6. 31E-10 | 1. 62E-09 |
| SKAP1-AS1    | 1. 208002983  | 3. 484076348 | 6. 57E-10 | 1. 69E-09 |
| LIVAR        | 1. 538928382  | 4. 506973413 | 6. 96E-10 | 1. 78E-09 |
| LINC02037    | 1. 859706675  | 3. 631527277 | 7. 19E-10 | 1. 84E-09 |
| LINC01664    | 1. 11420793   | 4. 026988978 | 7. 37E-10 | 1. 88E-09 |
| POU6F2-AS2   | 3. 59237251   | 3. 508825562 | 8. 13E-10 | 2. 07E-09 |
| LINC01675    | 1. 651885741  | 3. 086120028 | 8. 21E-10 | 2. 09E-09 |
| LINC02484    | 3. 928770554  | 3. 176802208 | 8. 99E-10 | 2. 28E-09 |
| LINC00564    | 5. 010635698  | 4. 086296769 | 9. 76E-10 | 2. 47E-09 |
| LINC02055    | 2. 598170058  | 5. 415713512 | 1. 04E-09 | 2. 62E-09 |
| NCKAP5-IT1   | 1. 585511984  | 2. 95547887  | 1. 05E-09 | 2. 64E-09 |
| LINC02521    | 1. 295453586  | 3. 300791203 | 1. 06E-09 | 2. 68E-09 |
| DSCR4        | 3. 695757424  | 3. 253407465 | 1. 13E-09 | 2. 84E-09 |
| BANCR        | 2. 432126206  | 5. 443268761 | 1. 15E-09 | 2. 90E-09 |
| LINC02074    | 2. 591114991  | 2. 840829603 | 1. 22E-09 | 3. 05E-09 |
| LINC00589    | 1. 879606767  | 6. 48507619  | 1. 23E-09 | 3. 08E-09 |
| BARX1-DT     | 2. 885444084  | 3. 312630226 | 1. 25E-09 | 3. 14E-09 |
| LINC01574    | 3. 156102415  | 3. 23045357  | 1. 30E-09 | 3. 26E-09 |
| ARHGAP28-AS1 | -1. 007662497 | 4. 081594031 | 1. 31E-09 | 3. 26E-09 |
| LINC02816    | 1. 102325162  | 3. 407030743 | 1. 45E-09 | 3. 60E-09 |
| LINC02860    | -1. 122199477 | 2. 777060133 | 1. 46E-09 | 3. 63E-09 |
| LINC00113    | 2. 287304555  | 3. 574119652 | 1. 48E-09 | 3. 67E-09 |
| GRAMD1A-AS1  | 1. 040215414  | 3. 353865072 | 1. 57E-09 | 3. 87E-09 |
| LINC00520    | 1. 510306457  | 3. 641157703 | 1. 57E-09 | 3. 87E-09 |
| LINC02809    | 1. 016835524  | 4. 127536252 | 1. 58E-09 | 3. 91E-09 |
| LINC02154    | 1. 836826454  | 4. 376374481 | 1. 60E-09 | 3. 95E-09 |
| SDAD1-AS1    | 1. 377600523  | 3. 027597316 | 1. 72E-09 | 4. 24E-09 |
| LINC01470    | 2. 297676863  | 3. 300771425 | 1. 78E-09 | 4. 38E-09 |
| LINC01906    | 2. 187556787  | 3. 675861538 | 1. 93E-09 | 4. 72E-09 |
| LINC02466    | 3. 2710377    | 3. 18632145  | 1. 93E-09 | 4. 74E-09 |
| LINC01124    | 1. 336484986  | 7. 36084269  | 2. 02E-09 | 4. 93E-09 |
| LINC02241    | 3. 134418415  | 3. 108018997 | 2. 15E-09 | 5. 26E-09 |
| RBMS3-AS2    | -1. 108302245 | 3. 375642441 | 2. 16E-09 | 5. 28E-09 |
| LINC02523    | 2. 751977326  | 3. 601788996 | 2. 31E-09 | 5. 63E-09 |
| LINC01414    | 2. 878937519  | 3. 00274485  | 2. 41E-09 | 5. 85E-09 |
| LINC02380    | 2. 480732673  | 2. 870285745 | 2. 58E-09 | 6. 25E-09 |
| LINC01992    | 3. 470506223  | 4. 776907517 | 2. 70E-09 | 6. 54E-09 |
| LINC01436    | 1. 4842826    | 8. 791389494 | 2. 76E-09 | 6. 70E-09 |
| LINC01716    | 4. 464950284  | 4. 461751223 | 2. 79E-09 | 6. 75E-09 |
| LINC02378    | 3. 777107348  | 3. 596377644 | 2. 80E-09 | 6. 78E-09 |
| MIR548XHG    | 4. 095973004  | 4. 452292881 | 2. 88E-09 | 6. 95E-09 |
| LINC00200    | 3. 470084301  | 4. 351400563 | 3. 02E-09 | 7. 29E-09 |
| LINC01269    | 1. 335504066  | 5. 125086721 | 3. 26E-09 | 7. 86E-09 |
| PAQR5-DT     | 1. 402443257  | 4. 923526535 | 3. 45E-09 | 8. 30E-09 |
| LINC02869    | 1. 700988877  | 3. 521343888 | 3. 51E-09 | 8. 43E-09 |
| SMYD3-IT1    | 1. 623523741  | 3. 040125294 | 3. 54E-09 | 8. 51E-09 |
| BBOX1-AS1    | 1. 166896174  | 5. 317415544 | 3. 66E-09 | 8. 79E-09 |
| LINC01792    | 1. 235585758  | 4. 290634714 | 3. 96E-09 | 9. 49E-09 |
| LINC01764    | 1. 134206535  | 3. 442985836 | 4. 18E-09 | 1. 00E-08 |
| LINC00402    | 1. 553732931  | 5. 193199677 | 4. 69E-09 | 1. 12E-08 |

|              |              |             |          |          |
|--------------|--------------|-------------|----------|----------|
| LINC01891    | -1.091220557 | 3.344325783 | 5.24E-09 | 1.24E-08 |
| LINC01559    | 2.109190408  | 4.167545523 | 5.36E-09 | 1.27E-08 |
| LINC02561    | 1.014549383  | 4.07260523  | 5.74E-09 | 1.36E-08 |
| LINC02068    | 1.088871447  | 5.333915982 | 5.82E-09 | 1.38E-08 |
| SLC2A9-AS1   | 1.170743329  | 4.879734254 | 6.21E-09 | 1.47E-08 |
| LINC02641    | 1.325153461  | 3.770543018 | 6.36E-09 | 1.50E-08 |
| LINC01014    | 3.379679118  | 3.528498333 | 6.43E-09 | 1.51E-08 |
| FOXF2-DT     | 1.348638041  | 3.530816107 | 7.22E-09 | 1.69E-08 |
| LINC00244    | 1.093756662  | 3.265279674 | 7.30E-09 | 1.71E-08 |
| BICRA-AS1    | 1.849504932  | 3.169543013 | 7.44E-09 | 1.74E-08 |
| LINC01107    | 1.257420902  | 3.563433868 | 9.02E-09 | 2.10E-08 |
| LINC02167    | 4.732700716  | 5.629378534 | 9.65E-09 | 2.25E-08 |
| OPCML-IT1    | 4.142422037  | 3.389364642 | 9.74E-09 | 2.27E-08 |
| LINC02576    | 1.029272013  | 5.209121855 | 9.75E-09 | 2.27E-08 |
| VCAN-AS1     | 1.154403371  | 3.945026638 | 1.01E-08 | 2.35E-08 |
| LINC00567    | 1.051611831  | 3.977208249 | 1.03E-08 | 2.38E-08 |
| MIMT1        | 1.773777133  | 4.965738345 | 1.10E-08 | 2.56E-08 |
| RSF1-IT1     | 1.19870162   | 3.495018783 | 1.15E-08 | 2.67E-08 |
| RABGAP1L-AS1 | 1.550398916  | 3.139139546 | 1.16E-08 | 2.68E-08 |
| ADARB2-AS1   | 3.39066824   | 5.440798778 | 1.27E-08 | 2.93E-08 |
| LINC02579    | 1.222309046  | 3.492840459 | 1.28E-08 | 2.94E-08 |
| LINC00709    | 4.084429367  | 3.502658538 | 1.31E-08 | 3.01E-08 |
| LINC02365    | 1.421043014  | 3.150216696 | 1.31E-08 | 3.01E-08 |
| DLGAP1-AS3   | 2.212886931  | 3.340768386 | 1.33E-08 | 3.06E-08 |
| LINC02437    | 2.346713651  | 4.890540009 | 1.40E-08 | 3.20E-08 |
| LINC01843    | 1.235540682  | 7.174089881 | 1.45E-08 | 3.32E-08 |
| POTEF-AS1    | 2.417539202  | 3.995804073 | 1.49E-08 | 3.40E-08 |
| SPATA3-AS1   | 1.227554428  | 4.620252892 | 1.52E-08 | 3.48E-08 |
| LINC02588    | 2.626005497  | 4.448860168 | 1.54E-08 | 3.52E-08 |
| MGC32805     | 1.852216134  | 5.292645525 | 1.59E-08 | 3.64E-08 |
| LINC01993    | 1.056501358  | 4.236963535 | 1.64E-08 | 3.74E-08 |
| NAV2-AS3     | 1.234390414  | 3.574641446 | 1.76E-08 | 3.99E-08 |
| LINC02837    | 2.474308581  | 2.893947397 | 1.77E-08 | 4.02E-08 |
| LINC01490    | 3.853988484  | 3.643178011 | 1.83E-08 | 4.16E-08 |
| LINC01501    | 2.155952924  | 3.150080363 | 1.89E-08 | 4.28E-08 |
| CASC20       | 2.239689846  | 3.166490113 | 1.89E-08 | 4.29E-08 |
| SIDT1-AS1    | 1.050011609  | 4.12311792  | 1.94E-08 | 4.40E-08 |
| NECTIN3-AS1  | -1.043160405 | 4.192563478 | 1.98E-08 | 4.46E-08 |
| LINC02308    | -1.133238961 | 4.395860993 | 2.11E-08 | 4.77E-08 |
| LINC00626    | 1.418425635  | 3.460802818 | 2.30E-08 | 5.18E-08 |
| LINC01726    | 1.463320662  | 2.70730803  | 2.55E-08 | 5.74E-08 |
| LINC02109    | 2.848363334  | 3.541238961 | 2.56E-08 | 5.75E-08 |
| SCGB1B2P     | 1.651627549  | 9.496819725 | 2.60E-08 | 5.84E-08 |
| KU-MEL-3     | 1.126520796  | 4.746638928 | 2.61E-08 | 5.86E-08 |
| GDF5-AS1     | -1.043632853 | 3.003392901 | 2.66E-08 | 5.97E-08 |
| PDE6B-AS1    | 1.487092691  | 4.665395575 | 2.75E-08 | 6.17E-08 |
| LINC00351    | 2.907681014  | 2.773074361 | 2.78E-08 | 6.23E-08 |
| LINC02783    | 1.878650499  | 3.534550369 | 2.95E-08 | 6.58E-08 |
| ELFN2        | 1.902038612  | 3.139086051 | 3.07E-08 | 6.83E-08 |
| PPM1B-DT     | 1.167450292  | 2.833641891 | 3.24E-08 | 7.21E-08 |
| LINC02473    | 1.475544076  | 6.087032783 | 3.52E-08 | 7.82E-08 |

|              |               |              |           |           |
|--------------|---------------|--------------|-----------|-----------|
| LINC02181    | 1. 975583581  | 3. 443451996 | 3. 72E-08 | 8. 24E-08 |
| LINC01603    | 1. 665044032  | 3. 478669332 | 4. 04E-08 | 8. 91E-08 |
| FILNC1       | -1. 159380377 | 4. 109958925 | 4. 05E-08 | 8. 93E-08 |
| DISC1FP1     | -1. 132690276 | 3. 479642966 | 4. 18E-08 | 9. 20E-08 |
| FLJ36000     | 3. 265391353  | 3. 066690636 | 4. 30E-08 | 9. 45E-08 |
| SH3PXD2A-AS1 | 1. 131192534  | 6. 215262657 | 4. 34E-08 | 9. 53E-08 |
| LING01-AS1   | 1. 363059257  | 3. 795374786 | 4. 39E-08 | 9. 64E-08 |
| LINC00861    | 1. 00449342   | 8. 191908725 | 4. 48E-08 | 9. 82E-08 |
| SALRNA1      | 1. 216485685  | 5. 665733184 | 4. 79E-08 | 1. 05E-07 |
| LINC01608    | 3. 980910035  | 3. 988600748 | 4. 98E-08 | 1. 09E-07 |
| PEX5L-AS2    | 2. 56610733   | 2. 818971612 | 5. 00E-08 | 1. 09E-07 |
| HHATL-AS1    | -1. 013544369 | 3. 493973484 | 5. 05E-08 | 1. 10E-07 |
| LINC01016    | 1. 685026411  | 9. 484260256 | 5. 31E-08 | 1. 16E-07 |
| LINC02842    | 1. 432428014  | 3. 371536223 | 5. 49E-08 | 1. 19E-07 |
| IGFL2-AS1    | 1. 574489884  | 5. 350558669 | 5. 76E-08 | 1. 25E-07 |
| C12orf77     | 1. 323276932  | 2. 954771482 | 6. 19E-08 | 1. 34E-07 |
| LUNAR1       | 1. 210185234  | 4. 54879012  | 6. 35E-08 | 1. 37E-07 |
| FOXP1-IT1    | 1. 161947251  | 4. 567646347 | 7. 17E-08 | 1. 55E-07 |
| SLC25A48-AS1 | 2. 004036116  | 3. 031339922 | 7. 37E-08 | 1. 59E-07 |
| LINC01925    | 3. 062803693  | 3. 073828925 | 7. 75E-08 | 1. 67E-07 |
| LINC02432    | 1. 788775404  | 7. 486803465 | 8. 21E-08 | 1. 76E-07 |
| LINC00355    | 3. 017526724  | 4. 598392337 | 8. 35E-08 | 1. 79E-07 |
| LARGE-AS1    | 1. 278846893  | 3. 597943369 | 9. 01E-08 | 1. 92E-07 |
| CACNA2D3-AS1 | 2. 35005482   | 2. 959293803 | 9. 17E-08 | 1. 95E-07 |
| LINC00707    | 2. 251317965  | 8. 116280619 | 1. 01E-07 | 2. 15E-07 |
| LINC00856    | 1. 06827476   | 4. 52799721  | 1. 03E-07 | 2. 18E-07 |
| LINC00602    | 1. 965422789  | 3. 53462464  | 1. 08E-07 | 2. 28E-07 |
| KCNAB1-AS2   | 1. 728724524  | 2. 893884264 | 1. 08E-07 | 2. 29E-07 |
| PCSK6-AS1    | 1. 498252775  | 2. 808342556 | 1. 10E-07 | 2. 33E-07 |
| BZW1-AS1     | 1. 236844309  | 3. 082410947 | 1. 10E-07 | 2. 34E-07 |
| LINC02672    | 3. 29828776   | 3. 333662731 | 1. 12E-07 | 2. 37E-07 |
| LINC01975    | 1. 365167433  | 2. 925096135 | 1. 14E-07 | 2. 41E-07 |
| CASC9        | 2. 687812202  | 5. 904913467 | 1. 21E-07 | 2. 55E-07 |
| LINC01623    | 1. 253554669  | 3. 816810565 | 1. 24E-07 | 2. 61E-07 |
| PANTR1       | -1. 430468307 | 3. 962065585 | 1. 47E-07 | 3. 09E-07 |
| LINC02616    | 3. 697391474  | 4. 339213409 | 1. 81E-07 | 3. 79E-07 |
| SHANK2-AS1   | 1. 364725562  | 4. 107138618 | 1. 90E-07 | 3. 96E-07 |
| ARLNC1       | 1. 024158     | 5. 15449526  | 2. 01E-07 | 4. 19E-07 |
| LINC01524    | -1. 057599029 | 3. 771331276 | 2. 05E-07 | 4. 27E-07 |
| IATPR        | 1. 213695725  | 3. 407765471 | 2. 08E-07 | 4. 33E-07 |
| LINC00092    | -1. 051260267 | 6. 465322981 | 2. 18E-07 | 4. 52E-07 |
| MIR4290HG    | 1. 37075584   | 2. 902250891 | 2. 46E-07 | 5. 09E-07 |
| RUNX2-AS1    | 1. 75435139   | 2. 721890657 | 2. 63E-07 | 5. 42E-07 |
| LINC01980    | 3. 306114981  | 5. 33674256  | 2. 67E-07 | 5. 51E-07 |
| LINC02820    | 2. 996626324  | 4. 620061229 | 3. 00E-07 | 6. 17E-07 |
| ANKRD44-AS1  | 1. 106581084  | 4. 307893347 | 3. 23E-07 | 6. 63E-07 |
| LINC01800    | 1. 0697382    | 3. 487829923 | 3. 29E-07 | 6. 76E-07 |
| LEMD1-DT     | 1. 620197675  | 3. 974894267 | 3. 34E-07 | 6. 84E-07 |
| LINC02492    | 1. 982228889  | 4. 101329872 | 3. 36E-07 | 6. 87E-07 |
| LINC02688    | 1. 132162258  | 5. 537847397 | 3. 49E-07 | 7. 14E-07 |
| LINC02287    | 2. 148393862  | 3. 341474928 | 3. 53E-07 | 7. 21E-07 |

|              |               |              |           |           |
|--------------|---------------|--------------|-----------|-----------|
| LINC02141    | 2. 804684236  | 3. 336540009 | 3. 57E-07 | 7. 29E-07 |
| GLIS3-AS1    | 1. 646958694  | 3. 345638657 | 3. 60E-07 | 7. 34E-07 |
| LINC01971    | 1. 446881872  | 3. 863605391 | 3. 61E-07 | 7. 36E-07 |
| LINC01976    | 1. 498868468  | 3. 150343861 | 3. 74E-07 | 7. 62E-07 |
| CXXC5-AS1    | 1. 015494633  | 3. 133994795 | 3. 80E-07 | 7. 74E-07 |
| THRA1/BTR    | 1. 446561817  | 3. 434022798 | 3. 86E-07 | 7. 85E-07 |
| LINC01441    | 3. 057059397  | 3. 085969656 | 3. 92E-07 | 7. 96E-07 |
| LINC02152    | 1. 919073113  | 2. 905831806 | 3. 94E-07 | 8. 00E-07 |
| SATB2-AS1    | 1. 07021082   | 4. 732464154 | 4. 01E-07 | 8. 14E-07 |
| ELOVL2-AS1   | 1. 348138992  | 6. 760670213 | 4. 04E-07 | 8. 19E-07 |
| MIR3681HG    | 1. 083802651  | 3. 876032123 | 4. 34E-07 | 8. 78E-07 |
| SAMMSON      | 1. 315544904  | 3. 672725195 | 4. 43E-07 | 8. 95E-07 |
| LINC00488    | 2. 198611731  | 2. 815085784 | 4. 47E-07 | 9. 03E-07 |
| SND1-IT1     | 1. 095254977  | 4. 070314766 | 4. 52E-07 | 9. 10E-07 |
| LINC02570    | 2. 357907513  | 3. 892043992 | 4. 92E-07 | 9. 89E-07 |
| LINC02293    | 2. 621041287  | 3. 450373133 | 5. 07E-07 | 1. 02E-06 |
| SHANK2-AS2   | 1. 456292111  | 3. 390750576 | 5. 25E-07 | 1. 05E-06 |
| LINC01460    | 1. 346412513  | 3. 900414322 | 5. 80E-07 | 1. 16E-06 |
| LINC01639    | 3. 339672916  | 5. 851013726 | 5. 82E-07 | 1. 17E-06 |
| LINC01587    | 1. 322564527  | 4. 808493954 | 5. 89E-07 | 1. 18E-06 |
| LSAMP-AS1    | 2. 445342137  | 3. 187879799 | 5. 92E-07 | 1. 18E-06 |
| LINC00434    | 1. 460757952  | 2. 931150591 | 6. 41E-07 | 1. 28E-06 |
| LINC01693    | 1. 470479978  | 3. 214234611 | 6. 66E-07 | 1. 32E-06 |
| MAST4-IT1    | 1. 971434413  | 2. 699605874 | 7. 18E-07 | 1. 42E-06 |
| LINC02422    | 1. 285415004  | 4. 381333223 | 8. 53E-07 | 1. 68E-06 |
| LINC01093    | -1. 033380232 | 4. 255995204 | 9. 62E-07 | 1. 89E-06 |
| FABP6-AS1    | 1. 603999841  | 2. 816751051 | 9. 67E-07 | 1. 89E-06 |
| LINC02726    | 2. 290018212  | 2. 863931605 | 1. 00E-06 | 1. 96E-06 |
| DPP10-AS1    | 2. 416283838  | 5. 649750113 | 1. 16E-06 | 2. 27E-06 |
| LINC02404    | 1. 763097022  | 2. 60721721  | 1. 19E-06 | 2. 32E-06 |
| LINC01206    | 1. 752651331  | 3. 334823317 | 1. 48E-06 | 2. 88E-06 |
| PTPRJ-AS1    | 1. 376310936  | 2. 884352598 | 1. 58E-06 | 3. 06E-06 |
| ITPK1-AS1    | 1. 146956469  | 3. 498829286 | 1. 63E-06 | 3. 15E-06 |
| LINC01143    | 1. 205864363  | 5. 075870705 | 1. 70E-06 | 3. 27E-06 |
| SOX1-OT      | 3. 188962559  | 4. 014565264 | 1. 70E-06 | 3. 28E-06 |
| LINC00404    | 2. 986718125  | 3. 368307324 | 1. 76E-06 | 3. 39E-06 |
| HOTTIP       | 1. 943157732  | 3. 702628096 | 1. 80E-06 | 3. 47E-06 |
| SLC1A2-AS1   | 1. 467599542  | 2. 76038494  | 1. 81E-06 | 3. 49E-06 |
| LINC01194    | 3. 318759348  | 4. 177388157 | 1. 90E-06 | 3. 65E-06 |
| GS1-594A7. 3 | 2. 286681801  | 4. 764043412 | 2. 09E-06 | 4. 02E-06 |
| C5orf17      | 1. 720459724  | 6. 145336313 | 2. 14E-06 | 4. 11E-06 |
| LINC00393    | 2. 664481686  | 5. 629828528 | 2. 34E-06 | 4. 48E-06 |
| LINC01198    | -1. 399272321 | 6. 819949137 | 2. 35E-06 | 4. 50E-06 |
| ZIM2-AS1     | 1. 112859112  | 6. 334633505 | 2. 39E-06 | 4. 57E-06 |
| LINC01102    | 1. 124959586  | 3. 847848047 | 2. 43E-06 | 4. 65E-06 |
| LINC02267    | 2. 089495419  | 2. 944027583 | 2. 61E-06 | 4. 98E-06 |
| ABCC5-AS1    | 1. 138302602  | 2. 958430082 | 2. 71E-06 | 5. 17E-06 |
| G2E3-AS1     | 2. 316327785  | 3. 358791022 | 2. 92E-06 | 5. 55E-06 |
| IFNG-AS1     | 1. 074655953  | 5. 653650787 | 3. 02E-06 | 5. 75E-06 |
| LINC01866    | 2. 384069788  | 2. 951020034 | 3. 39E-06 | 6. 43E-06 |
| LINC01838    | 1. 226615465  | 2. 959471001 | 3. 53E-06 | 6. 68E-06 |

|              |               |              |           |           |
|--------------|---------------|--------------|-----------|-----------|
| PCAT18       | 1. 226229767  | 9. 038647639 | 3. 55E-06 | 6. 71E-06 |
| C21orf91-OT1 | 1. 560200803  | 3. 476625221 | 4. 38E-06 | 8. 22E-06 |
| LINC01168    | 1. 696013244  | 3. 185209724 | 4. 52E-06 | 8. 49E-06 |
| KIRREL3-AS1  | 2. 046496565  | 5. 777891653 | 4. 73E-06 | 8. 86E-06 |
| LINC02115    | 1. 537581292  | 5. 116078798 | 4. 75E-06 | 8. 88E-06 |
| LINC02306    | 1. 703724936  | 6. 352990274 | 4. 96E-06 | 9. 26E-06 |
| SIRPG-AS1    | 1. 064228194  | 3. 905778166 | 5. 01E-06 | 9. 33E-06 |
| CHN2-AS1     | 1. 73150898   | 2. 839587396 | 5. 31E-06 | 9. 88E-06 |
| MTUS2-AS1    | 1. 038480881  | 3. 166988434 | 5. 63E-06 | 1. 04E-05 |
| LINC02474    | 1. 896892539  | 3. 045399002 | 5. 76E-06 | 1. 07E-05 |
| MIR2052HG    | 1. 387263196  | 6. 595151712 | 5. 78E-06 | 1. 07E-05 |
| LINC02617    | 2. 029634982  | 3. 254746259 | 6. 05E-06 | 1. 12E-05 |
| LINC01856    | 1. 348193205  | 4. 771411709 | 6. 11E-06 | 1. 13E-05 |
| EGFR-AS1     | -1. 004805566 | 3. 806766955 | 6. 47E-06 | 1. 19E-05 |
| SCHLAP1      | 2. 452756569  | 3. 471001543 | 6. 93E-06 | 1. 27E-05 |
| PHACTR2-AS1  | 1. 170422097  | 3. 13039008  | 7. 48E-06 | 1. 37E-05 |
| NCF4-AS1     | 1. 087374565  | 3. 325660062 | 7. 60E-06 | 1. 39E-05 |
| SHANK2-AS3   | 1. 450496404  | 3. 248208111 | 7. 93E-06 | 1. 45E-05 |
| TMEM108-AS1  | 1. 751706616  | 2. 796999757 | 8. 12E-06 | 1. 48E-05 |
| ASTN2-AS1    | 1. 352043025  | 2. 889512657 | 8. 86E-06 | 1. 61E-05 |
| LINC01611    | 1. 602285113  | 3. 926325825 | 8. 98E-06 | 1. 64E-05 |
| SPATA13-AS1  | 1. 213408692  | 2. 883096411 | 9. 19E-06 | 1. 67E-05 |
| LINC02836    | 1. 846310706  | 2. 891480605 | 9. 40E-06 | 1. 71E-05 |
| LINC02050    | 2. 460228148  | 3. 173225476 | 1. 00E-05 | 1. 82E-05 |
| LINC01777    | -1. 225075315 | 2. 896771136 | 1. 12E-05 | 2. 03E-05 |
| LINC00501    | 1. 24798977   | 3. 482351186 | 1. 13E-05 | 2. 05E-05 |
| KCNIP4-IT1   | 2. 338557699  | 2. 873760531 | 1. 29E-05 | 2. 31E-05 |
| ARHGEF3-AS1  | 1. 695106228  | 2. 682667505 | 1. 35E-05 | 2. 42E-05 |
| LINC02323    | 1. 193662708  | 4. 173278557 | 1. 51E-05 | 2. 70E-05 |
| LINC02470    | 1. 186220747  | 3. 116562135 | 1. 57E-05 | 2. 80E-05 |
| LINC02669    | 1. 293104607  | 3. 596247906 | 1. 66E-05 | 2. 95E-05 |
| PCBP3-AS1    | 1. 980229799  | 3. 795092282 | 1. 74E-05 | 3. 09E-05 |
| MIR4432HG    | 1. 239439564  | 3. 423690165 | 1. 75E-05 | 3. 10E-05 |
| OSTM1-AS1    | 1. 882873862  | 3. 004461637 | 1. 77E-05 | 3. 13E-05 |
| LINC00491    | 1. 939109757  | 3. 780317342 | 1. 81E-05 | 3. 20E-05 |
| BTBD9-AS1    | 1. 242225033  | 3. 154618597 | 2. 02E-05 | 3. 57E-05 |
| LINC01761    | -1. 07194483  | 3. 711692824 | 2. 41E-05 | 4. 23E-05 |
| LINC01954    | 1. 134606776  | 3. 700102446 | 2. 72E-05 | 4. 75E-05 |
| LINC02233    | 1. 945742062  | 4. 244710515 | 2. 81E-05 | 4. 90E-05 |
| LINC01115    | 1. 480313927  | 4. 811999608 | 2. 94E-05 | 5. 12E-05 |
| ENOX1-AS1    | 1. 032144791  | 3. 024374101 | 3. 11E-05 | 5. 41E-05 |
| LINC01539    | 1. 235720777  | 3. 203443715 | 3. 12E-05 | 5. 43E-05 |
| LINC02189    | -1. 159593404 | 3. 093126172 | 3. 16E-05 | 5. 48E-05 |
| ROCR         | -1. 074663017 | 8. 659099855 | 3. 33E-05 | 5. 77E-05 |
| LINC01695    | 1. 091501923  | 5. 252109331 | 3. 85E-05 | 6. 65E-05 |
| NFIA-AS1     | 1. 095425991  | 3. 577574459 | 4. 09E-05 | 7. 05E-05 |
| LINC01910    | 1. 324088259  | 4. 424394426 | 4. 95E-05 | 8. 51E-05 |
| LINC02735    | 1. 673537374  | 2. 836498656 | 5. 61E-05 | 9. 60E-05 |
| FAM131B-AS1  | 1. 307505524  | 3. 266886247 | 6. 33E-05 | 1. 08E-04 |
| FENDRR       | 1. 212230975  | 4. 579549789 | 6. 50E-05 | 1. 11E-04 |
| LINC02864    | 1. 758879864  | 5. 108477843 | 6. 69E-05 | 1. 14E-04 |

|                |               |              |           |           |
|----------------|---------------|--------------|-----------|-----------|
| LINC02555      | 1. 219390832  | 2. 973254263 | 7. 13E-05 | 1. 21E-04 |
| MKX-AS1        | 1. 856827239  | 5. 207828677 | 7. 31E-05 | 1. 24E-04 |
| LINC01249      | -1. 331094766 | 3. 797824614 | 8. 25E-05 | 1. 39E-04 |
| SNHG27         | 1. 903720114  | 3. 922286414 | 9. 00E-05 | 1. 51E-04 |
| LINC01804      | 1. 827906179  | 2. 967871343 | 9. 53E-05 | 1. 60E-04 |
| MACROD2-AS1    | 1. 274875568  | 2. 814440214 | 9. 82E-05 | 1. 64E-04 |
| ADGRD1-AS1     | 2. 01326534   | 3. 479615325 | 1. 05E-04 | 1. 75E-04 |
| NEUROG2-AS1    | -1. 056461911 | 4. 932471505 | 1. 19E-04 | 1. 97E-04 |
| LINC01324      | 1. 905447791  | 2. 941756795 | 1. 30E-04 | 2. 14E-04 |
| LINC02477      | 1. 518605747  | 3. 276944011 | 1. 40E-04 | 2. 30E-04 |
| LINC01748      | 1. 488064492  | 4. 320737845 | 1. 41E-04 | 2. 32E-04 |
| LINC01456      | 2. 17583014   | 4. 628256557 | 1. 43E-04 | 2. 36E-04 |
| MIR4500HG      | 1. 337030979  | 3. 842732789 | 1. 52E-04 | 2. 49E-04 |
| LINC01840      | 1. 28443788   | 4. 082152176 | 1. 53E-04 | 2. 50E-04 |
| CTD-2350J17. 1 | 1. 588154949  | 2. 817235499 | 1. 67E-04 | 2. 73E-04 |
| E2F3-IT1       | 1. 251658193  | 2. 747563004 | 1. 75E-04 | 2. 85E-04 |
| LINC01111      | 2. 151032322  | 3. 001657298 | 1. 77E-04 | 2. 89E-04 |
| F11-AS1        | 1. 684769802  | 3. 558873589 | 2. 04E-04 | 3. 30E-04 |
| LPP-AS1        | 1. 453076229  | 2. 695053723 | 2. 67E-04 | 4. 27E-04 |
| LINC01257      | 1. 599048054  | 3. 90075756  | 3. 15E-04 | 5. 03E-04 |
| LINC02765      | 1. 03285382   | 4. 785768897 | 3. 24E-04 | 5. 16E-04 |
| ATP13A4-AS1    | -1. 124997089 | 2. 908451917 | 3. 54E-04 | 5. 60E-04 |
| LINC02251      | 1. 373609804  | 4. 21804548  | 3. 70E-04 | 5. 85E-04 |
| LINC01913      | 1. 815630967  | 3. 423202934 | 3. 76E-04 | 5. 95E-04 |
| RC3H1-IT1      | 1. 070260827  | 2. 878584276 | 3. 94E-04 | 6. 21E-04 |
| MYO16-AS1      | 1. 444123403  | 2. 94245405  | 3. 97E-04 | 6. 25E-04 |
| FAM167A-AS1    | 1. 107482753  | 2. 964584188 | 4. 01E-04 | 6. 32E-04 |
| LINC01950      | 1. 576039192  | 3. 482922901 | 4. 18E-04 | 6. 56E-04 |
| LINC02562      | 1. 432155866  | 6. 92151844  | 4. 42E-04 | 6. 92E-04 |
| LINC01602      | 1. 061852724  | 2. 807682194 | 4. 67E-04 | 7. 31E-04 |
| LINC01507      | 1. 361514838  | 3. 058702295 | 4. 78E-04 | 7. 47E-04 |
| KIF25-AS1      | 1. 25915172   | 5. 781903852 | 5. 22E-04 | 8. 12E-04 |
| LINC02327      | 1. 691124616  | 3. 301865305 | 5. 91E-04 | 9. 15E-04 |
| LINC02866      | 1. 591548235  | 3. 928108067 | 5. 93E-04 | 9. 18E-04 |
| LINC01630      | 1. 159752795  | 3. 357588641 | 8. 63E-04 | 1. 32E-03 |
| LINC01098      | 1. 201611351  | 3. 120921918 | 1. 01E-03 | 1. 54E-03 |
| PDE4B-AS1      | 1. 340166865  | 2. 600702679 | 1. 17E-03 | 1. 76E-03 |
| LINC00348      | -1. 081109418 | 2. 974998135 | 1. 17E-03 | 1. 77E-03 |
| PTPRT-AS1      | 1. 193390372  | 2. 650151978 | 1. 18E-03 | 1. 77E-03 |
| LINC02041      | 1. 261647783  | 3. 545577345 | 1. 20E-03 | 1. 80E-03 |
| RIC3-DT        | 1. 603239416  | 3. 381083724 | 1. 23E-03 | 1. 85E-03 |
| JAKMIP2-AS1    | 1. 025420128  | 3. 260118582 | 1. 34E-03 | 2. 00E-03 |
| LINC01036      | 1. 896983938  | 3. 261339527 | 1. 36E-03 | 2. 03E-03 |
| KCND3-AS1      | 1. 110044783  | 2. 93887211  | 1. 44E-03 | 2. 15E-03 |
| LINC01193      | 1. 490422047  | 2. 880047954 | 1. 63E-03 | 2. 41E-03 |
| CACNA1C-IT3    | 1. 207050431  | 2. 74106523  | 1. 75E-03 | 2. 59E-03 |
| EVX1-AS        | 1. 005141568  | 2. 91650523  | 1. 85E-03 | 2. 72E-03 |
| PCAT14         | 1. 083612035  | 6. 824198242 | 1. 85E-03 | 2. 73E-03 |
| CACNA1C-AS4    | 1. 305629313  | 2. 912949599 | 1. 95E-03 | 2. 86E-03 |
| MAGI1-AS1      | 1. 101735995  | 3. 231192185 | 2. 02E-03 | 2. 97E-03 |
| LINC00114      | 1. 319182655  | 2. 862549881 | 2. 59E-03 | 3. 77E-03 |

|                |              |              |           |           |
|----------------|--------------|--------------|-----------|-----------|
| ARHGAP15-AS1   | 1. 013420983 | 2. 903436098 | 3. 08E-03 | 4. 46E-03 |
| LINC01447      | 1. 021292952 | 3. 445766222 | 3. 80E-03 | 5. 44E-03 |
| LINC02527      | 1. 597757079 | 2. 766997556 | 4. 18E-03 | 5. 97E-03 |
| LINC01151      | 1. 226835906 | 3. 205144476 | 4. 23E-03 | 6. 04E-03 |
| LINC01511      | 1. 43617499  | 7. 101942214 | 4. 59E-03 | 6. 54E-03 |
| LINC01322      | 1. 236894041 | 3. 095724709 | 4. 80E-03 | 6. 82E-03 |
| LINC00871      | 1. 0787869   | 3. 075856525 | 5. 18E-03 | 7. 34E-03 |
| SOX5-AS1       | 1. 292297169 | 2. 609391076 | 5. 28E-03 | 7. 47E-03 |
| LINC02302      | 1. 066890901 | 5. 882991385 | 5. 96E-03 | 8. 40E-03 |
| LINC02434      | 1. 432714372 | 3. 1701919   | 7. 47E-03 | 1. 04E-02 |
| LINC01793      | 1. 14560017  | 3. 03406095  | 8. 07E-03 | 1. 12E-02 |
| MAGEA10-MAGEA5 | 1. 032520627 | 2. 950286225 | 8. 11E-03 | 1. 13E-02 |
| LINC01749      | 1. 158966805 | 3. 374176266 | 1. 24E-02 | 1. 68E-02 |
| LINC02476      | 1. 239633376 | 2. 775725838 | 1. 71E-02 | 2. 28E-02 |

---
