# Supplementary material for: Comprehensive analysis of cuproptosis-related long non-coding RNA signature and personalized therapeutic strategy of breast cancer patients
Source: PubMed Central journal article supplement (PMC9815178; doi:10.3389/fonc.2022.1081089), 2022-12-22
Supplement: Table_3.pdf [file Table_3.pdf]

LncRNAs associated with BC patient prognosis

| id           | HR          | HR. 95L     | HR. 95H     | p-value  |
|--------------|-------------|-------------|-------------|----------|
| TNFRSF14-AS1 | 0.727595231 | 0.620724977 | 0.852865342 | 8.72E-05 |
| CAMTA1-AS1   | 0.788076757 | 0.644928029 | 0.962998889 | 1.99E-02 |
| RERE-AS1     | 0.728733767 | 0.615479619 | 0.862827763 | 2.41E-04 |
| LINC01778    | 0.861307232 | 0.748870417 | 0.990625521 | 3.64E-02 |
| PIK3CD-AS2   | 0.823943115 | 0.711269435 | 0.954465669 | 9.85E-03 |
| LINC01786    | 0.825163467 | 0.692861597 | 0.982728369 | 3.11E-02 |
| PRKCZ-AS1    | 0.745563746 | 0.565961489 | 0.982160996 | 3.68E-02 |
| NFIA-AS2     | 0.858941957 | 0.743866663 | 0.991819307 | 3.83E-02 |
| PKN2-AS1     | 1.216031616 | 1.032355057 | 1.432387899 | 1.92E-02 |
| VAV3-AS1     | 0.789626249 | 0.674258906 | 0.924733226 | 3.38E-03 |
| LRIG2-DT     | 0.771133759 | 0.622587006 | 0.95512317  | 1.73E-02 |
| LINC02609    | 0.791325189 | 0.65805482  | 0.951585697 | 1.29E-02 |
| LINC00623    | 0.847325534 | 0.731373678 | 0.981660377 | 2.73E-02 |
| LINC01765    | 0.71223177  | 0.562238895 | 0.902239419 | 4.91E-03 |
| LINC00624    | 1.247325206 | 1.091481047 | 1.425421151 | 1.17E-03 |
| LINC01633    | 1.209650524 | 1.06036248  | 1.379956776 | 4.62E-03 |
| KIAA1614-AS1 | 1.253942653 | 1.036302824 | 1.517290256 | 2.00E-02 |
| MIR205HG     | 0.915508984 | 0.84931706  | 0.986859607 | 2.11E-02 |
| LINC01353    | 0.788855569 | 0.652058427 | 0.954351763 | 1.47E-02 |
| LINC01341    | 0.85846128  | 0.743969729 | 0.990572251 | 3.66E-02 |
| IPO9-AS1     | 0.76127065  | 0.596491607 | 0.971569417 | 2.84E-02 |
| KCNH1-IT1    | 0.859941908 | 0.774063111 | 0.95534857  | 4.94E-03 |
| LINC01344    | 0.886177369 | 0.796732473 | 0.985663765 | 2.60E-02 |
| RABGAP1L-IT1 | 0.723572922 | 0.551560886 | 0.949229335 | 1.95E-02 |
| LINC01036    | 1.164631052 | 1.0314773   | 1.314973666 | 1.39E-02 |
| LINC00582    | 0.858421696 | 0.7470132   | 0.986445498 | 3.14E-02 |
| PINK1-AS     | 1.473517462 | 1.054466352 | 2.059101939 | 2.32E-02 |
| ATP1A1-AS1   | 0.696905082 | 0.520637716 | 0.932849617 | 1.52E-02 |
| THBS3-AS1    | 0.794992151 | 0.654338704 | 0.965879775 | 2.09E-02 |
| CHRM3-AS2    | 0.860452681 | 0.764190034 | 0.968841235 | 1.30E-02 |
| LRRC8C-DT    | 0.809775534 | 0.685921878 | 0.955992855 | 1.27E-02 |
| GORAB-AS1    | 1.201406723 | 1.020130863 | 1.414895055 | 2.79E-02 |
| MRPL20-DT    | 1.339704546 | 1.084967099 | 1.654251334 | 6.57E-03 |
| PEF1-AS1     | 0.759633064 | 0.630138819 | 0.915738524 | 3.94E-03 |
| CNIH3-AS2    | 0.849538029 | 0.727182974 | 0.992480421 | 3.99E-02 |
| LAMTOR5-AS1  | 1.478264779 | 1.0889552   | 2.006755427 | 1.22E-02 |
| AKT3-IT1     | 0.746077563 | 0.575387889 | 0.967402582 | 2.71E-02 |
| TTLL10-AS1   | 0.818528374 | 0.681497516 | 0.98311246  | 3.22E-02 |
| ECE1-AS1     | 0.713458921 | 0.576412507 | 0.88308915  | 1.92E-03 |
| TDRKH-AS1    | 1.344915987 | 1.056798392 | 1.711583804 | 1.60E-02 |
| C2CD4D-AS1   | 1.285441644 | 1.058703515 | 1.560739334 | 1.12E-02 |
| TFAP2E-AS1   | 0.79531588  | 0.655616128 | 0.964783082 | 2.01E-02 |
| LINC01871    | 0.872571941 | 0.765963497 | 0.994018376 | 4.03E-02 |
| ID2-AS1      | 1.226587909 | 1.005040509 | 1.496972395 | 4.45E-02 |
| FLJ31356     | 1.234436767 | 1.044695393 | 1.458639658 | 1.34E-02 |
| PPP1R21-DT   | 1.223949535 | 1.021558857 | 1.466437742 | 2.84E-02 |
| RASGRP3-AS1  | 1.282440197 | 1.013829749 | 1.622217992 | 3.80E-02 |
| LINC02245    | 0.834828617 | 0.710741015 | 0.980580554 | 2.79E-02 |
| PGM5P4-AS1   | 0.70760161  | 0.560401011 | 0.893467407 | 3.65E-03 |

|              |             |             |             |          |
|--------------|-------------|-------------|-------------|----------|
| C2orf91      | 0.82452405  | 0.702339834 | 0.967964332 | 1.84E-02 |
| FSIP2-AS1    | 0.82303021  | 0.695190881 | 0.974378038 | 2.37E-02 |
| ANKRD44-AS1  | 0.763437431 | 0.657596171 | 0.886314029 | 3.93E-04 |
| ANKRD44-IT1  | 0.737785091 | 0.589217169 | 0.92381361  | 8.03E-03 |
| LINC01854    | 1.218401576 | 1.041738668 | 1.425023805 | 1.35E-02 |
| KIAA2012-AS1 | 0.797140709 | 0.697260943 | 0.911327841 | 9.02E-04 |
| C2orf49-DT   | 1.517069434 | 1.123057187 | 2.04931654  | 6.60E-03 |
| LINC01889    | 1.134045044 | 1.005194146 | 1.279412707 | 4.09E-02 |
| LINC01827    | 0.800858119 | 0.650561648 | 0.985876942 | 3.63E-02 |
| LINC01117    | 0.901322238 | 0.817760915 | 0.993422113 | 3.64E-02 |
| CATIP-AS1    | 0.783145942 | 0.657193521 | 0.933237391 | 6.29E-03 |
| SNED1-AS1    | 1.196159906 | 1.001164966 | 1.429133628 | 4.85E-02 |
| LINC01918    | 0.86379971  | 0.751797253 | 0.992488249 | 3.88E-02 |
| LINC00471    | 1.322626351 | 1.020689615 | 1.713880927 | 3.44E-02 |
| NIFK-AS1     | 0.586508595 | 0.363221676 | 0.947058929 | 2.91E-02 |
| HDAC4-AS1    | 0.778132757 | 0.632078893 | 0.957935148 | 1.80E-02 |
| BOLA3-AS1    | 1.199548325 | 1.005644437 | 1.430839899 | 4.31E-02 |
| DGUOK-AS1    | 1.38497534  | 1.082164829 | 1.772518049 | 9.67E-03 |
| HOXD-AS2     | 0.817494554 | 0.704505594 | 0.948604741 | 7.93E-03 |
| TNS1-AS1     | 0.848027959 | 0.720111018 | 0.998667428 | 4.82E-02 |
| MFF-DT       | 1.730916787 | 1.268908716 | 2.361141417 | 5.34E-04 |
| LMCD1-AS1    | 1.290265895 | 1.037201592 | 1.605074744 | 2.21E-02 |
| LINC02084    | 0.799739603 | 0.686581735 | 0.931547403 | 4.09E-03 |
| SLC6A1-AS1   | 1.245050197 | 1.00883501  | 1.536574344 | 4.12E-02 |
| SRGAP3-AS2   | 0.860982261 | 0.763287286 | 0.971181452 | 1.49E-02 |
| FGD5-AS1     | 1.533338273 | 1.095804626 | 2.145570666 | 1.26E-02 |
| LINC01267    | 0.814037125 | 0.672725096 | 0.985033032 | 3.44E-02 |
| GOLGA4-AS1   | 1.536739186 | 1.177356422 | 2.005821926 | 1.57E-03 |
| ESRG         | 0.76835689  | 0.620399229 | 0.951600651 | 1.58E-02 |
| CYB561D2     | 0.825582924 | 0.705668703 | 0.965874159 | 1.67E-02 |
| FOXP1-AS1    | 0.82090201  | 0.682170129 | 0.987847579 | 3.67E-02 |
| LINC02018    | 0.781033992 | 0.638746957 | 0.955016834 | 1.60E-02 |
| SEMA3F-AS1   | 0.687821923 | 0.521889563 | 0.906511705 | 7.89E-03 |
| LINC01215    | 0.892941587 | 0.80623603  | 0.988971774 | 2.98E-02 |
| SAMMSON      | 1.226739616 | 1.070983077 | 1.405148334 | 3.18E-03 |
| SYNPR-AS1    | 0.885238397 | 0.806036837 | 0.972222339 | 1.08E-02 |
| SIDT1-AS1    | 0.845763563 | 0.725817087 | 0.985532053 | 3.18E-02 |
| LINC00881    | 0.791701644 | 0.648532924 | 0.96647598  | 2.17E-02 |
| STAG1-DT     | 1.28352472  | 1.06883364  | 1.541339685 | 7.52E-03 |
| NCK1-DT      | 1.489813357 | 1.081177924 | 2.052894153 | 1.48E-02 |
| TBL1XR1-AS1  | 0.823581217 | 0.680056471 | 0.997396612 | 4.70E-02 |
| ERICH6-AS1   | 0.744077101 | 0.58054082  | 0.953680971 | 1.96E-02 |
| OPA1-AS1     | 1.260137125 | 1.041322692 | 1.524931307 | 1.75E-02 |
| TPRG1-AS2    | 0.842464549 | 0.731626004 | 0.970094711 | 1.72E-02 |
| SIAH2-AS1    | 0.803636255 | 0.705112688 | 0.915926265 | 1.05E-03 |
| ACAP2-IT1    | 1.23835775  | 1.013198332 | 1.513553534 | 3.68E-02 |
| LINC00885    | 1.163382359 | 1.015602323 | 1.332665831 | 2.90E-02 |
| LINC02037    | 1.162199269 | 1.001678643 | 1.348443585 | 4.75E-02 |
| ATP13A5-AS1  | 1.189645442 | 1.032762216 | 1.370360239 | 1.61E-02 |
| PLCH1-AS1    | 1.244356614 | 1.009343785 | 1.534089183 | 4.07E-02 |
| TIPARP-AS1   | 0.766067975 | 0.620972789 | 0.945065793 | 1.29E-02 |

|              |             |             |             |          |
|--------------|-------------|-------------|-------------|----------|
| ARIH20S      | 0.714847622 | 0.516859313 | 0.988677401 | 4.25E-02 |
| SCAANT1      | 0.770890603 | 0.632141393 | 0.940093986 | 1.02E-02 |
| ZBTB20-AS1   | 0.826518513 | 0.694815842 | 0.983185487 | 3.14E-02 |
| MME-AS1      | 0.736433245 | 0.544684845 | 0.995683888 | 4.68E-02 |
| LINC02054    | 0.803572063 | 0.663155266 | 0.973720776 | 2.56E-02 |
| WNT5A-AS1    | 0.867752151 | 0.771430966 | 0.976100039 | 1.81E-02 |
| BSN-DT       | 1.150874337 | 1.005925166 | 1.316710012 | 4.08E-02 |
| LINC02043    | 1.186803466 | 1.026455075 | 1.372200791 | 2.07E-02 |
| SEMA3B-AS1   | 0.847767347 | 0.747791852 | 0.961108995 | 9.89E-03 |
| FGF12-AS2    | 1.198813108 | 1.013475007 | 1.418044705 | 3.43E-02 |
| ITPR1-DT     | 1.289153191 | 1.018474347 | 1.631770063 | 3.47E-02 |
| EGOT         | 0.865175632 | 0.777372799 | 0.962895635 | 7.99E-03 |
| ITGB5-AS1    | 0.800814024 | 0.665337317 | 0.963876644 | 1.88E-02 |
| THUMP3-AS1   | 1.513653951 | 1.113813238 | 2.057030932 | 8.08E-03 |
| LINC02482    | 0.79682044  | 0.642473179 | 0.988247966 | 3.87E-02 |
| LINC02265    | 0.79254478  | 0.672402198 | 0.934154038 | 5.57E-03 |
| LINC02428    | 0.873095122 | 0.767484244 | 0.993238751 | 3.91E-02 |
| FLJ20021     | 0.766387308 | 0.610535013 | 0.962024279 | 2.18E-02 |
| WDFY3-AS2    | 1.285403276 | 1.02245605  | 1.615973206 | 3.15E-02 |
| LNK1-AS2     | 1.268449221 | 1.065514886 | 1.510033737 | 7.51E-03 |
| LINC02263    | 0.775886155 | 0.610587766 | 0.985934143 | 3.79E-02 |
| UBA6-AS1     | 1.465690709 | 1.009627047 | 2.12776516  | 4.44E-02 |
| SLC7A11-AS1  | 1.263897531 | 1.098399105 | 1.454332003 | 1.07E-03 |
| LINC02466    | 1.147058778 | 1.002645359 | 1.312272409 | 4.57E-02 |
| LINC02267    | 1.228310834 | 1.056202391 | 1.428464392 | 7.59E-03 |
| HHIP-AS1     | 0.761387723 | 0.641426158 | 0.903784883 | 1.83E-03 |
| LINC02275    | 1.153717851 | 1.016456112 | 1.309515349 | 2.69E-02 |
| LINC01098    | 1.200798302 | 1.017623968 | 1.41694438  | 3.02E-02 |
| LINC02477    | 1.185103806 | 1.01050814  | 1.389866123 | 3.68E-02 |
| FAM160A1-DT  | 1.222809305 | 1.01714939  | 1.4700521   | 3.23E-02 |
| UNC5C-AS1    | 0.869985569 | 0.759614699 | 0.996393159 | 4.42E-02 |
| LINC02434    | 1.191685918 | 1.010490228 | 1.405372647 | 3.72E-02 |
| USP46-DT     | 1.404142991 | 1.042876399 | 1.890557253 | 2.53E-02 |
| SRD5A3-AS1   | 1.367712013 | 1.080076949 | 1.731947111 | 9.34E-03 |
| LEF1-AS1     | 0.76744885  | 0.631608784 | 0.932504032 | 7.74E-03 |
| MIR4458HG    | 0.866593274 | 0.760931793 | 0.986926699 | 3.09E-02 |
| PURPL        | 1.177391317 | 1.062324929 | 1.304921192 | 1.86E-03 |
| LINC01513    | 0.779396881 | 0.656318936 | 0.925555344 | 4.48E-03 |
| LINC02223    | 1.245089921 | 1.058087679 | 1.465142202 | 8.29E-03 |
| OSMR-AS1     | 0.837041133 | 0.701855027 | 0.998265783 | 4.78E-02 |
| MEF2C-AS1    | 0.830306902 | 0.713873044 | 0.965731312 | 1.59E-02 |
| LINC02062    | 0.784626804 | 0.627836499 | 0.980572527 | 3.30E-02 |
| SNHG18       | 0.862962917 | 0.75089531  | 0.99175609  | 3.78E-02 |
| LINC01950    | 1.192245334 | 1.035440186 | 1.372796764 | 1.45E-02 |
| LINC02208    | 1.169769127 | 1.025533953 | 1.334290111 | 1.95E-02 |
| ARHGAP26-AS1 | 0.76863513  | 0.635434635 | 0.929757258 | 6.73E-03 |
| LINC01411    | 0.922814405 | 0.852767581 | 0.998614915 | 4.61E-02 |
| LINC02227    | 0.79967912  | 0.646960047 | 0.98844851  | 3.87E-02 |
| LINC01574    | 1.194237225 | 1.049530178 | 1.358896178 | 7.07E-03 |
| LINC01863    | 0.851996267 | 0.766318354 | 0.947253365 | 3.06E-03 |
| LINC02234    | 1.273517461 | 1.076135769 | 1.507102328 | 4.89E-03 |

|             |              |              |              |           |
|-------------|--------------|--------------|--------------|-----------|
| PRR7-AS1    | 1. 219536456 | 1. 032260998 | 1. 440787912 | 1. 96E-02 |
| PP7080      | 1. 52560663  | 1. 093867575 | 2. 127748956 | 1. 28E-02 |
| SNHG4       | 1. 1905444   | 1. 023842757 | 1. 384388334 | 2. 34E-02 |
| LINC02236   | 1. 382700776 | 1. 166434617 | 1. 639064383 | 1. 88E-04 |
| ZNF474-AS1  | 0. 794788239 | 0. 663007502 | 0. 952761985 | 1. 30E-02 |
| P4HA2-AS1   | 1. 320866508 | 1. 064161705 | 1. 639495507 | 1. 16E-02 |
| FABP6-AS1   | 1. 222235551 | 1. 01944878  | 1. 465360272 | 3. 02E-02 |
| LINC00491   | 1. 177406149 | 1. 050011361 | 1. 320257372 | 5. 19E-03 |
| HCG18       | 1. 699074256 | 1. 140710162 | 2. 530750953 | 9. 12E-03 |
| ELOVL2-AS1  | 0. 892137489 | 0. 824573621 | 0. 965237401 | 4. 50E-03 |
| LINC01016   | 0. 918761292 | 0. 863854572 | 0. 97715789  | 7. 04E-03 |
| BTBD9-AS1   | 1. 259182872 | 1. 021679442 | 1. 55189724  | 3. 07E-02 |
| PTPRK-AS1   | 0. 800327104 | 0. 646394068 | 0. 990917934 | 4. 10E-02 |
| LINC00472   | 0. 892125737 | 0. 799990472 | 0. 994872261 | 4. 01E-02 |
| MLIP-IT1    | 1. 208208987 | 1. 031054823 | 1. 415801491 | 1. 94E-02 |
| C6orf99     | 1. 232557543 | 1. 028298888 | 1. 477389614 | 2. 37E-02 |
| STXBP5-AS1  | 1. 603510558 | 1. 290110571 | 1. 993043209 | 2. 08E-05 |
| LINC01010   | 0. 842299964 | 0. 731109612 | 0. 970400632 | 1. 75E-02 |
| TAGAP-AS1   | 1. 436499747 | 1. 056123518 | 1. 953873281 | 2. 10E-02 |
| LINC02532   | 1. 11554668  | 1. 024269787 | 1. 214957632 | 1. 21E-02 |
| LINC00602   | 1. 149321855 | 1. 005793368 | 1. 31333211  | 4. 09E-02 |
| MPC1-DT     | 1. 317052655 | 1. 060933686 | 1. 635001054 | 1. 26E-02 |
| SYNJ2-IT1   | 1. 309481498 | 1. 041956295 | 1. 645694549 | 2. 08E-02 |
| AFDN-DT     | 1. 224595227 | 1. 031184051 | 1. 454283033 | 2. 09E-02 |
| SDK1-AS1    | 1. 217452629 | 1. 019872043 | 1. 453310652 | 2. 94E-02 |
| PRKAR1B-AS1 | 0. 765336787 | 0. 618796082 | 0. 946580649 | 1. 37E-02 |
| LINC02888   | 1. 111108043 | 1. 015668347 | 1. 215515958 | 2. 15E-02 |
| SEC61G-DT   | 1. 251474863 | 1. 023354547 | 1. 530446448 | 2. 89E-02 |
| WEE2-AS1    | 0. 686588151 | 0. 538306217 | 0. 875715855 | 2. 45E-03 |
| WDR86-AS1   | 0. 835703211 | 0. 732174441 | 0. 953870851 | 7. 82E-03 |
| PRKAG2-AS1  | 0. 777672411 | 0. 651995189 | 0. 92757491  | 5. 18E-03 |
| SUGCT-AS1   | 1. 211672011 | 1. 045134378 | 1. 404746693 | 1. 09E-02 |
| PPP1R35-AS1 | 1. 344423151 | 1. 06853695  | 1. 691540576 | 1. 15E-02 |
| ST7-AS1     | 0. 720196911 | 0. 566563902 | 0. 915490007 | 7. 34E-03 |
| ST7-OT4     | 1. 299695741 | 1. 048062903 | 1. 611743927 | 1. 70E-02 |
| CRPPA-AS1   | 1. 319611991 | 1. 074969413 | 1. 619930563 | 8. 03E-03 |
| FKBP14-AS1  | 1. 40198111  | 1. 116860029 | 1. 759890213 | 3. 58E-03 |
| ELN-AS1     | 0. 879396217 | 0. 785787147 | 0. 984156726 | 2. 52E-02 |
| TP53TG1     | 0. 745789    | 0. 608907047 | 0. 913441937 | 4. 58E-03 |
| MNX1-AS1    | 1. 084362489 | 1. 003322217 | 1. 171948539 | 4. 10E-02 |
| LINC01456   | 1. 121333433 | 1. 029362225 | 1. 221522062 | 8. 72E-03 |
| LINC01283   | 1. 514378812 | 1. 21521308  | 1. 88719429  | 2. 19E-04 |
| ZNF674-AS1  | 1. 363438708 | 1. 024176064 | 1. 815083534 | 3. 37E-02 |
| USP27X-DT   | 1. 347551944 | 1. 013595377 | 1. 791539586 | 4. 01E-02 |
| LINC00630   | 1. 591823587 | 1. 220389879 | 2. 076305592 | 6. 06E-04 |
| FTX         | 1. 443731083 | 1. 095990796 | 1. 901803783 | 9. 00E-03 |
| FIRRE       | 1. 136995246 | 1. 019638776 | 1. 26785899  | 2. 09E-02 |
| RAP2C-AS1   | 1. 276125142 | 1. 002567202 | 1. 624325406 | 4. 76E-02 |
| LINC01278   | 1. 541884549 | 1. 110602495 | 2. 140647056 | 9. 69E-03 |
| UXT-AS1     | 1. 554290902 | 1. 175057658 | 2. 055916312 | 2. 00E-03 |
| TLR8-AS1    | 1. 147418018 | 1. 007318039 | 1. 307003406 | 3. 85E-02 |

|                |             |             |             |          |
|----------------|-------------|-------------|-------------|----------|
| MORF4L2-AS1    | 1.340067646 | 1.055588563 | 1.701213294 | 1.62E-02 |
| ARMCX5-GPRASP2 | 1.493810769 | 1.074538319 | 2.07667849  | 1.70E-02 |
| LINC00968      | 1.159508496 | 1.010140087 | 1.330963863 | 3.54E-02 |
| LINC02605      | 0.844757665 | 0.733516967 | 0.972868447 | 1.92E-02 |
| OTUD6B-AS1     | 1.8755804   | 1.424981143 | 2.468665536 | 7.25E-06 |
| LINC01592      | 1.217086597 | 1.046310135 | 1.415736822 | 1.09E-02 |
| MIR3150BHG     | 1.136157301 | 1.005018202 | 1.284407994 | 4.14E-02 |
| RAD21-AS1      | 1.279572741 | 1.071529393 | 1.528008852 | 6.47E-03 |
| ZNNT1          | 1.257541415 | 1.030053805 | 1.535269712 | 2.44E-02 |
| FAM83A-AS1     | 1.135214415 | 1.037486712 | 1.242147734 | 5.76E-03 |
| LINC00824      | 1.196892412 | 1.038102025 | 1.379971728 | 1.33E-02 |
| BAALC-AS1      | 1.195401557 | 1.019102735 | 1.402199046 | 2.84E-02 |
| WASHC5-AS1     | 1.246402231 | 1.019261332 | 1.524161148 | 3.19E-02 |
| MAL2-AS1       | 1.210796567 | 1.025664038 | 1.429345548 | 2.39E-02 |
| ASAP1-IT2      | 0.743044369 | 0.620152405 | 0.890289113 | 1.28E-03 |
| NCRNA00250     | 1.310582681 | 1.092494813 | 1.572206058 | 3.58E-03 |
| RHPN1-AS1      | 1.261278304 | 1.02444749  | 1.552859443 | 2.87E-02 |
| LINC00536      | 1.176625327 | 1.062461929 | 1.303055782 | 1.79E-03 |
| LNCOC1         | 1.248424306 | 1.096910958 | 1.420865783 | 7.76E-04 |
| MAFA-AS1       | 0.815265558 | 0.710936548 | 0.934904714 | 3.46E-03 |
| MIR31HG        | 0.829394126 | 0.717308321 | 0.958994335 | 1.16E-02 |
| PGM5-AS1       | 0.845521185 | 0.728447573 | 0.98141047  | 2.73E-02 |
| SMC5-DT        | 1.421967939 | 1.071546812 | 1.886985055 | 1.47E-02 |
| LINC01508      | 1.093309798 | 1.001897055 | 1.193063009 | 4.52E-02 |
| BARX1-DT       | 1.143008991 | 1.010239715 | 1.293227274 | 3.39E-02 |
| UNQ6494        | 0.836990498 | 0.716704943 | 0.97746374  | 2.46E-02 |
| DBH-AS1        | 0.784886006 | 0.67509885  | 0.912527168 | 1.63E-03 |
| BNC2-AS1       | 0.790510997 | 0.671999896 | 0.929922222 | 4.56E-03 |
| C9orf163       | 1.36200311  | 1.091640692 | 1.699325139 | 6.21E-03 |
| LINC01235      | 1.209840782 | 1.088001405 | 1.345324291 | 4.36E-04 |
| PAPPA-AS2      | 0.720172433 | 0.568630329 | 0.912101073 | 6.47E-03 |
| PCAT7          | 1.150674774 | 1.019001742 | 1.299362289 | 2.36E-02 |
| NAV2-AS6       | 0.862001475 | 0.752302249 | 0.987696826 | 3.25E-02 |
| LINC02726      | 1.20428778  | 1.012812452 | 1.431962112 | 3.54E-02 |
| LINC00294      | 1.428012402 | 1.093328523 | 1.86514792  | 8.93E-03 |
| WT1-AS         | 1.093051103 | 1.011002702 | 1.18175818  | 2.54E-02 |
| ZNRD2-AS1      | 1.41476904  | 1.008282059 | 1.985130468 | 4.47E-02 |
| RSF1-IT1       | 1.291620426 | 1.108805762 | 1.50457671  | 1.01E-03 |
| LINC01395      | 1.186715539 | 1.026956331 | 1.371327803 | 2.03E-02 |
| SENCR          | 0.781114597 | 0.633138521 | 0.963675393 | 2.12E-02 |
| GSEC           | 1.280764526 | 1.01874575  | 1.610173854 | 3.41E-02 |
| IRAG1-AS1      | 0.832081918 | 0.694602073 | 0.996772606 | 4.60E-02 |
| LINC02752      | 0.829798223 | 0.706066025 | 0.975213458 | 2.35E-02 |
| KRTAP5-AS1     | 1.131725043 | 1.005072287 | 1.274337766 | 4.10E-02 |
| LINC01001      | 1.420532298 | 1.095193641 | 1.842516186 | 8.17E-03 |
| CENATAC-DT     | 1.432880198 | 1.134041558 | 1.810467745 | 2.58E-03 |
| LINC02685      | 1.207354497 | 1.024392235 | 1.422994857 | 2.46E-02 |
| ADARB2-AS1     | 1.192720831 | 1.093781038 | 1.300610389 | 6.64E-05 |
| MANCR          | 1.239726293 | 1.092158863 | 1.407232348 | 8.90E-04 |
| ST8SIA6-AS1    | 1.100119906 | 1.01923932  | 1.18741868  | 1.43E-02 |
| RPP38-DT       | 1.285394247 | 1.030274329 | 1.603687798 | 2.61E-02 |

|              |             |             |             |          |
|--------------|-------------|-------------|-------------|----------|
| UNC5B-AS1    | 0.824902476 | 0.70637861  | 0.963313562 | 1.50E-02 |
| DLG5-AS1     | 0.706746153 | 0.561534469 | 0.889509288 | 3.10E-03 |
| ZNF503-AS1   | 1.144767773 | 1.031798837 | 1.270105381 | 1.08E-02 |
| LNCAROD      | 1.141273611 | 1.029225722 | 1.265519727 | 1.22E-02 |
| ANK3-DT      | 0.815675772 | 0.710037036 | 0.937031353 | 3.99E-03 |
| ENTPD1-AS1   | 1.314952672 | 1.013174448 | 1.706616794 | 3.96E-02 |
| NUTM2A-AS1   | 1.506773199 | 1.063046764 | 2.135715522 | 2.13E-02 |
| PDCD4-AS1    | 0.651835559 | 0.507011361 | 0.838027763 | 8.43E-04 |
| PITRM1-AS1   | 1.339350205 | 1.022553634 | 1.754293283 | 3.38E-02 |
| SFTPD-AS1    | 0.748006915 | 0.588724268 | 0.950384374 | 1.75E-02 |
| NUTM2B-AS1   | 1.485257684 | 1.091638785 | 2.020806167 | 1.18E-02 |
| LINC02652    | 1.187261817 | 1.004044503 | 1.403912493 | 4.47E-02 |
| WAC-AS1      | 2.189963071 | 1.496833031 | 3.204056934 | 5.40E-05 |
| LINC02617    | 1.194315649 | 1.015082118 | 1.405196529 | 3.23E-02 |
| LINC02449    | 1.209267963 | 1.007276633 | 1.451765045 | 4.16E-02 |
| HOTAIR       | 1.094357988 | 1.015293236 | 1.179579814 | 1.84E-02 |
| LINC02408    | 1.241985305 | 1.039165269 | 1.484390929 | 1.72E-02 |
| GIHCG        | 0.763470745 | 0.589089278 | 0.989472394 | 4.14E-02 |
| LINC01234    | 1.210548204 | 1.109995666 | 1.320209618 | 1.57E-05 |
| CAPS2-AS1    | 0.674473802 | 0.499331773 | 0.911047392 | 1.03E-02 |
| ADGRD1-AS1   | 1.22645867  | 1.084028037 | 1.38760329  | 1.19E-03 |
| LINC02823    | 0.816573666 | 0.702509348 | 0.949158263 | 8.30E-03 |
| USP30-AS1    | 0.850179128 | 0.740878923 | 0.975604147 | 2.08E-02 |
| LINC02463    | 1.195188455 | 1.028847267 | 1.388423227 | 1.97E-02 |
| PCED1B-AS1   | 0.840645664 | 0.711884343 | 0.992696552 | 4.07E-02 |
| LINC00987    | 0.803226097 | 0.66451617  | 0.970890087 | 2.35E-02 |
| LINC01465    | 0.719528018 | 0.541200801 | 0.956614563 | 2.35E-02 |
| DDN-AS1      | 1.295298655 | 1.05695268  | 1.587392357 | 1.26E-02 |
| CCND2-AS1    | 0.783357435 | 0.624240855 | 0.983032217 | 3.51E-02 |
| LINC01559    | 1.200867502 | 1.068773035 | 1.349288118 | 2.08E-03 |
| LRRK2-DT     | 0.802536478 | 0.682362619 | 0.943874679 | 7.86E-03 |
| LLPH-DT      | 1.168826487 | 1.002305931 | 1.363012343 | 4.67E-02 |
| CACNA1C-IT3  | 1.562432288 | 1.183165624 | 2.063273816 | 1.66E-03 |
| LINC00544    | 0.781910546 | 0.634295684 | 0.963878703 | 2.12E-02 |
| LINC00398    | 0.854786055 | 0.732352306 | 0.997688125 | 4.67E-02 |
| LINC00393    | 1.128163077 | 1.035639489 | 1.228952682 | 5.74E-03 |
| LINC00377    | 0.648461435 | 0.479837378 | 0.876343218 | 4.82E-03 |
| LINC01232    | 1.263705167 | 1.043409372 | 1.530512176 | 1.66E-02 |
| LINC01055    | 0.837764057 | 0.730166919 | 0.961216671 | 1.16E-02 |
| PRECSIT      | 1.198576663 | 1.02836871  | 1.396956173 | 2.05E-02 |
| LINC00348    | 1.212339393 | 1.030327071 | 1.426505082 | 2.03E-02 |
| DOCK9-DT     | 0.788959188 | 0.623497493 | 0.998330558 | 4.84E-02 |
| FGF14-AS2    | 0.803372877 | 0.685206843 | 0.941917008 | 6.99E-03 |
| SLC25A30-AS1 | 0.755090647 | 0.640720623 | 0.889875969 | 8.02E-04 |
| LINC00645    | 1.258713311 | 1.043253621 | 1.518671172 | 1.63E-02 |
| LINC00519    | 0.793635496 | 0.667441186 | 0.943689591 | 8.90E-03 |
| LINC02588    | 1.12020754  | 1.018024105 | 1.232647565 | 2.00E-02 |
| LINC02318    | 1.378419077 | 1.125277181 | 1.688507671 | 1.93E-03 |
| DIO3OS       | 0.821828891 | 0.730160013 | 0.925006457 | 1.15E-03 |
| FAM181A-AS1  | 0.724374171 | 0.53601189  | 0.978929664 | 3.59E-02 |
| PSMA3-AS1    | 0.635309994 | 0.409672468 | 0.985223125 | 4.27E-02 |

|             |             |             |             |          |
|-------------|-------------|-------------|-------------|----------|
| ACTN1-AS1   | 0.745971449 | 0.6161268   | 0.903179999 | 2.67E-03 |
| LINC01269   | 1.148268506 | 1.019914684 | 1.29277535  | 2.23E-02 |
| C14orf178   | 0.775474844 | 0.602078666 | 0.998808409 | 4.89E-02 |
| HIF1A-AS3   | 1.198632422 | 1.017672402 | 1.41177031  | 3.00E-02 |
| PWRN1       | 1.231189227 | 1.013820743 | 1.495162654 | 3.59E-02 |
| THBS1-AS1   | 0.930079596 | 0.867847959 | 0.99677374  | 4.02E-02 |
| TPM1-AS     | 0.820782877 | 0.711176435 | 0.947281854 | 6.92E-03 |
| EWSAT1      | 0.899773084 | 0.812538601 | 0.996373098 | 4.24E-02 |
| C15orf54    | 1.186644122 | 1.010552855 | 1.393419717 | 3.68E-02 |
| LINC00926   | 0.684866648 | 0.571291247 | 0.821021377 | 4.28E-05 |
| MIR4713HG   | 1.136287336 | 1.015759105 | 1.271117241 | 2.55E-02 |
| GPR176-DT   | 1.218031781 | 1.007795396 | 1.472125617 | 4.13E-02 |
| VPS33B-DT   | 1.493180604 | 1.176419508 | 1.895232356 | 9.82E-04 |
| LINC00923   | 0.7956201   | 0.650929531 | 0.972472922 | 2.56E-02 |
| OIP5-AS1    | 1.419452762 | 1.033856907 | 1.94886365  | 3.03E-02 |
| SPATA41     | 0.75924068  | 0.647788046 | 0.88986886  | 6.73E-04 |
| LINC02130   | 0.878244063 | 0.787616847 | 0.979299309 | 1.95E-02 |
| ITFG1-AS1   | 1.226109869 | 1.011280299 | 1.486576386 | 3.81E-02 |
| LINC02133   | 1.190516805 | 1.003206905 | 1.41279955  | 4.59E-02 |
| CRNDE       | 1.439880049 | 1.099972265 | 1.884824393 | 7.97E-03 |
| LINC00922   | 0.895451399 | 0.802044652 | 0.99973637  | 4.95E-02 |
| LINC02141   | 1.183618554 | 1.00368414  | 1.39581052  | 4.51E-02 |
| LINC01572   | 1.344519824 | 1.110239778 | 1.628237065 | 2.44E-03 |
| LINC01569   | 0.777318233 | 0.616126763 | 0.980680716 | 3.36E-02 |
| COR01A-AS1  | 0.834429131 | 0.723180651 | 0.962791212 | 1.32E-02 |
| CENPN-AS1   | 1.267802317 | 1.03313691  | 1.555769325 | 2.31E-02 |
| FAM157C     | 1.207385167 | 1.019306897 | 1.430166857 | 2.92E-02 |
| CARHSP1-DT  | 0.766498541 | 0.620659604 | 0.946605853 | 1.35E-02 |
| KIF1C-AS1   | 0.764783927 | 0.613458536 | 0.953437633 | 1.71E-02 |
| LINC02091   | 0.742810437 | 0.622260232 | 0.886714782 | 9.99E-04 |
| ZFP3-DT     | 1.223892314 | 1.029020545 | 1.455668114 | 2.24E-02 |
| LINC01563   | 0.834169644 | 0.705676079 | 0.986060059 | 3.36E-02 |
| RARA-AS1    | 0.743939773 | 0.595015659 | 0.930137513 | 9.45E-03 |
| SP2-AS1     | 1.459429205 | 1.152976625 | 1.847334594 | 1.67E-03 |
| LINC00671   | 0.74804768  | 0.603252825 | 0.927596703 | 8.18E-03 |
| LINC00511   | 1.143573818 | 1.004878141 | 1.301412604 | 4.20E-02 |
| CACNA1G-AS1 | 0.843500918 | 0.716996838 | 0.992324877 | 4.01E-02 |
| LINC01978   | 1.165987094 | 1.022478337 | 1.329637856 | 2.19E-02 |
| RNF213-AS1  | 0.734033315 | 0.60032442  | 0.897522887 | 2.58E-03 |
| ERVE-1      | 1.130013051 | 1.011271083 | 1.262697526 | 3.09E-02 |
| MAPT-AS1    | 0.827233774 | 0.764898945 | 0.894648531 | 2.08E-06 |
| MAPT-IT1    | 0.850256153 | 0.785019342 | 0.920914285 | 6.81E-05 |
| LINC00482   | 1.139674878 | 1.012510048 | 1.282810802 | 3.03E-02 |
| TMEM105     | 1.122768309 | 1.003944745 | 1.255655436 | 4.25E-02 |
| PIK3R5-DT   | 1.23779243  | 1.057683129 | 1.448571937 | 7.84E-03 |
| LINC00670   | 1.342030771 | 1.065812381 | 1.689834556 | 1.23E-02 |
| SNHG16      | 1.304418366 | 1.024388722 | 1.660997664 | 3.11E-02 |
| LINC01973   | 0.777764002 | 0.63437082  | 0.953569779 | 1.56E-02 |
| FMNL1-DT    | 0.811276617 | 0.695842116 | 0.945860755 | 7.57E-03 |
| LHX1-DT     | 1.119826034 | 1.028728894 | 1.218990108 | 8.94E-03 |
| BAIAP2-DT   | 0.733700406 | 0.567516959 | 0.948546608 | 1.81E-02 |

|              |             |             |             |          |
|--------------|-------------|-------------|-------------|----------|
| RUNDC3A-AS1  | 1.166321071 | 1.028991348 | 1.321978892 | 1.61E-02 |
| HID1-AS1     | 1.27964465  | 1.045302269 | 1.566523368 | 1.69E-02 |
| ARHGAP28-AS1 | 0.814556477 | 0.683481667 | 0.97076818  | 2.19E-02 |
| LINC01925    | 1.182084802 | 1.015812313 | 1.37557348  | 3.06E-02 |
| DLGAP1-AS1   | 0.701406386 | 0.518540272 | 0.948761254 | 2.14E-02 |
| PPP4R1-AS1   | 0.777292299 | 0.637765241 | 0.947344381 | 1.26E-02 |
| DLGAP1-AS5   | 0.90510656  | 0.833175536 | 0.983247648 | 1.83E-02 |
| AQP4-AS1     | 0.835478872 | 0.726244204 | 0.961143569 | 1.19E-02 |
| TTC39C-AS1   | 0.798270503 | 0.682957548 | 0.933053303 | 4.65E-03 |
| SNHG22       | 0.71112965  | 0.578770199 | 0.873758497 | 1.18E-03 |
| NDUFV2-AS1   | 0.555253434 | 0.400723855 | 0.769373651 | 4.07E-04 |
| LINC01901    | 1.182885111 | 1.017144117 | 1.375633169 | 2.92E-02 |
| LINC01539    | 0.758346059 | 0.607373679 | 0.946845023 | 1.46E-02 |
| LINC00668    | 1.077254865 | 1.001306343 | 1.158964041 | 4.60E-02 |
| GAPLINC      | 0.770027065 | 0.605423865 | 0.979382736 | 3.32E-02 |
| PCAT18       | 0.870430379 | 0.807783243 | 0.937936075 | 2.71E-04 |
| LIVAR        | 1.323696112 | 1.176577531 | 1.489210315 | 3.09E-06 |
| GREB1L-DT    | 0.67679553  | 0.564369182 | 0.811618005 | 2.53E-05 |
| KDSR-DT      | 0.676889913 | 0.534625267 | 0.85701141  | 1.19E-03 |
| LINC00654    | 1.282846968 | 1.095388417 | 1.502386112 | 2.00E-03 |
| STK4-AS1     | 1.529885698 | 1.217512859 | 1.922402899 | 2.63E-04 |
| CFAP61-AS1   | 1.267096983 | 1.089329004 | 1.47387498  | 2.15E-03 |
| LINC01275    | 1.249723733 | 1.054684655 | 1.480830694 | 1.00E-02 |
| C20orf197    | 0.748359444 | 0.614173988 | 0.911861896 | 4.04E-03 |
| LINC00266-1  | 1.336392329 | 1.094811867 | 1.631279777 | 4.37E-03 |
| LAMA5-AS1    | 0.842868458 | 0.731306002 | 0.97145003  | 1.83E-02 |
| ZNF337-AS1   | 1.343043711 | 1.034825755 | 1.743062927 | 2.66E-02 |
| LINC01711    | 0.795799466 | 0.68644274  | 0.922577737 | 2.46E-03 |
| LINC00659    | 1.144549088 | 1.022191397 | 1.28155316  | 1.93E-02 |
| NORAD        | 1.384034048 | 1.019355938 | 1.879177013 | 3.73E-02 |
| DPP9-AS1     | 0.793639814 | 0.655262956 | 0.961238763 | 1.81E-02 |
| KLF2-DT      | 0.704424976 | 0.534519395 | 0.928337778 | 1.28E-02 |
| LINC00662    | 1.443331541 | 1.070662321 | 1.945717055 | 1.60E-02 |
| DPY19L3-DT   | 1.230199124 | 1.004606819 | 1.506449941 | 4.50E-02 |
| NAPA-AS1     | 0.729227228 | 0.531801481 | 0.999945221 | 5.00E-02 |
| IGFL2-AS1    | 1.148510731 | 1.028893592 | 1.282034322 | 1.36E-02 |
